# Supplementary material for: Scoping review of systematic reviews of complementary medicine for musculoskeletal and mental health conditions
Source: PubMed Central journal article supplement — BMJ Open. 2018 Oct 15;8(10):e020222. doi: 10.1136/bmjopen-2017-020222 (PMC6196876; doi:10.1136/bmjopen-2017-020222), 2018-10-15

# BMJ Open

BMJ Open is committed to open peer review. As part of this commitment we make the peer review history of every article we publish publicly available.

When an article is published we post the peer reviewers' comments and the authors' responses online. We also post the versions of the paper that were used during peer review. These are the versions that the peer review comments apply to.

The versions of the paper that follow are the versions that were submitted during the peer review process. They are not the versions of record or the final published versions. They should not be cited or distributed as the published version of this manuscript.

BMJ Open is an open access journal and the full, final, typeset and author-corrected version of record of the manuscript is available on our site with no access controls, subscription charges or pay-per-view fees (<http://bmjopen.bmj.com>).

If you have any questions on BMJ Open's open peer review process please email [info.bmjopen@bmj.com](mailto:info.bmjopen@bmj.com)

# BMJ Open

## A Scoping Review of Systematic Reviews of Complementary Medicine for Musculoskeletal and Mental Health.

|                               |                                                                                                                                                                                                                                                                                                                                                                         |
|-------------------------------|-------------------------------------------------------------------------------------------------------------------------------------------------------------------------------------------------------------------------------------------------------------------------------------------------------------------------------------------------------------------------|
| Journal:                      | <i>BMJ Open</i>                                                                                                                                                                                                                                                                                                                                                         |
| Manuscript ID                 | bmjopen-2017-020222                                                                                                                                                                                                                                                                                                                                                     |
| Article Type:                 | Research                                                                                                                                                                                                                                                                                                                                                                |
| Date Submitted by the Author: | 30-Oct-2017                                                                                                                                                                                                                                                                                                                                                             |
| Complete List of Authors:     | Lorenc, Ava<br>Feder, Gene; University of Bristol, Community based medicine<br>MacPherson, Hugh; University of York, Health Sciences<br>Little, Paul; University of Southampton, Primary Care and Population Science;<br>Mercer, Stewart; University of Glasgow, Institute of Health and Wellbeing<br>Sharp, Deborah; University of Bristol, Population Health Sciences |
| Keywords:                     | COMPLEMENTARY MEDICINE, Musculoskeletal disorders < ORTHOPAEDIC & TRAUMA SURGERY, MENTAL HEALTH, PRIMARY CARE                                                                                                                                                                                                                                                           |
|                               |                                                                                                                                                                                                                                                                                                                                                                         |

SCHOLARONE™  
Manuscripts

View Only

# A Scoping Review of Systematic Reviews of Complementary Medicine for Musculoskeletal and Mental Health.

Ava Lorenc\*, Population Health Sciences, Bristol Medical School, Bristol, UK.

Gene Feder, Population Health Sciences, Bristol Medical School, Bristol, UK

Hugh MacPherson, Department of Health Sciences, University of York, York, UK

Paul Little, Primary Care and Population Sciences Unit, University of Southampton, Southampton, UK

Stewart W Mercer, General Practice and Primary Care, Institute of Health and Wellbeing, University of Glasgow, Scotland, UK

Deborah Sharp, Population Health Sciences, Bristol Medical School, Bristol, UK

\*Corresponding author: [Ava.lorenc@bristol.ac.uk](mailto:Ava.lorenc@bristol.ac.uk); 0117 3313902

Word count: 4293

## ABSTRACT

Background: Musculoskeletal (MSK) and mental health (MH) conditions have a high disease burden, and their co-existence is common, yet evidence for interventions is weak. Complementary and alternative medicine (CAM) may have a role in managing MSK –MH comorbidity.

Objective: This literature review aimed to identify effective CAM for MSK –MH comorbidity, by collating the evidence on effectiveness, cost-effectiveness and safety from recent systematic reviews (SRs).

Design: Review of systematic reviews.

Methods: We searched literature databases, registries, reference lists, and contacted key authors and professional organisations, to identify SRs of RCTs for CAM and either MSK or MH. Inclusion criteria were: published after 2004, studying adults, in English and scoring > 50% on AMSTAR (quality appraisal checklist). SRs were analysed to identify key research priorities, based on high-quality evidence of effectiveness, total sample size, and any indication of cost-effectiveness and safety, in MSK-MH comorbidity.

Results: We included 84 MSK reviews and 27 MH reviews. The best MSK evidence (moderate/good quality for effectiveness in a moderate/large population, indications of cost-effectiveness/safety) was for low back pain (yoga, acupuncture, spinal manipulation/mobilisation, osteopathy, spa/balneotherapy and tai chi), myofascial trigger point pain (acupuncture), osteoarthritis (acupuncture, tai chi), neck pain (manipulation/manual therapy), fibromyalgia (acupuncture, manual therapy) and lateral epicondylitis (manual therapy). The best MH evidence was for depression (meditation/mindfulness, tai chi, relaxation and acupuncture), anxiety (meditation/mindfulness, moving meditation, yoga), sleep disorders (meditative/mind-body movement), and stress/distress (mindfulness). Very few SRs considered comorbid populations, however, acupuncture, yoga, tai chi and mindfulness/meditation have evidence for both MSK and MH conditions.

Conclusions: Promising CAMs for future research in this area are yoga, mindfulness, tai chi and acupuncture, for low back pain, osteoarthritis, fibromyalgia and depression, anxiety and sleep problems. Despite the large number of SRs and RCTs, high quality, sufficiently powered RCTs with long-term follow up and cost-effectiveness estimates are needed.

## STRENGTHS AND LIMITATIONS OF THIS STUDY:

- A review with a comprehensive scope covering a wide range of topics
- This review used systematic searching and screening techniques
- Results are limited by our pragmatic choice to only include high-quality systematic reviews and definition of CAM as including a practitioner in its delivery.
- Date and language limitations may have excluded some topics.

## INTRODUCTION

Musculoskeletal (MSK) and mental health (MH) disorders are two conditions resulting in some of the highest burden in terms of disability, accounting for 30.5% and 21.1% of Years Lived with Disability respectively.[1] Both affect one in four UK adults at some point in their life.[2-4] MSK disorders lead to very high healthcare expenditure and loss of work, [5] in the UK accounting for 7.5 million working days lost annually[6] and 60% of occupational sick leave.[2] In England, it has been estimated that MH costs £105 billion, and treatment costs are expected to rise substantially.[7]

Low back pain (LBP) is one of the most common health conditions,[8-10] with a mean global prevalence of 31% [10] and a UK prevalent population of 17.3 million,[11] costing the NHS over £500 million/year.[12] In the UK, 8.75 million people have sought treatment for osteoarthritis[13] which is estimated to have caused £14.8 billion indirect costs.[14]

The most common MH conditions are depression and anxiety.[3,4] In England, 19% of adults reported ever being diagnosed with depression and 6% of adults have been diagnosed with generalised anxiety disorder.[15] Insomnia is another common MH problem, affecting 6.4% of the UK general population.[16]

There is an increasing recognition of the importance of multimorbidity, that is, the co-existence of two or more physical and/or mental long-term conditions in an individual, which is now the norm in the UK.[17-19] In a study in Scotland, 8.3% of all patients (36% of those with multimorbidity), had both a physical and a mental health disorder[20] and around 50% of patients with depression have pain symptoms.[21] Long term MSK disorders are closely associated with multimorbidity.[22]

Complementary and alternative medicine (CAM) is “a diverse group of health-related therapies and disciplines which are not considered to be a part of mainstream medical care”, including osteopathy, chiropractic, acupuncture, herbal medicine and homeopathy.[23] Estimates of 12-month prevalence of use of any CAM are 0.3-86% in Europe[24] and 26% in England.[25] One of the key roles for CAM is ‘effectiveness gaps’ where effective conventional treatment options are limited,[26,27] which includes many areas of MSK and MH, particularly depression.[27] Both MH[28-30] and MSK[31,32] are common reasons for patients to use CAM.

It is likely that there is a potential role for CAM in the care of patients with multimorbid MH and MSK conditions in primary care. This scoping review aims to identify which CAM treatments might be effective and worth researching further, in a formal, systematic and transparent way (which is often lacking in research priority setting exercises). This is thought to be an essential step in the development of a strategy for the integration of CAM with conventional care.[27]

## METHODS

### Aims

This study aimed to review the current evidence for the use of practitioner-based CAM for musculoskeletal disorders (MSK) and mental health conditions (MH) in order to propose research priorities in terms of treatment choice and specific patient groups/conditions for a future trial of multimorbid MSK and MH in UK primary care. The specific aims were to:

- collate the evidence on effectiveness, cost-effectiveness and safety from recent systematic reviews (SRs) of trials of CAM for MSK and MH conditions
- identify areas where there is high quality evidence of effectiveness but sufficient uncertainty to justify a trial
- identify areas where there is also some evidence of cost-effectiveness and safety

### Searches

As this was a scoping review, we used a wide range of methods to identify SRs (published, unpublished, in progress). Literature databases were searched (see below for details of searches): AMED, Medline, EMBASE, CINAHL, PsycINFO; Index to theses; Cochrane library; Epistemonikos; SIGLE. Three trial registries were searched (UKCRN; Health service research projects in progress; Prospero). Reference lists of 'overviews of SRs' and reports (from professional/patient organisations) were searched. We emailed key authors in the field. We also asked the project team, steering group and public and patient involvement (PPI) group, and used websites/social media (university websites, Research Gate and Twitter) to access the wider research community. We asked patient and professional organisations to ask their members for any information (by email, newsletters or social media), these included: disease specific organisations e.g. Arthritis Research UK, Back Care and MIND; CAM organisations e.g. Research Council for Complementary Medicine and Complementary and Natural Healthcare Council; primary care organisations e.g. UK Royal College of General Practitioners. We presented at one conference and distributed a flyer at another. We contacted the authors of eligible conference abstracts and protocols to ascertain if the SR was available e.g. submitted or in press.

For complementary medicine we used MeSH terms or subject headings, plus additional terms for CAM which were not indexed. To ensure relevance to a UK primary care model, we only included CAM which involve practitioner-led treatment. We therefore excluded herbal medicine, as the majority of studies do not involve a practitioner. For musculoskeletal conditions, we used 'musculoskeletal diseases/disorders' as index terms, adding in any which were missing. For mental health, we searched for minor mental health issues and symptoms rather than diagnosed mental disorders. Thus, words in titles/abstracts were searched for (rather than subject headings), as authors may not classify papers as 'mental health' unless diagnosed mental health conditions are part of the study. Reviews related to a secondary condition such as cancer or cardiovascular disease were included if relevant for a primary care population, i.e. are commonly treated in primary care e.g. including diabetes, obesity, respiratory conditions but excluding HIV, stroke, critical illness.

Database searches were conducted in June 2015 and updated in February 2016, in collaboration with a librarian. We used filters for SRs. We excluded reviews published pre-2005, in order to make the final number of papers manageable and with the understanding that these papers were more likely to be of poorer quality. We only included English language reviews. Databases were searched for two topics: complementary medicine + musculoskeletal disorders and complementary medicine + mental health. See Appendix 1 for details and Box 1 for an example search.

*Box 1: Example search (OVID Medline)*

1. "Alexander technique".tw.
2. "bowen technique".tw.
3. craniosacral.tw.
4. ("emotional freedom technique" or EFT).tw.
5. feldenkrais.tw.
6. Pilates.tw.
7. reiki.tw.
8. Shiatsu.tw.
9. trager.tw.
10. "complementary medicine".tw.
11. "integrative medicine".tw.
12. exp complementary therapies/
13. integrative medicine/
14. Manipulation, Spinal/
15. acupuncture/
16. Musculoskeletal manipulations/
17. Mindfulness/
- 18. 1 or 2 or 3 or 4 or 5 or 6 or 7 or 8 or 9 or 10 or 11 or 12 or 13 or 14 or 15 or 16 or 17**
19. exp Musculoskeletal System/
20. exp Musculoskeletal Diseases/
21. myalgia/
22. exp back pain/
23. neck pain/
24. chronic pain/
25. headache/ or exp headache disorders, primary/
- 26. 19 or 20 or 21 or 22 or 23 or 24 or 25**
27. ((systematic or structured or evidence or trials).ti. and ((review or overview or look or examination or update\$ or summary).ti. or review.pt.) or (meta analysis.pt. or meta-analysis/ or "0266-4623".is.) or (reviewed systematically or systematically reviewed).tw. or (1469-493X or 1366-5278 or 1530-440X).is.
28. ("review" or "review academic" or "review tutorial").pt.
29. (medline or medlars or embase or pubmed).tw,sh.
30. (scisearch or psychinfo or psycinfo).tw,sh.
31. (psychlit or psyclit).tw,sh.
32. cinahl.tw,sh.
33. ((hand adj2 search\$) or (manual\$ adj2 search\$)).tw,sh.
34. (electronic database\$ or bibliographic database\$ or computeri#ed database\$ or online database\$).tw,sh.
35. (pooling or pooled or mantel haenszel).tw,sh.
36. (retraction of publication or retracted publication).pt.
37. (peto or dersimonian or der simonian or fixed effect).tw,sh.
38. 29 or 30 or 31 or 32 or 33 or 34 or 35 or 36 or 37
39. 28 and 38
40. meta-analysis.pt.
41. meta-analysis.sh.
42. (meta analys\$ or metaanalys\$).tw,sh.
43. (systematic\$ adj5 review\$).tw,sh.
44. (systematic\$ adj5 overview\$).tw,sh.
45. (quantitativ\$ adj5 review\$).tw,sh.
46. (quantitativ\$ adj5 overview\$).tw,sh.
47. (quantitativ\$ adj5 synthesis\$).tw,sh.
48. (methodologic\$ adj5 review\$).tw,sh.
49. (methodologic\$ adj5 overview\$).tw,sh.
50. (integrative research review\$ or research integration).tw.
51. 40 or 41 or 42 or 43 or 44 or 45 or 46 or 47 or 48 or 49 or 50
- 52. 27 or 39 or 51**
- 53. 18 and 26 and 52**

We used the inclusion/exclusion criteria (see Appendix 1) to screen the results from each search. This was a multi-stage process involving the whole project team. AL screened the titles of all search

1  
2  
3 results, and DS checked the results, with any disagreements discussed and inclusion criteria  
4 amended accordingly. AL then screened the abstracts, which were also independently screened by  
5 another of the authors. Results were compared, any disagreements discussed, and the criteria again  
6 amended accordingly. Any remaining disagreements were discussed and resolved with a third  
7 reviewer. AL then screened the full text of the agreed papers.  
8

### 9 **Data extraction**

10 AL extracted the following data from each review: author, year, location, CAM/s, health condition/s,  
11 for MSK reviews whether MH was included and for MH reviews whether findings applied to MSK  
12 populations, methodological features (sources searched, inclusion/exclusion criteria,  
13 quality assessment), results and conclusions (effectiveness, safety, cost-effectiveness).  
14  
15

### 16 **Quality appraisal**

17 Although not essential,[33] quality assessment is recommended in scoping reviews.[34] We used a  
18 limited quality appraisal to help inform prioritisation: AMSTAR, a validated checklist.[35] Due to  
19 time constraints and the number of SRs to be appraised, a simple procedure was followed, using the  
20 'search' function in the text of SRs to find particular terms. The emphasis was on obtaining relative  
21 scores, allowing ranking of the included reviews, rather than an absolute score of quality. For each of  
22 the 11 items on the AMSTAR checklist, a score of 0 was given if they did not meet the criteria, or if  
23 information was unavailable, and a score of 1 if the criteria were met. The scores were summed to  
24 give a score for each SR out of a total of 11.  
25  
26

27 Any reviews which scored 5 or less (half of the possible total) on AMSTAR were not considered in the  
28 evidence synthesis.  
29

### 30 **Analysis**

31 Reviews were placed into a matrix of health condition/symptom vs CAM. For each cell, data were  
32 synthesised according to:  
33

- 34 • effectiveness: where there was more than one SR on a similar topic, if possible, one SR was  
35 prioritised, based on date, breadth, quality and level of analysis.
- 36 • quality of studies: conclusions from the prioritised review regarding the quality of its  
37 included studies were reported
- 38 • cost effectiveness: any information on cost effectiveness was synthesised across all the  
39 included reviews.
- 40 • safety: any information on safety was synthesised across all the included reviews.
- 41 • conclusion and research priorities: conclusions were drawn from across these four domains;  
42 research priorities were extracted from each SR's conclusions and summarised regarding the  
43 need for further research and any specific suggestions on methodology.  
44  
45

46 Finally, a two stage process identified the priority areas (condition and CAM) for future research.  
47 Stage one was based on consideration of the following criteria:  
48

- 49 **1. Effectiveness** - areas were prioritised where there was enough high quality evidence to  
50 establish proof of concept, but still key gaps (from the evidence synthesis). Data for these,  
51 criteria came from the conclusions of the prioritised review(s) regarding effectiveness and  
52 quality
- 53 **2. Cost** – areas where there was any indication that the intervention may have potential for  
54 cost effectiveness were prioritised
- 55 **3. Safety** - areas where there was any indication that the intervention is safe were prioritised  
56  
57  
58  
59  
60



- 1  
2  
3 **4. Multimorbidity** - any indication that the intervention may be effective for multimorbid MH  
4 and MSK patients were prioritised  
5

6 Stage two: once a list of key priority areas had been compiled, information on total sample size for  
7 the prioritised SRs (i.e. total number of participants in the trials included in the SR/s was added to  
8 allow further discrimination, classified as: small (<500 participants); moderate (501 to 3000); or large  
9 (>3000).  
10

## 11 RESULTS

### 12 Search results

13  
14 Figure 1 shows the PRISMA flowchart of the searches.[36] Searches resulted in 8393 references –  
15 4304 for MH and 4089 for MSK, plus 3 for MH identified elsewhere (a journal email update). After  
16 removing duplicates, Cochrane reviews which were withdrawn, Cochrane reviews which had been  
17 updated, or those not in English, 5230 records remained, for title screening. This resulted in 486 MH  
18 and 739 MSK records for the abstract screening phase. We then excluded 49 (13 MH and 36 MSK)  
19 records i.e. editorials, commentaries, abstracts etc. After abstract screening, there remained 444  
20 studies (180 MH and 264 MSK). At this stage, a further 12 records were added – 3 from grey  
21 literature (Prospero/Sigle/HSRProj), 5 from conference abstracts, and 4 from the reference lists of  
22 overviews of SRs and other key reports. This produced 456 records to be screened at the full text  
23 stage, after which 206 records remained: 48 MH, 158 MSK.  
24  
25  
26  
27  
28  
29  
30  
31  
32  
33  
34  
35  
36  
37  
38  
39  
40  
41  
42  
43  
44  
45  
46  
47  
48  
49  
50  
51  
52  
53  
54  
55  
56  
57  
58  
59  
60

1  
2  
3 During screening at the title stage (AL and DS) there were 49 disagreements (out of 4411 records;  
4 1%). During abstract screening (AL and each of the 6 authors) there were a total of 296 initial  
5 disagreements (out of 1165 records; 25%). Most were resolved by discussion without requiring a  
6 third reviewer.  
7

8 Of the 158 MSK systematic reviews, 84 were included as high quality (scored 6 or more on AMSTAR).  
9 They covered 17 different CAMs and 15 different disorders. The overall matrix is shown below in  
10 Table 1. Low back pain was by far the most common topic, addressed by 40% of reviews.  
11 Fibromyalgia was the next most common, followed by osteoarthritis then neck pain/disorders.  
12 Acupuncture was the most common CAM studied (37%), followed by manual therapy (including  
13 manipulation and mobilisation). The mean AMSTAR score for methodological quality of MSK reviews  
14 was 6/11 (ranging from 0 to 11). Appendix 2 shows which items on the AMSTAR checklist were  
15 reported by the reviews.  
16  
17  
18  
19  
20  
21  
22  
23  
24  
25  
26  
27  
28  
29  
30  
31  
32  
33  
34  
35  
36  
37  
38  
39  
40  
41  
42  
43  
44  
45  
46  
47  
48  
49  
50  
51  
52  
53  
54  
55  
56  
57  
58  
59  
60

1  
2  
3  
4  
5  
6  
7  
8  
9  
10  
11  
12  
13  
14  
15  
16  
17  
18  
19  
20  
21  
22  
23  
24  
25  
26  
27  
28  
29  
30  
31  
32  
33  
34  
35  
36  
37  
38  
39  
40  
41  
42  
43  
44  
45  
46  
47

| Table 1: Matrix of MSK reviews (numbers = number of reviews) |                                                 | LBP          |              | Fibro-myalgia |              | Neck pain/disorders |              | Osteo arthritis |              | Rheumatoid arthritis |              | MSK pain/conditions |              | Myofascial pain |              | Shoulder pain/disorder |              | Other        |              | Total |
|--------------------------------------------------------------|-------------------------------------------------|--------------|--------------|---------------|--------------|---------------------|--------------|-----------------|--------------|----------------------|--------------|---------------------|--------------|-----------------|--------------|------------------------|--------------|--------------|--------------|-------|
|                                                              |                                                 | Total number | High quality | Total number  | High quality | Total number        | High quality | Total number    | High quality | Total number         | High quality | Total number        | High quality | Total number    | High quality | Total number           | High quality | Total number | High quality |       |
| Acupuncture related                                          | Acupressure                                     | 2            | 2            |               |              | 2                   | 1            |                 |              |                      |              | 1                   | 1            |                 |              |                        |              | 1            | 0            | 6     |
|                                                              | Acupuncture                                     | 12           | 6            | 9             | 6            | 5                   | 2            | 10              | 6            | 4                    | 2            | 4                   | 2            | 6               | 3            | 2                      | 1            | 6            | 5            | 58    |
|                                                              | Moxibustion                                     | 1            | 0            | 1             | 0            |                     |              | 1               | 0            | 2                    | 1            |                     |              |                 |              |                        |              | 1            | 0            | 6     |
| Manipulation                                                 | Chiropractic                                    | 2            | 1            | 3             | 1            |                     |              | 1               | 0            |                      |              |                     |              | 1               | 0            |                        |              |              |              | 7     |
|                                                              | Manual therapy/spinal manipulation/mobilisation | 12           | 9            | 8             | 4            | 14                  | 9            | 2               | 1            |                      |              | 1                   | 0            | 1               | 0            | 5                      | 3            | 3            | 2            | 46    |
|                                                              | Osteopathy                                      | 3            | 2            | 2             | 1            |                     |              |                 |              |                      |              | 1                   | 1            |                 |              |                        |              |              |              | 6     |
| Other                                                        | Integrative therapies/Multiple CAM              | 2            | 2            | 2             | 2            |                     |              |                 |              |                      |              |                     |              |                 |              |                        |              |              |              | 4     |
|                                                              | Tai chi                                         | 1            | 1            | 1             | 0            | 1                   | 0            | 7               | 5            | 3                    | 1            | 1                   | 1            |                 |              |                        |              |              |              | 14    |
|                                                              | Qigong                                          |              |              |               |              | 1                   | 0            | 1               | 0            | 1                    | 0            |                     |              |                 |              |                        |              |              |              | 3     |
|                                                              | Pilates                                         | 10           | 5            |               |              |                     |              |                 |              |                      |              |                     |              |                 |              |                        |              |              |              | 10    |
|                                                              | CAM exercise                                    |              |              | 2             | 2            |                     |              |                 |              |                      |              |                     |              |                 |              |                        |              |              |              | 2     |
|                                                              | Yoga                                            | 8            | 4            | 1             | 1            | 1                   | 0            | 3               | 0            | 1                    | 0            | 1                   | 1            |                 |              |                        |              |              |              | 15    |
|                                                              | Mindfulness/meditation                          | 2            | 0            | 5             | 3            |                     |              |                 |              | 2                    | 0            | 4                   | 2            |                 |              |                        |              |              |              | 13    |
|                                                              | Relaxation                                      |              |              | 3             | 1            |                     |              | 1               | 0            | 1                    | 0            | 1                   | 0            |                 |              |                        |              |              |              | 6     |
|                                                              | Hypnotherapy                                    | 1            | 0            | 1             | 1            |                     |              | 1               | 0            | 1                    | 0            |                     |              |                 |              |                        |              |              |              | 4     |
|                                                              | Spa therapy/balneotherapy                       | 2            | 1            | 2             | 1            |                     |              |                 |              | 1                    | 1            |                     |              |                 |              |                        |              |              |              | 5     |
|                                                              | TCM bodywork                                    | 2            | 1            |               |              | 1                   | 0            |                 |              |                      |              | 1                   | 0            |                 |              |                        |              |              |              | 4     |
| Massage/therapeutic touch                                    | 4                                               | 2            |              |               | 4            | 2                   | 1            | 0               | 1            | 0                    | 1            | 0                   |              |                 | 1            | 0                      | 1            | 1            | 13           |       |
| Homeopathy                                                   |                                                 |              | 2            | 0             |              |                     |              |                 |              |                      |              |                     |              |                 |              |                        |              |              | 2            |       |
| <b>Total</b>                                                 |                                                 | <b>64</b>    | <b>36</b>    | <b>42</b>     | <b>23</b>    | <b>29</b>           | <b>14</b>    | <b>28</b>       | <b>12</b>    | <b>17</b>            | <b>5</b>     | <b>16</b>           | <b>8</b>     | <b>8</b>        | <b>3</b>     | <b>8</b>               | <b>4</b>     | <b>12</b>    | <b>8</b>     |       |

Of the 48 MH systematic reviews, 27 were high quality (scored 6 or more on AMSTAR). They covered 18 different CAMs and five different categories of MH symptom or disorder. The overall matrix is shown below in Table 2. Many of the reviews included more than one MH condition. 75% of reviews included depression. Meditation, yoga, acupuncture and meditative movement were the most common CAM. Appendix 2 shows which items on the AMSTAR checklist were reported by the reviews.

| Table 2 : Matrix of MH reviews (numbers = number of reviews) |                                                   | Depression   |              | Anxiety      |              | Stress       |              | Insomnia / sleep |              | Distress (psychological) |              | Total <sup>1</sup> |
|--------------------------------------------------------------|---------------------------------------------------|--------------|--------------|--------------|--------------|--------------|--------------|------------------|--------------|--------------------------|--------------|--------------------|
|                                                              |                                                   | Total number | High quality | Total number | High quality | Total number | High quality | Total number     | High quality | Total number             | High quality |                    |
| Acupuncture                                                  | Acupuncture                                       | 9            | 3            | 2            | 1            |              |              | 2                | 1            |                          |              | 6                  |
|                                                              | Auricular acupuncture                             |              |              |              |              |              |              | 3                | 1            |                          |              | 4                  |
| Multiple                                                     | CAM (multiple) (did not separate CAM in analysis) | 1            | 0            | 1            | 0            |              |              | 2                | 1            |                          |              | 4                  |
| Meditation/ mindfulness                                      | Mindfulness                                       | 3            | 2            | 1            | 1            | 1            | 1            |                  |              | 1                        | 1            | 5                  |
|                                                              | Meditation                                        |              |              | 3            | 3            | 1            | 1            | 1                | 0            |                          |              | 9                  |
| Exercise                                                     | Meditative Movement                               |              |              |              |              |              |              | 3                | 3            |                          |              | 6                  |
|                                                              | Qigong                                            | 4            | 1            | 2            | 1            | 1            | 1            |                  |              |                          |              | 5                  |
|                                                              | Tai chi                                           | 4            | 2            | 1            | 0            |              |              | 3                | 1            |                          |              | 5                  |
|                                                              | Yoga                                              | 4            | 2            | 3            | 3            | 1            | 0            | 1                | 0            |                          |              | 8                  |
| Other                                                        | Homeopathy                                        |              |              |              |              |              |              | 1                | 1            |                          |              | 2                  |
|                                                              | Hypnosis                                          | 2            | 0            |              |              |              |              | 2                | 2            |                          |              | 4                  |
|                                                              | Music therapy                                     | 3            | 2            | 1            | 1            |              |              |                  |              |                          |              | 2                  |
|                                                              | Relaxation                                        | 3            | 1            | 1            | 1            |              |              | 1                | 1            |                          |              | 4                  |
|                                                              | Reflexology                                       |              |              |              |              |              |              | 1                | 0            |                          |              | 1                  |
|                                                              | Reiki                                             | 1            | 1            | 1            | 1            |              |              |                  |              |                          |              | 2                  |
|                                                              | Spinal manipulation                               |              |              |              |              |              |              |                  |              |                          |              | 0                  |
|                                                              | Massage/Therapeutic touch                         | 2            | 1            | 2            | 2            |              |              |                  |              |                          |              | 4                  |
| Morita therapy                                               |                                                   |              | 1            | 1            |              |              |              |                  |              |                          |              | 2                  |
| <b>Total<sup>1</sup></b>                                     |                                                   | <b>36</b>    | <b>15</b>    | <b>19</b>    | <b>15</b>    | <b>4</b>     | <b>3</b>     | <b>20</b>        | <b>11</b>    | <b>1</b>                 | <b>1</b>     |                    |
| 1. Note that reviews can occur in more than one row/column   |                                                   |              |              |              |              |              |              |                  |              |                          |              |                    |

The following sections present a summary of the areas, as described above, where SRs found moderate/good quality evidence of effectiveness (from prioritised SRs), and where there is some indication of cost-effectiveness and safety (from any of the included SRs).

### Evidence for MSK disorders

The MSK disorders with the most evidence were low back pain, myofascial trigger point pain, osteoarthritis, neck pain, fibromyalgia and lateral epicondylitis. All other combinations of condition/CAM/comparator were either poor quality, ineffective, or moderate quality but harmful.

## Low back pain

There was good quality evidence in a medium size population for:

- yoga for low back pain compared to any control, for pain, global improvement and disability in the short-term.[37] There is some evidence of safety,[37-39] although none on cost-effectiveness. Evidence for long term effects or compared to other active interventions is of moderate quality.[37]
- osteopathy for low back pain compared to spinal manipulation/heat/physical therapy, although there is some evidence of harm.[40]

There was moderate quality evidence in a large population for:

- acupuncture for low back pain compared to usual care (for pain, function, wellbeing, disability, ROM, quality of life) and placebo (for pain and quality of life; negative evidence for disability),[41 ,42] as well as some evidence of safety[43 ,44] and cost-effectiveness.[41]
- spinal manipulation/mobilisation for low back pain compared to other active interventions, although results only apply for chronic low back pain,[41 ,45 ,46] and some evidence of safety.[40 ,41 ,45-47]

There was moderate quality evidence in a small population for:

- spa/balneotherapy for low back pain compared to medication/exercise (balneotherapy) or usual care (spa therapy), and some evidence it is safe.[48]
- tai chi for low back pain compared to usual care, but nothing on safety, costs or impact on MH outcomes.[44]

## Myofascial trigger point pain

Acupuncture for myofascial trigger point pain compared to placebo and other active interventions had good quality evidence in a medium size population for pain in the short and medium term but not in the long term.[49] However, there is no evidence for safety, cost-effectiveness, or impact on MH outcomes.[49-51]

## Osteoarthritis

There was good quality evidence:

- in a large population for acupuncture for knee or peripheral joint OA compared to placebo,[52 ,53] although there is some evidence of harm.[53 ,54]
- in a small population for tai chi for knee OA, compared to usual care or any control, for pain, physical function and stiffness, and physical quality of life, but only in the short term,[55] and some evidence of safety.[55-57]

## Neck pain

For manual therapy plus exercise compared to exercise alone there was good quality evidence in a medium sized population,[58] and moderate quality evidence in a large population for manipulation compared to other mobilisation/medication (cervical manipulation) or any control (thoracic manipulation).[59] There was moderate quality evidence in a medium sized population for a range of other techniques.[58-60] There is some evidence of cost-effectiveness,[58 ,60] but also some evidence of potential harm.[59 ,61]

Acupuncture for neck pain compared to placebo or usual care had moderate quality evidence in a medium sized population for,[62] although no evidence of cost-effectiveness.[41]

### Fibromyalgia

There was moderate quality evidence in a small population for acupuncture for fibromyalgia, compared to placebo for stiffness (acupuncture) and for pain and sleep disorders (electroacupuncture), and poor quality evidence in a small population compared to usual care for pain (electroacupuncture).[63] However there was some evidence that acupuncture is less effective than usual care for MH outcomes in fibromyalgia.[63] There is some evidence of safety[63-67] but none of cost effectiveness.

Only poor quality evidence existed in a small population for manual therapy (myofascial release) for fibromyalgia for both pain and MH (anxiety and depression) compared to placebo,[68] with some evidence of safety[69] but no evidence of cost-effectiveness.

### Lateral epicondylitis

Moderate quality evidence was documented (but the sample size was not reported) for manual therapy (mobilisation with movement) for lateral epicondylitis, although no evidence of safety.[70]

### Evidence for mental health

No reviews provided good quality evidence for CAM for any MH condition nor any evidence of cost-effectiveness, mainly because the latter was not reported.

### Depression

There was moderate quality evidence in a medium size population for using MBSR for depression compared to usual care[71] and for meditation compared to other active interventions,[72] as well as some evidence of effectiveness in an MSK population.[71 ,72] Evidence for using mindfulness meditation (other than MBSR/meditation) for depression was poor quality in a medium sized population but there was some evidence of effectiveness in an MSK population.[72] MBSR/mindfulness/meditation all have some evidence of safety.[72]

For older adults, there was moderate quality evidence in a medium sized population for tai chi for depression, compared to usual care,[73] although it may be less effective in multimorbid populations (including some MSK conditions).[74]

There was moderate quality evidence (sample size not reported) for relaxation for depression compared to any control, but no evidence of safety or cost-effectiveness.[75].

Only poor quality evidence in a medium sized population was available for acupuncture for depression compared to medication,[76] with some evidence of safety.[76 ,77]

### Anxiety

There was moderate quality evidence in a medium sized population for:

- meditation for anxiety, compared to usual care, placebo or other active interventions,[78] and moderate quality evidence in a medium sized population for MBSR compared to usual care,[71] and for moving meditation compared to static meditation,[78] as well as some evidence of safety[72 ,78 ,79] and effectiveness in an MSK population.[71 ,72]
- yoga for anxiety but only for women with breast cancer,[80] and nothing on safety.[81]

### Sleep disorders

For older adults, there was moderate quality evidence in a medium sized population for meditative/mind-body movement for sleep disorders, compared to usual care and other active interventions,[82] as well as some evidence of safety,[82] and effectiveness in an MSK population.[83]

### Stress and distress

There was moderate quality evidence in a medium sized population for:

- mindfulness for stress compared to usual care and placebo, and some evidence of effectiveness in an MSK population.[71]
- mindfulness for distress compared to usual care, and some evidence of effectiveness in an MSK population.[71]

There was only poor quality evidence for all other combinations of condition/CAM/comparator.

### Evidence for effectiveness in multimorbidity

Very few of the SRs considered multimorbid populations. However, there are some CAM which appear to be effective for both MSK and MH conditions.

Acupuncture shows some effectiveness in both MSK and MH conditions. However, for MSKs, the effects are compared to usual care (low back pain, neck pain and fibromyalgia) and for MH they are only compared to other active interventions (medication; for depression).

Yoga appears to be effective for both low back pain and anxiety compared to other active interventions, although the anxiety finding was only from studies of women with breast cancer. Meditative movement, which includes yoga, is effective for sleep disorders, although only for older adults (there is some evidence in chronic pain and fibromyalgia populations as well).

Tai chi appears to be effective compared to usual care for low back pain, knee osteoarthritis and depression, in older people (although it appears less effective in multimorbid depressed patients). Meditative movement, which includes tai chi, is effective for sleep disorders, although only for older adults (there is some evidence in chronic pain and fibromyalgia populations as well).

There is evidence of effectiveness for mindfulness/meditation/MBSR in depression, anxiety and distress, which may apply equally to MSK populations.

## DISCUSSION

This review has highlighted the large and increasing number of systematic reviews of CAM for musculoskeletal and mental health disorders, covering 29 different CAM approaches. The MSKs with the best evidence (moderate/good quality for effectiveness in a moderate/large population, some indication of cost-effectiveness and safety) were low back pain (yoga, acupuncture, spinal manipulation/mobilisation, osteopathy, spa/balneotherapy and tai chi), myofascial trigger point pain (acupuncture), osteoarthritis (acupuncture, tai chi), neck pain (manipulation/manual therapy), fibromyalgia (acupuncture, manual therapy) and lateral epicondylitis (manual therapy). The MH conditions with the best evidence were depression (MBSR/meditation/mindfulness, tai chi, relaxation and acupuncture), anxiety (meditation/MBSR, moving meditation, yoga), sleep disorders (meditative/mind-body movement), and stress/distress (mindfulness). Very few systematic reviews considered multimorbid populations, however, acupuncture, yoga, tai chi and mindfulness/meditation/MBSR appear to have evidence for both MSK and MH conditions.

The quality of the SRs in the areas of CAM and MSK/MH was very variable, and the quality of included trials also varied widely; it is notable that none of the MH SRs concluded that trial quality was 'good' overall. Very few of the MSK SRs mentioned cost-effectiveness, and none of the mental health SRs. Future systematic reviews in the areas of CAM and MSK/MH need to ensure they include *a priori* design/protocol registration, a list of excluded studies, and conflict of interest statements, use duplicate study selection and data extraction, assess publication bias, and search for grey literature.

The key strengths of this review were its comprehensive scope which included a wide range of CAM approaches and types of MSK and MH condition, and its systematic searching techniques, using MeSH terms where possible, and search techniques to capture grey and unpublished literature. The whole project team were involved in independently screening the literature search results. We did include a quality appraisal of the reviews, although time constraints meant this was an abbreviated assessment. One of the key limitations is the pragmatic decision to only include systematic reviews, which may have led to exclusion of some CAMs, and means results are subject to the limitations of systematic review and trial methodology, study designs sometimes challenging for use with CAM.[84-86] Another key limitation is our definition of CAM as including a practitioner in its delivery (which relied on review authors reporting these details), which excluded over the counter products or self-care practices, herbal medicine in particular. We are aware that by excluding reviews published pre-2005 we may have excluded some topics. We were unable to include non-English publications.

Although CAM is commonly used by patients in the UK,[25] it is not widely available via the NHS. Given the high burden of MSK and MH conditions to individuals and society in the UK, and the prevalence of multimorbidity, CAM may be worth considering for some patients, where there is evidence of effectiveness, cost-effectiveness and safety.

One of the main aims of this study was to inform the design of a future trial for the effectiveness and cost effectiveness of an integrative medicine (IM) intervention for patients with multimorbid musculoskeletal and mental health disorders. We have identified five areas which we feel have potential:

- Yoga for low back pain, anxiety and sleep (in a population other than cancer or older adults). Since we conducted our review, a new Cochrane review has been published which suggests there is some (very low quality) evidence for yoga improving depression in low back



pain),[87] and two other SRs which support the evidence for yoga for anxiety and depression.[88 ,89] Recent randomised trials suggest that yoga can reduce pain, anxiety and sleep in low back pain[90-92] and sleep may be a mediator for some of the effects of yoga on low back pain.[93]

- MBSR/mindfulness/meditation for mental health (depression, anxiety, stress, distress), and may be effective in an MSK population, but there is a need to evaluate effectiveness in specific MSK populations. Since we conducted our review, two new SRs have been published which provide evidence for mindfulness and mental health and for mindfulness in LBP, including some evidence for mindfulness helping with depression in LBP (and FMS).[94 ,95] The majority of current mindfulness literature focuses on MH rather than physical dysfunction; most of the studies of physical conditions are not RCTs[96] - one trial has shown that mindfulness can improve psychological distress, self-efficacy, and fatigue in chronic pain from inflammatory rheumatic joint diseases,[97] but another found no difference of MSBR compared to a multidisciplinary pain intervention.[98] There is some recent pilot/feasibility evidence for mindfulness-based approaches improving depression in back pain.[99 ,100] An observational study found improvements in depression, anxiety, pain in chronic pain patients who also had MH symptoms.[101]
- Acupuncture (compared to other active interventions) in for MSK (low back pain, neck pain or fibromyalgia) and depression. Since we conducted our review two new SRs have confirmed the effectiveness of acupuncture on OA of the knee[102 ,103] and three others have identified effectiveness of acupuncture for insomnia.[104-106]
- Tai chi for low back pain or osteoarthritis and depression, possibly in older people, although there is no SR evidence in a multimorbid population (and some evidence that tai chi may be less effective for depression in those with (not just MSK) multimorbidities). A recent trial shows that tai chi reduces depression in OA of knee compared to physiotherapy.[107]
- Meditative/mind-body movement (yoga or tai chi) for sleep disorders, with perhaps chronic pain or fibromyalgia.

Systematic reviews of CAMs consistently conclude that further high quality trials in this area are needed, with long term follow up and larger sample sizes, assessing cost-effectiveness and use of appropriate, sensitive, validated outcome measures. The need for high quality trials was particularly highlighted in SRs of fibromyalgia, arthritis (both osteoarthritis and rheumatoid), sleep disorders, manual therapies and tai chi.

This scoping review suggests that the most promising CAM for future research in the areas of MSK-MH comorbidity are yoga, mindfulness, tai chi and acupuncture. The comorbid populations that would most benefit are less clear, as few studies focus on comorbidity, but may include low back pain, osteoarthritis, fibromyalgia and depression, anxiety and sleep. It is clear that, despite the volume of SRs and RCTs identified, there is still a need for further research in many areas. There is a particular need for high quality, large RCTs with long-term follow up, which include cost-effectiveness.

## Funding

The report is based on independent research commissioned and funded by the NIHR Policy Research Programme (*The Effectiveness And Cost Effectiveness Of Complementary And Alternative Medicine (Cam) For Multimorbid Patients With Mental Health And Musculoskeletal Problems In Primary Care In The UK: A Scoping*

1  
2  
3 *Study*). The views expressed in the publication are those of the author(s) and not necessarily those of  
4 the NHS, the NIHR, the Department of Health, 'arms' length bodies or other government  
5 departments.  
6  
7

## 8 **Competing interests**

9

10 No competing interests to declare

## 13 **Acknowledgements**

14

15 We are grateful to Catherine Borwick for her help with literature searching and Sandra Hollinghurst  
16 for her help with screening the papers.  
17

## 19 **Contributions**

20

21 AL conducted all literature searches, data extraction and quality appraisal, with the project  
22 team (GF, HM, PL, SM and DS) all screening papers for inclusion. The team (GF, HM, PL, SM  
23 and DS) all provided input into the inclusion/exclusion criteria. DS advised on the review  
24 process. GF, HM, PL, SM and DS were all involved in the prioritisation of topics from the  
25 review results. AL drafted the paper and all authors reviewed and edited it.  
26  
27

## 28 **Data sharing**

29

30 We are able to provide copies of searches and lists of excluded references on request.  
31  
32  
33  
34  
35  
36  
37  
38  
39  
40  
41  
42  
43  
44  
45  
46  
47  
48  
49  
50  
51  
52  
53  
54  
55  
56  
57  
58  
59  
60

## References

1. Murray CJ, Richards MA, Newton JN, et al. UK health performance: findings of the Global Burden of Disease Study 2010. *Lancet* 2013;381(9871):997-1020. doi: 10.1016/S0140-6736(13)60355-4
2. H. D. The Musculoskeletal Services Framework Y1 2006 [Available from: [http://webarchive.nationalarchives.gov.uk/20130107105354/http://www.dh.gov.uk/prod\\_consumers/dh/groups/dh\\_digitalassets/@dh/@en/documents/digitalasset/dh\\_4138412.pdf](http://webarchive.nationalarchives.gov.uk/20130107105354/http://www.dh.gov.uk/prod_consumers/dh/groups/dh_digitalassets/@dh/@en/documents/digitalasset/dh_4138412.pdf) accessed 16th May 2016.
3. Centre HSCI. Adult psychiatric morbidity in England, 2007: Results of a household survey. In: Sally McManus HM, Traolach Brugha, Paul Bebbington, Rachel Jenkins, ed., 2009.
4. Halliwell E, Main L, Richardson C. The Fundamental Facts 2007 [Available from: [http://www.mentalhealth.org.uk/content/assets/PDF/publications/fundamental\\_facts\\_2007.pdf?view=Standard](http://www.mentalhealth.org.uk/content/assets/PDF/publications/fundamental_facts_2007.pdf?view=Standard).
5. World Health Organization. Chronic diseases and health promotion: chronic rheumatic conditions 2013 [Available from: <http://www.who.int/chp/topics/rheumatic/en/> accessed 16th May 2016.
6. Health and Safety Executive. Annual Statistics Report 2011-12 2012 [Available from: <http://www.hse.gov.uk/statistics/overall/hssh1112.pdf>.
7. HM Government. No Health Without Mental Health: A cross-government mental health outcomes strategy for people of all ages 2011 [Available from: [https://www.gov.uk/government/uploads/system/uploads/attachment\\_data/file/213761/dh\\_124058.pdf](https://www.gov.uk/government/uploads/system/uploads/attachment_data/file/213761/dh_124058.pdf).
8. Dionne CE, Dunn KM, Croft PR. Does back pain prevalence really decrease with increasing age? A systematic review. *Age Ageing* 2006;35(3):229-34. doi: 10.1093/ageing/afj055 [published Online First: 2006/03/21]
9. Jeffries LJ, Milanese SF, Grimmer-Somers KA. Epidemiology of adolescent spinal pain: a systematic overview of the research literature. *Spine* 2007;32(23):2630-7. doi: 10.1097/BRS.0b013e318158d70b [published Online First: 2007/11/06]
10. Hoy D, Bain C, Williams G, et al. A systematic review of the global prevalence of low back pain. *Arthritis Rheum* 2012;64(6):2028-37. doi: 10.1002/art.34347 [published Online First: 2012/01/11]
11. Maniadakis N, Gray A. The economic burden of back pain in the UK. *Pain* 2000;84(1):95-103.
12. National Institute for Health and Clinical Excellence. Low back pain final scope 2007 [Available from: <https://www.nice.org.uk/guidance/cg88/documents/low-back-pain-final-scope2>.
13. Arthritis Research UK. Osteoarthritis in general practice 2013 [Available from: <http://www.arthritisresearchuk.org/arthritis-information/data-and-statistics/data-by-condition/osteoarthritis.aspx> accessed 16th May 2016.
14. Oxford Economics. The economic costs of arthritis for the UK economy 2010 [Available from: <http://www.oxfordeconomics.com/my-oxford/projects/128882> accessed 16th May 2015.
15. Centre HSCI. Health Survey for England 2014: Health, social care and lifestyles - Summary of key findings 2014 [Available from: <http://www.hscic.gov.uk/catalogue/PUB19295/HSE2014-Sum-bklet.pdf>.
16. Ohayon MM. Epidemiology of insomnia: what we know and what we still need to learn. *Sleep medicine reviews* 2002;6(2):97-111. [published Online First: 2003/01/18]
17. Salisbury C, Johnson L, Purdy S, et al. Epidemiology and impact of multimorbidity in primary care: a retrospective cohort study. *The British journal of general practice : the journal of the Royal College of General Practitioners* 2011;61(582):e12-21. doi: 10.3399/bjgp11X548929
18. Violan C, Foguet-Boreu Q, Flores-Mateo G, et al. Prevalence, determinants and patterns of multimorbidity in primary care: a systematic review of observational studies. *PLoS One* 2014;9(7):e102149. doi: 10.1371/journal.pone.0102149

19. Mercer S, Salisbury C, Fortin M. ABC of Multimorbidity: John Wiley & Sons 2014.
20. Barnett K, Mercer SW, Norbury M, et al. Epidemiology of multimorbidity and implications for health care, research, and medical education: a cross-sectional study. *Lancet* 2012;380(9836):37-43. doi: 10.1016/S0140-6736(12)60240-2
21. Katona C, Peveler R, Dowrick C, et al. Pain symptoms in depression: definition and clinical significance. *Clinical medicine (London, England)* 2005;5(4):390-5.
22. Fisher P. Connecting with the Strategic Agenda: integrated medicine, polypharmacy, antimicrobial resistance and multimorbidity *CAMSTRAND* 2015;CAMSTRAND
23. The House of Lords. What is Complementary and Alternative Medicine? Growing Use of CAM in the United Kingdom *Science and Technology - Sixth Report* 2000
24. Eardley S, Bishop FL, Prescott P, et al. A systematic literature review of complementary and alternative medicine prevalence in EU. *Forschende Komplementarmedizin (2006)* 2012;19 Suppl 2:18-28. doi: 10.1159/000342708 [published Online First: 2012/01/01]
25. Hunt KJ, Coelho HF, Wider B, et al. Complementary and alternative medicine use in England: results from a national survey. *Int J Clin Pract* 2010;64(11):1496-502. doi: 10.1111/j.1742-1241.2010.02484.x [published Online First: 2010/08/12]
26. Wye L, Shaw A, Sharp D. Designing a 'NHS friendly' complementary therapy service: A qualitative case study. *BMC health services research* 2008;8(1):173.
27. Fisher P, van Haselen R, Hardy K, et al. Effectiveness gaps: a new concept for evaluating health service and research needs applied to complementary and alternative medicine. *Journal of alternative and complementary medicine* 2004;10(4):627-32. doi: 10.1089/acm.2004.10.627
28. Unwin J, Peters D. Gatekeepers and the Gateway--a mixed-methods inquiry into practitioners' referral behaviour to the Gateway Clinic. *Acupuncture in medicine : journal of the British Medical Acupuncture Society* 2009;27(1):21-5. doi: 10.1136/aim.2008.000083
29. Kessler RC, Soukup J, Davis RB, et al. The use of complementary and alternative therapies to treat anxiety and depression in the United States. *American Journal of Psychiatry* 2001;158(2):289-94. doi: 10.1176/appi.ajp.158.2.289
30. Mamtani R, Cimino A. A Primer of Complementary and Alternative Medicine and Its Relevance in the Treatment of Mental Health Problems. *Psychiatr Q* 2002;73(4):367-81. doi: 10.1023/A:1020472218839
31. Eardley S, Bishop FL, Prescott P, et al. A Systematic Literature Review of Complementary and Alternative Medicine Prevalence in EU. *Forschende Komplementärmedizin / Research in Complementary Medicine* 2012;19(suppl 2)(Suppl. 2):18-28.
32. Artus M, Croft M, Lewis M. The use of CAM and conventional treatments among primary care consultants with chronic musculoskeletal pain. *BMC Fam Pract* 2007;8:26. doi: 10.1186/1471-2296-8-26
33. Arksey H, O'Malley L. Scoping studies: towards a methodological framework. *International Journal of Social Research Methodology* 2005;8(1):19-32. doi: 10.1080/1364557032000119616
34. Pham MT, Rajić A, Greig JD, et al. A scoping review of scoping reviews: advancing the approach and enhancing the consistency. *Research Synthesis Methods* 2014;5(4):371-85. doi: 10.1002/jrsm.1123
35. Shea BJ, Hamel C, Wells GA, et al. AMSTAR is a reliable and valid measurement tool to assess the methodological quality of systematic reviews. *Journal of clinical epidemiology* 2009;62(10):1013-20. doi: <http://dx.doi.org/10.1016/j.jclinepi.2008.10.009>
36. Moher D, Liberati A, Tetzlaff J, et al. Preferred reporting items for systematic reviews and meta-analyses: the PRISMA statement. *Bmj* 2009;339:b2535.
37. Cramer H, Lauche R, Haller H, et al. A systematic review and meta-analysis of yoga for low back pain. *Clinical Journal of Pain* 2013;29(5):450-60.
38. Posadzki P, Ernst E. Yoga for low back pain: a systematic review of randomized clinical trials. *Clinical Rheumatology* 2011;30(9):1257-62.

- 1  
2  
3 39. Holtzman S, Beggs R. Yoga for chronic low back pain: A meta-analysis of randomized controlled  
4 trials. *Pain Research & Management* 2013;18(5):267-72.
- 5 40. Franke H, Franke JD, Fryer G. Osteopathic manipulative treatment for nonspecific low back pain:  
6 a systematic review and meta-analysis. *BMC Musculoskeletal Disorders* 2014;15:286.
- 7 41. Furlan A, Yazdi F, Tsertsvadze A, et al. Complementary and alternative therapies for back pain II.  
8 *Evidence report/technology assessment* 2010(194):1-764.
- 9 42. Xu M, Yan S, Yin X, et al. Acupuncture for chronic low back pain in long-term follow-up: a meta-  
10 analysis of 13 randomized controlled trials. *American Journal of Chinese Medicine*  
11 2013;41(1):1-19.
- 12 43. Furlan AD, van Tulder M, Cherkin D, et al. Acupuncture and dry-needling for low back pain: an  
13 updated systematic review within the framework of the cochrane collaboration. *Spine*  
14 2005;30(8):944-63.
- 15 44. Yuan QL, Guo TM, Liu L, et al. Traditional Chinese Medicine for Neck Pain and Low Back Pain: A  
16 Systematic Review and Meta-Analysis. *PloS one* 2015;10(2):e0117146. doi:  
17 10.1371/journal.pone.0117146
- 18 45. Rubinstein Sidney M, Terwee Caroline B, Assendelft Willem JJ, et al. Spinal manipulative therapy  
19 for acute low-back pain. *Cochrane Database of Systematic Reviews* 2012; (9).  
20 <http://onlinelibrary.wiley.com/doi/10.1002/14651858.CD008880.pub2/abstract>  
21 [http://onlinelibrary.wiley.com/store/10.1002/14651858.CD008880.pub2/asset/CD008880.pdf?v=1&](http://onlinelibrary.wiley.com/store/10.1002/14651858.CD008880.pub2/asset/CD008880.pdf?v=1&t=ib3gswom&s=eb7eca6d9e95c55fc4a56961d5c3271ba098cc42)  
22 [t=ib3gswom&s=eb7eca6d9e95c55fc4a56961d5c3271ba098cc42.](http://onlinelibrary.wiley.com/store/10.1002/14651858.CD008880.pub2/asset/CD008880.pdf?v=1&t=ib3gswom&s=eb7eca6d9e95c55fc4a56961d5c3271ba098cc42)
- 23 46. Rubinstein SM, van Middelkoop M, Assendelft WJ, et al. Spinal manipulative therapy for chronic  
24 low-back pain: an update of a Cochrane review. *Spine* 2011;36(13):E825-46.
- 25 47. Dagenais S, Gay RE, Tricco AC, et al. NASS Contemporary Concepts in Spine Care: spinal  
26 manipulation therapy for acute low back pain. *Spine Journal: Official Journal of the North*  
27 *American Spine Society* 2010;10(10):918-40.
- 28 48. Pittler MH, Karagülle MZ, Karagülle M, et al. Spa therapy and balneotherapy for treating low back  
29 pain: meta-analysis of randomized trials. *Rheumatology (Oxford, England)* 2006;45(7):880-4.  
30 doi: 10.1093/rheumatology/kel018
- 31 49. Liu L, Huang QM, Liu QG, et al. Effectiveness of dry needling for myofascial trigger points  
32 associated with neck and shoulder pain: A systematic review and meta-analysis. *Archives of*  
33 *Physical Medicine and Rehabilitation* 2015;96(5):944-55.
- 34 50. Tough EA, White AR, Cummings T, et al. Acupuncture and dry needling in the management of  
35 myofascial trigger point pain: A systematic review and meta-analysis of randomised  
36 controlled trials. *European Journal of Pain* 2009;13(1):3-10.
- 37 51. Law D, McDonough S, Bleakley C, et al. Laser Acupuncture for Treating Musculoskeletal Pain: A  
38 Systematic Review with Meta-analysis. *JAMS Journal of Acupuncture and Meridian Studies*  
39 2015;8(1):2-16.
- 40 52. Corbett M, Rice S, Madurasinghe V, et al. Acupuncture and other physical treatments for the  
41 relief of pain due to osteoarthritis of the knee: Network meta-analysis. *Osteoarthritis and*  
42 *Cartilage* 2013;21(9):1290-8.
- 43 53. Manheimer E, Cheng K, Linde K, et al. Acupuncture for peripheral joint osteoarthritis. *Cochrane*  
44 *Database of Systematic Reviews* 2010(1):CD001977.
- 45 54. White A, Foster NE, Cummings M, et al. Acupuncture treatment for chronic knee pain: a  
46 systematic review. *Rheumatology* 2007;46(3):384-90.
- 47 55. Lauche R, Langhorst J, Dobos G, et al. A systematic review and meta-analysis of Tai Chi for  
48 osteoarthritis of the knee. *Complementary Therapies in Medicine* 2013;21(4):396-406.
- 49 56. Yan JH, Gu WJ, Sun J, et al. Efficacy of Tai Chi on pain, stiffness and function in patients with  
50 osteoarthritis: a meta-analysis. *PLoS ONE [Electronic Resource]* 2013;8(4):e61672.
- 51 57. Kang JW, Lee MS, Posadzki P, et al. T'ai chi for the treatment of osteoarthritis: a systematic  
52 review and meta-analysis. *BMJ Open* 2011;1(1) doi: 10.1136/bmjopen-2010-000035  
53  
54  
55  
56  
57  
58  
59  
60



- 1
- 2
- 3 58. Miller J, Gross A, D'Sylva J, et al. Manual therapy and exercise for neck pain: a systematic review. *Manual Therapy* 2010;15(4):334-54.
- 4
- 5 59. Gross A, Langevin P, Burnie SJ, et al. Manipulation and mobilisation for neck pain contrasted
- 6 against an inactive control or another active treatment. *Cochrane Database of Systematic*
- 7 *Reviews* 2015(9) doi: 10.1002/14651858.CD004249.pub4
- 8 60. D'Sylva J, Miller J, Gross A, et al. Manual therapy with or without physical medicine modalities for
- 9 neck pain: a systematic review. *Manual Therapy* 2010;15(5):415-33. doi:
- 10 10.1016/j.math.2010.04.003
- 11 61. Carlesso LC, Gross AR, Santaguida PL, et al. Adverse events associated with the use of cervical
- 12 manipulation and mobilization for the treatment of neck pain in adults: a systematic review.
- 13 *Manual Therapy* 2010;15(5):434-44.
- 14 62. Trinh K, Graham N, Gross A, et al. Acupuncture for neck disorders. *Cochrane Database of*
- 15 *Systematic Reviews* 2006:N.PAG.
- 16 63. Deare JC, Zheng Z, Xue CC, et al. Acupuncture for treating fibromyalgia. *Cochrane Database of*
- 17 *Systematic Reviews* 2013;5:CD007070.
- 18 64. Langhorst J, Klose P, Musial F, et al. Efficacy of acupuncture in fibromyalgia syndrome--a
- 19 systematic review with a meta-analysis of controlled clinical trials. *Rheumatology*
- 20 2010;49(4):778-88.
- 21 65. Cao H, Liu J, Lewith G. Traditional Chinese Medicine for treatment of fibromyalgia: a systematic
- 22 review of randomized controlled trials. *Journal of Alternative & Complementary Medicine -*
- 23 *New York* 2010;16(4):397-409.
- 24 66. Cao H, Li X, Han M, et al. Acupoint stimulation for fibromyalgia: A systematic review of
- 25 randomized controlled trials. *Evidence-based Complementary and Alternative Medicine*
- 26 2013;2013 (no pagination)(362831)
- 27 67. Bai Y, Guo Y, Wang H, et al. Efficacy of acupuncture on fibromyalgia syndrome: A Meta-analysis.
- 28 *Journal of Traditional Chinese Medicine* 2014;34(4):381-91.
- 29 68. Yuan SLK, Matsutani LA, Marques AP. Effectiveness of different styles of massage therapy in
- 30 fibromyalgia: A systematic review and meta-analysis. *Manual Therapy* 2015;20(2):257-64.
- 31 doi: 10.1016/j.math.2014.09.003
- 32 69. Li YH, Wang FY, Feng CQ, et al. Massage therapy for fibromyalgia: a systematic review and meta-
- 33 analysis of randomized controlled trials. *PLoS ONE [Electronic Resource]* 2014;9(2):e89304.
- 34 70. Bisset L, Hing W, Vicenzino B. A systematic review of the efficacy of MWM. In: Bill Vicenzino WH,
- 35 Darren Rivett, Toby Hall, ed. *Mobilisation with Movement: The Art and Science*. Australia:
- 36 Elsevier 2011:26-63.
- 37 71. de Vibe M, Bjørndal Arlid, Tipton Elizabeth, et al. *Mindfulness Based Stress Reduction (MBSR) for*
- 38 *Improving Health, Quality of Life, and Social Functioning in Adults, 2012*.
- 39 72. Goyal M, Singh S, Sibinga EM, et al. Meditation programs for psychological stress and well-being:
- 40 a systematic review and meta-analysis. *JAMA Internal Medicine* 2014;174(3):357-68.
- 41 73. Chi I, Jordan-Marsh M, Guo M, et al. Tai chi and reduction of depressive symptoms for older
- 42 adults: a meta-analysis of randomized trials. *Geriatrics & gerontology international*
- 43 2013;13(1):3-12.
- 44 74. Liu X, Clark J, Siskind D, et al. A systematic review and meta-analysis of the effects of Qigong and
- 45 Tai Chi for depressive symptoms. *Complement Ther Med* 2015;23(4):516-34. doi:
- 46 10.1016/j.ctim.2015.05.001
- 47 75. Klainin-Yobas P, Oo WN, Suzanne Yew PY, et al. Effects of relaxation interventions on depression
- 48 and anxiety among older adults: a systematic review. *Aging & mental health* 2015:1-13. doi:
- 49 10.1080/13607863.2014.997191
- 50 76. Smith CA, Hay PP, Macpherson H. Acupuncture for depression. *Cochrane Database of Systematic*
- 51 *Reviews* 2010(1):CD004046.
- 52
- 53
- 54
- 55
- 56
- 57
- 58
- 59
- 60

- 1  
2  
3 77. Zhang ZJ, Chen HY, Yip KC, et al. The effectiveness and safety of acupuncture therapy in  
4 depressive disorders: systematic review and meta-analysis. *Journal of Affective Disorders*  
5 2010;124(1-2):9-21.
- 6 78. Chen KW, Berger CC, Manheimer E, et al. Meditative therapies for reducing anxiety: A systematic  
7 review and meta-analysis of randomized controlled trials. *Depression and Anxiety*  
8 2012;29(7):545-62.
- 9 79. Krisanaprakornkit T, Krisanaprakornkit W, Piyavhatkul N, et al. Meditation therapy for anxiety  
10 disorders. *Cochrane Database of Systematic Reviews* 2006(1):CD004998.
- 11 80. Chugh-Gupta N, Baldassarre F, Vrkljan B. A systematic review of yoga for state anxiety:  
12 Considerations for occupational therapy. *Canadian Journal of Occupational Therapy*  
13 2013;80(3):150-70.
- 14 81. Kirkwood G, Rampes H, Tuffrey V, et al. Yoga for anxiety: a systematic review of the research  
15 evidence... including commentary by Ramaratnam S. *British journal of sports medicine*  
16 2005;39(12):884-91; discussion 91. doi: 10.1136/bjism.2005.018069
- 17 82. Wu W-w, Kwong E, Lan X-y, et al. The Effect of a Meditative Movement Intervention on Quality  
18 of Sleep in the Elderly: A Systematic Review and Meta-Analysis. *The Journal of Alternative*  
19 *and Complementary Medicine* 2015 doi: 10.1089/acm.2014.0251
- 20 83. Wang F, Eun-Kyoung Lee O, Feng F, et al. The effect of meditative movement on sleep quality: A  
21 systematic review. *Sleep Med Rev* 2015;30:43-52. doi: 10.1016/j.smrv.2015.12.001
- 22 84. Linde K. Can you trust systematic reviews of complementary and alternative therapies? *European*  
23 *Journal of Integrative Medicine* 2009;1(3):117-23. doi:  
24 <http://dx.doi.org/10.1016/j.eujim.2009.09.002>
- 25 85. Verhoef MJ, Lewith G, Ritenbaugh C, et al. Complementary and alternative medicine whole  
26 systems research: Beyond identification of inadequacies of the RCT. *Complementary*  
27 *therapies in medicine* 2005;13(3):206-12.
- 28 86. Carter B. Methodological issues and complementary therapies: researching intangibles?  
29 *Complementary Therapies in Nursing and Midwifery* 2003;9(3):133-39.
- 30 87. Wieland LS, Skoetz N, Pilkington K, et al. Yoga treatment for chronic non-specific low back pain.  
31 *Cochrane Database of Systematic Reviews* 2017;1:CD010671.
- 32 88. Klatte R, Pabst S, Beelmann A, et al. Effectiveness of body-oriented yoga for mental disorders.  
33 *Deutsches Arzteblatt International* 2016;113(12):195-202.
- 34 89. Cramer H, Anheyer D, Lauche R, et al. A systematic review of yoga for major depressive disorder.  
35 *Journal of Affective Disorders* 2017;213:70-77.
- 36 90. Tekur P, Nagarathna R, Chametcha S, et al. A comprehensive yoga programs improves pain,  
37 anxiety and depression in chronic low back pain patients more than exercise: An RCT.  
38 *Complementary therapies in medicine* 2012;20(3):107-18. doi:  
39 <http://dx.doi.org/10.1016/j.ctim.2011.12.009>
- 40 91. Femia A, Lemaster C, Bertisch S, et al. Change in sleep quality in a randomized controlled trial of  
41 yoga, physical therapy, and education for low-income minorities with chronic low back pain.  
42 *Journal of Alternative and Complementary Medicine* 2016;22 (6):A74-A75.
- 43 92. Telles S, Bhardwaj AK, Gupta RK, et al. A Randomized Controlled Trial to Assess Pain and  
44 Magnetic Resonance Imaging-Based (MRI-Based) Structural Spine Changes in Low Back Pain  
45 Patients After Yoga Practice. *Medical Science Monitor* 2016;22:3228-47.
- 46 93. Sherman KJ, Wellman RD, Cook AJ, et al. Mediators of Yoga and Stretching for Chronic Low Back  
47 Pain. *Evidence-Based Complementary and Alternative Medicine* 2013;2013:11. doi:  
48 10.1155/2013/130818
- 49 94. Hilton L, Hempel S, Ewing BA, et al. Mindfulness Meditation for Chronic Pain: Systematic Review  
50 and Meta-analysis. *Ann Behav Med* 2017;51(2):199-213. doi: 10.1007/s12160-016-9844-2
- 51 95. Anheyer D, Haller H, Barth J, et al. Mindfulness-Based Stress Reduction for Treating Low Back  
52 Pain: A Systematic Review and Meta-analysis. *Annals of Internal Medicine* 2017;166(11):799-  
53 807.
- 54  
55  
56  
57  
58  
59  
60

- 1  
2  
3 96. Hardison ME, Roll SC. Mindfulness Interventions in Physical Rehabilitation: A Scoping Review.  
4 *The American Journal of Occupational Therapy* 2016;70(3):7003290030p1-30p9. doi:  
5 10.5014/ajot.2016.018069
- 6 97. Zangi HA, Mowinckel P, Finset A, et al. A mindfulness-based group intervention to reduce  
7 psychological distress and fatigue in patients with inflammatory rheumatic joint diseases: a  
8 randomised controlled trial. *Annals of the Rheumatic Diseases* 2012;71(6):911-17. doi:  
9 10.1136/annrheumdis-2011-200351
- 10 98. Wong SY, Chan FW, Wong RL, et al. Comparing the effectiveness of mindfulness-based stress  
11 reduction and multidisciplinary intervention programs for chronic pain: a randomized  
12 comparative trial. *The Clinical journal of pain* 2011;27(8):724-34. doi:  
13 10.1097/AJP.0b013e3182183c6e
- 14 99. Braden BB, Pipe TB, Smith R, et al. Brain and behavior changes associated with an abbreviated 4-  
15 week mindfulness-based stress reduction course in back pain patients. *Brain and Behavior*  
16 2016;6(3):e00443.
- 17 100. Amutio A, Franco C, de Carmen Perez-Fuentes M, et al. Mindfulness training for reducing anger,  
18 anxiety, and depression in fibromyalgia patients. *Frontiers in Psychology Vol 5 2015, ArtID*  
19 *1572* 2015;5
- 20 101. Rod K. Observing the Effects of Mindfulness-Based Meditation on Anxiety and Depression in  
21 Chronic Pain Patients. *Psychiatr Danub* 2015;27 Suppl 1:S209-11.
- 22 102. Shim JW, Jung JY, Kim SS. Effects of Electroacupuncture for Knee Osteoarthritis: A Systematic  
23 Review and Meta-Analysis. *Evidence-based Complementary and Alternative Medicine*  
24 2016;2016 (no pagination)(3485875)
- 25 103. Lin X, Huang K, Zhu G, et al. The Effects of Acupuncture on Chronic Knee Pain Due to  
26 Osteoarthritis: A Meta-Analysis. *Journal of Bone & Joint Surgery - American Volume*  
27 2016;98(18):1578-85.
- 28 104. Huang KY, Liang S, Grellet A, et al. Acupuncture and moxibustion for primary insomnia: A  
29 systematic review and meta-analysis of randomized controlled trials. *European Journal of*  
30 *Integrative Medicine* 2017;12:93-107.
- 31 105. Dong B, Chen Z, Yin X, et al. The Efficacy of Acupuncture for Treating Depression-Related  
32 Insomnia Compared with a Control Group: A Systematic Review and Meta-Analysis. *BioMed*  
33 *Research International* 2017;2017:9614810.
- 34 106. Shergis JL, Ni X, Jackson ML, et al. A systematic review of acupuncture for sleep quality in  
35 people with insomnia. *Complementary Therapies in Medicine* 2016;26:11-20.
- 36 107. Wang C, Schmid CH, Iversen MD, et al. Comparative Effectiveness of Tai Chi Versus Physical  
37 Therapy for Knee Osteoarthritis: A Randomized Trial. *Annals of Internal Medicine*  
38 2016;165(2):77-86.
- 39  
40  
41  
42  
43  
44  
45  
46  
47  
48  
49  
50  
51  
52  
53  
54  
55  
56  
57  
58  
59  
60



## Appendix 1: Inclusion and exclusion criteria for review

|                               | <b>Include</b>                                                                                                                                                                                                                                                                                                                                                                                                                                                                                                                                                                                                                                                                                                                                                                          | <b>Exclude</b>                                                                                                                                                                                                                                                                                                                                                                                                                                                                                                                                                                                                                                                                                                                                                                                                                                                  |
|-------------------------------|-----------------------------------------------------------------------------------------------------------------------------------------------------------------------------------------------------------------------------------------------------------------------------------------------------------------------------------------------------------------------------------------------------------------------------------------------------------------------------------------------------------------------------------------------------------------------------------------------------------------------------------------------------------------------------------------------------------------------------------------------------------------------------------------|-----------------------------------------------------------------------------------------------------------------------------------------------------------------------------------------------------------------------------------------------------------------------------------------------------------------------------------------------------------------------------------------------------------------------------------------------------------------------------------------------------------------------------------------------------------------------------------------------------------------------------------------------------------------------------------------------------------------------------------------------------------------------------------------------------------------------------------------------------------------|
| <b>Types of review</b>        | Systematic review and/or meta-analysis                                                                                                                                                                                                                                                                                                                                                                                                                                                                                                                                                                                                                                                                                                                                                  | Non-systematic searches; clinical summaries; mechanism reviews; conceptual reviews; historical reviews; herbal monographs; opinions/editorials; reviews of qualitative studies. Reviews including case studies.                                                                                                                                                                                                                                                                                                                                                                                                                                                                                                                                                                                                                                                 |
| <b>Topic of review</b>        | Efficacy, effectiveness, cost-effectiveness, safety                                                                                                                                                                                                                                                                                                                                                                                                                                                                                                                                                                                                                                                                                                                                     | Any other focus including prevalence, mechanisms                                                                                                                                                                                                                                                                                                                                                                                                                                                                                                                                                                                                                                                                                                                                                                                                                |
| <b>CAM</b>                    | Any under the MeSH term CAM, except those in the adjacent column (acupuncture (body or ear), acupressure, electroacupuncture, laser acupuncture, Alexander technique, aromatherapy, art therapy, anthroposophy, autogenic training, balneotherapy/hydrotherapy, Bowen, chiropractic, craniosacral, emotional freedom technique, Feldenkrais, guided imagery, kinesiology, homeopathy, hypnosis, integrative medicine, massage, manual therapy or manipulation, meditation, mindfulness, moxibustion, music therapy, naturopathy, osteopathy, Pilates, qi gong, reflexology, relaxation therapy, reiki, shiatsu, spiritual therapies, spiritual healing, tai chi, therapeutic touch, traditional medicine (all types - including TCM approaches such as tuina and guasha), trager, yoga) | Those which are not considered CAM in a UK NHS setting: acoustic stimulation, bee venom acupuncture, biofeedback, breathing exercises, cell therapy, colour therapy, dance therapy, detoxification, deep transverse friction massage, diets, horticultural therapy, light therapy, leech therapy, lifestyle changes, laughter therapy, low level laser therapy (included laser acupuncture which is based on TCM acupuncture points), MBCT, mental healing, magnet therapy, NLP, neural therapy, prayer, play therapy, psychodrama, psychophysiology, prolotherapy, sensory art therapy, suggestion, transcranial magnetic stimulation, TENS rejuvenation, western medicine<br>Herbal medicine/phytotherapy, as the majority of studies do not involve a practitioner<br>Oral or topical CAM which are given to the patient without the input of a practitioner |
| <b>Intervention details</b>   | Practitioner-based CAM only<br><br>The CAM must be the main focus of the paper.                                                                                                                                                                                                                                                                                                                                                                                                                                                                                                                                                                                                                                                                                                         | Over-the-counter, online, self-help only.<br><br>CAM is only mentioned amongst a list of other active interventions                                                                                                                                                                                                                                                                                                                                                                                                                                                                                                                                                                                                                                                                                                                                             |
| <b>MSK: muscular diseases</b> | Muscular diseases                                                                                                                                                                                                                                                                                                                                                                                                                                                                                                                                                                                                                                                                                                                                                                       | Carpal tunnel; compartment syndromes; contracture; craniomandibular disorders; esinophilia-myalgia syndrome; muscle cramp; muscular abnormalities; muscle neoplasms; mitochondrial myopathies; myositis; paralysis;                                                                                                                                                                                                                                                                                                                                                                                                                                                                                                                                                                                                                                             |

|                                                                          |                                                                           |                                                                                                                                                                                                                                                                                                                                                                                   |
|--------------------------------------------------------------------------|---------------------------------------------------------------------------|-----------------------------------------------------------------------------------------------------------------------------------------------------------------------------------------------------------------------------------------------------------------------------------------------------------------------------------------------------------------------------------|
|                                                                          |                                                                           | rhabdomyolysis; spinal stenosis                                                                                                                                                                                                                                                                                                                                                   |
| <b>MSK: bone diseases</b>                                                | Osteoarthropathy                                                          | All other bone diseases                                                                                                                                                                                                                                                                                                                                                           |
| <b>MSK: rheumatic diseases</b>                                           | Arthritis, Fibromyalgia                                                   | Juvenile arthritis; rheumatic fever; sternocostoclavicular; hyperostosis; infectious arthritis; Reiter's disease; rheumatic fever                                                                                                                                                                                                                                                 |
| <b>MSK: other</b>                                                        | Musculoskeletal pain                                                      | Abdominal pain; cranial pain; ear ache; eye pain; facial pain; headache/migraine; jaw disorders; labour pain; nipple pain; neuralgia; neuropathic pain; pelvic pain; phantom limb pain; sprains                                                                                                                                                                                   |
| <b>MH</b>                                                                | Anxiety; stress; bipolar; loneliness, low mood                            | Autism; Alzheimer's; ADHD; child/domestic abuse; delusions; dementia; delirium; eating disorders; learning/intellectual disorders; OCD; Parkinson's; personality disorders; psychotic conditions; psychological trauma; PTSD; quality of life; sexual/gender disorders; substance misuse/abuse; substance abuse; schizophrenia; serious mental health; suicide; sexual disorders; |
|                                                                          | Somatoform disorders                                                      | Hypochondriasis                                                                                                                                                                                                                                                                                                                                                                   |
|                                                                          | Depression                                                                | Postpartum or premenstrual depression; postoperative depression; depressive psychosis; atypical depression                                                                                                                                                                                                                                                                        |
|                                                                          | Stress, stress management                                                 | Financial strain; oxidative stress; physiological stress; posttraumatic stress; stress incontinence                                                                                                                                                                                                                                                                               |
|                                                                          | Sleep problems, insomnia                                                  | Restless leg syndrome                                                                                                                                                                                                                                                                                                                                                             |
| <b>Other multimorbidities/ populations: serious/long term conditions</b> | Cancer; cardiovascular; diabetes; digestive issues; obesity; respiratory; | Asthma; brain injury; chronic fatigue syndrome; cystic fibrosis; epilepsy; hepatitis; HIV/AIDS; kidney disease; multiple sclerosis, stroke/post stroke; sleep apnoea                                                                                                                                                                                                              |
| <b>Other multimorbidities/ populations: acute conditions</b>             | None                                                                      | Injuries, infections                                                                                                                                                                                                                                                                                                                                                              |
| <b>Other multimorbidities/ populations: settings</b>                     | Carers                                                                    | Critical illness; intensive care; military; nursing home; palliative care; prisons; surgery                                                                                                                                                                                                                                                                                       |
| <b>Other multimorbidities/ populations: women's health</b>               | -                                                                         | Endometriosis; infertility; labour/postpartum/pregnancy; PCOS; menopause; menstrual pain; pelvic pain                                                                                                                                                                                                                                                                             |
| <b>Other</b>                                                             | -                                                                         | Memory impairment                                                                                                                                                                                                                                                                                                                                                                 |

|                                                            |                                                                                                   |                                                                     |
|------------------------------------------------------------|---------------------------------------------------------------------------------------------------|---------------------------------------------------------------------|
| <b>multimorbidities/<br/>populations:<br/>disabilities</b> | -                                                                                                 | Hearing loss/impairment                                             |
|                                                            | -                                                                                                 | Vision loss/impairment                                              |
| <b>Population</b>                                          | Adults only $\geq$ 18yrs (include if children were included but reported and analysed separately) | Animal studies or laboratory studies                                |
|                                                            | Need to be generalisable to GP population                                                         | Healthy populations or specific occupations (e.g. nurses, teachers) |
| <b>Language</b>                                            | English only                                                                                      | Any other language                                                  |
| <b>Date of publication</b>                                 | 2005 or later                                                                                     | Pre 2005                                                            |
| <b>For trial registries</b>                                | Only those which were completed and we had not picked up in other searches                        | Currently recruiting or not recruiting                              |
| <b>Country</b>                                             | Reviews including studies from Western countries                                                  | Review of studies from only non-Western countries                   |

Appendix 2

AMSTAR items reported in MSK reviews

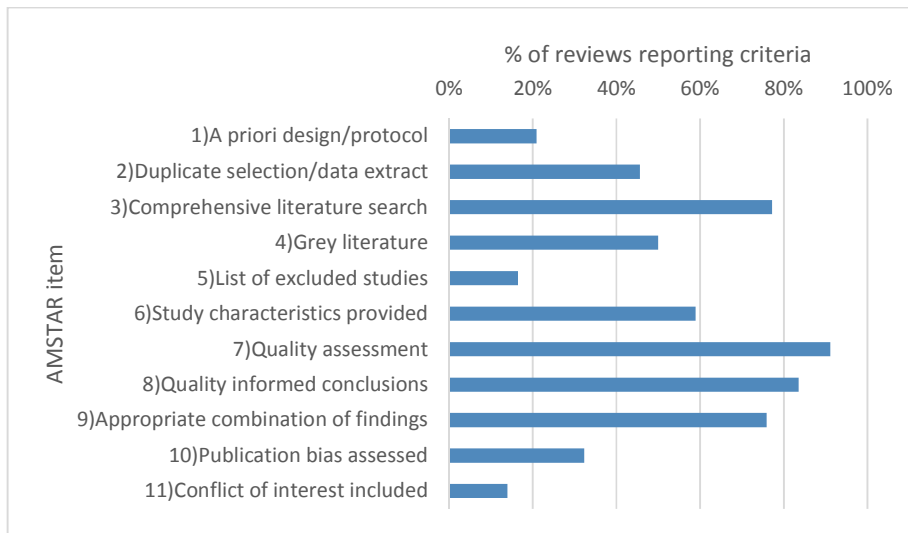

AMSTAR items reported in MH reviews

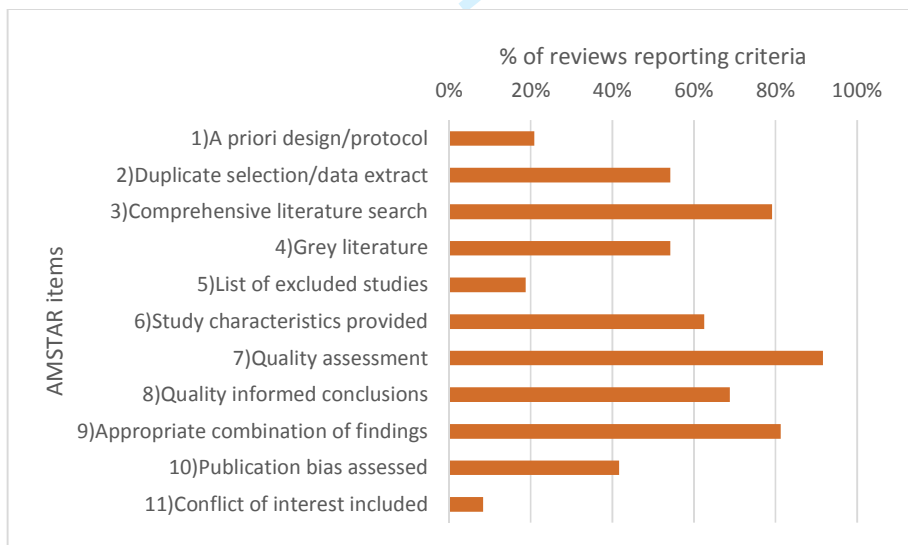

Figure 1

Figure 1: PRISMA flowchart

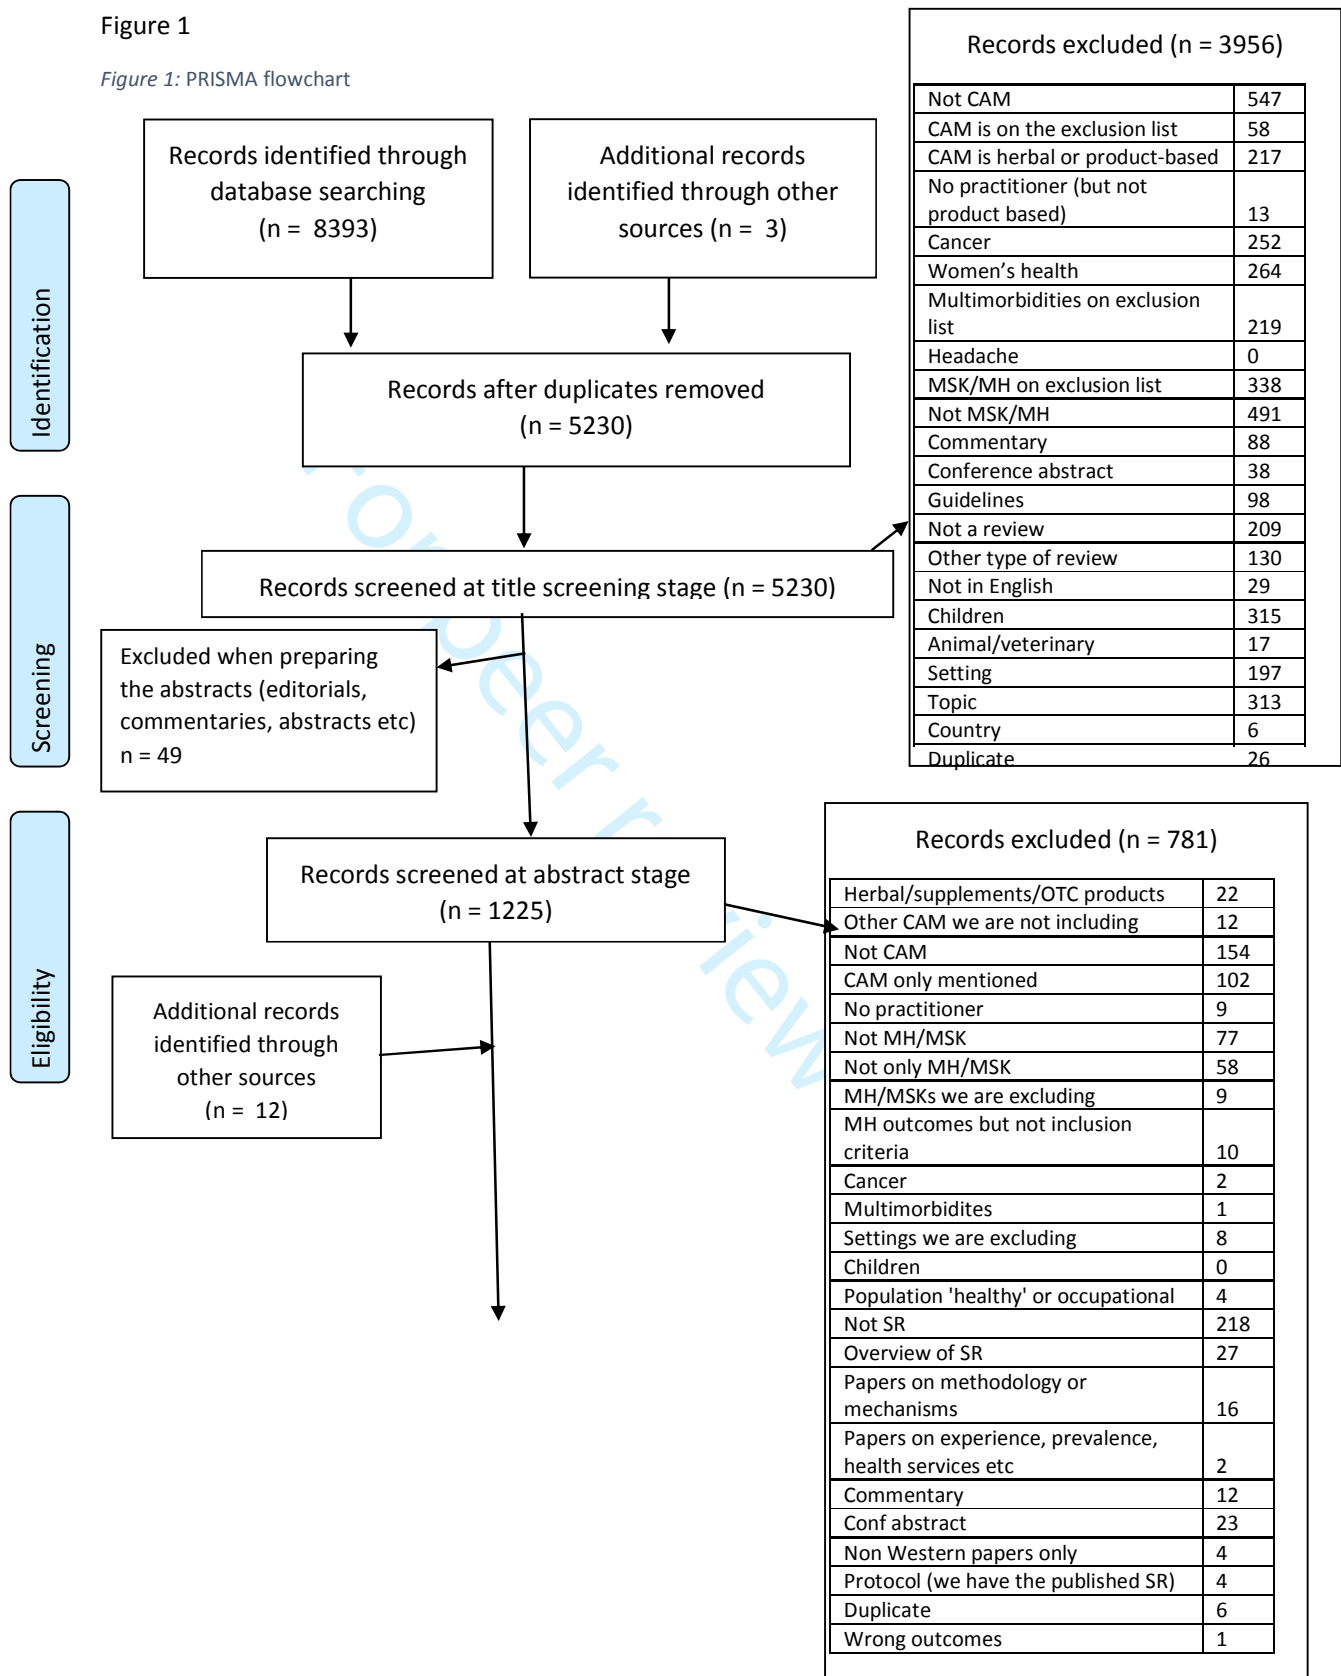

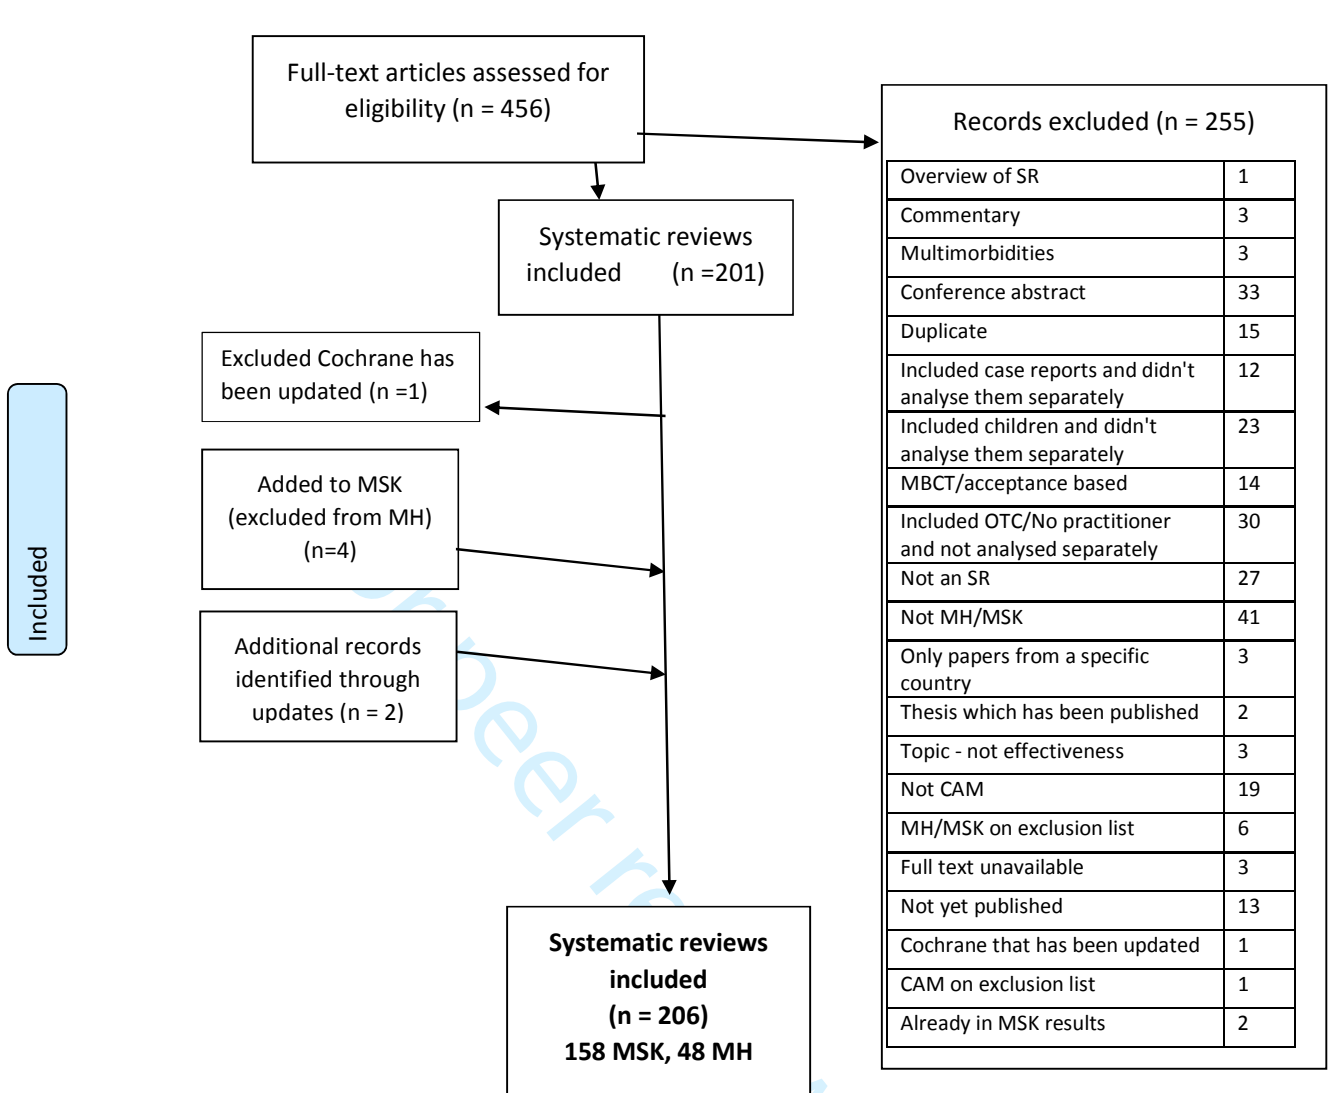

# BMJ Open

## A Scoping Review of Systematic Reviews of Complementary Medicine for Musculoskeletal and Mental Health Conditions.

|                                 |                                                                                                                                                                                                                                                                                                                                                                         |
|---------------------------------|-------------------------------------------------------------------------------------------------------------------------------------------------------------------------------------------------------------------------------------------------------------------------------------------------------------------------------------------------------------------------|
| Journal:                        | <i>BMJ Open</i>                                                                                                                                                                                                                                                                                                                                                         |
| Manuscript ID                   | bmjopen-2017-020222.R1                                                                                                                                                                                                                                                                                                                                                  |
| Article Type:                   | Research                                                                                                                                                                                                                                                                                                                                                                |
| Date Submitted by the Author:   | 26-Feb-2018                                                                                                                                                                                                                                                                                                                                                             |
| Complete List of Authors:       | Lorenc, Ava<br>Feder, Gene; University of Bristol, Community based medicine<br>MacPherson, Hugh; University of York, Health Sciences<br>Little, Paul; University of Southampton, Primary Care and Population Science;<br>Mercer, Stewart; University of Glasgow, Institute of Health and Wellbeing<br>Sharp, Deborah; University of Bristol, Population Health Sciences |
| <b>Primary Subject Heading</b>: | Complementary medicine                                                                                                                                                                                                                                                                                                                                                  |
| Secondary Subject Heading:      | Mental health, General practice / Family practice                                                                                                                                                                                                                                                                                                                       |
| Keywords:                       | COMPLEMENTARY MEDICINE, Musculoskeletal disorders < ORTHOPAEDIC & TRAUMA SURGERY, MENTAL HEALTH, PRIMARY CARE                                                                                                                                                                                                                                                           |
|                                 |                                                                                                                                                                                                                                                                                                                                                                         |

SCHOLARONE™  
Manuscripts

Peer Review Only

# A Scoping Review of Systematic Reviews of Complementary Medicine for Musculoskeletal and Mental Health conditions.

Ava Lorenc\*, Population Health Sciences, Bristol Medical School, Bristol, UK.

Gene Feder, Population Health Sciences, Bristol Medical School, Bristol, UK

Hugh MacPherson, Department of Health Sciences, University of York, York, UK

Paul Little, Primary Care and Population Sciences Unit, University of Southampton, Southampton, UK

Stewart W Mercer, General Practice and Primary Care, Institute of Health and Wellbeing, University of Glasgow, Scotland, UK

Deborah Sharp, Population Health Sciences, Bristol Medical School, Bristol, UK

\*Corresponding author: [Ava.lorenc@bristol.ac.uk](mailto:Ava.lorenc@bristol.ac.uk); 0117 3313902

Word count: 4201



## ABSTRACT

Background: Musculoskeletal (MSK) and mental health (MH) conditions cause high disease burden. Comorbidity is common, yet evidence for interventions is weak. Complementary and alternative medicine (CAM) may have a role in MSK –MH comorbidity.

Objective: To identify potentially effective CAM for MSK –MH comorbidity, by synthesising evidence on effectiveness, cost-effectiveness and safety from systematic reviews (SRs).

Design: Scoping review of systematic reviews.

Methods: We searched literature databases, registries, reference lists, and contacted key authors and professional organisations, to identify SRs of RCTs for CAM for MSK or MH. Inclusion criteria were: published after 2004, studying adults, in English and scoring > 50% on AMSTAR (quality appraisal checklist). SRs were analysed to identify research priorities, based on high-quality evidence of effectiveness, total sample size, and indication of cost-effectiveness and safety.

Results: We included 84 MSK SRs and 27 MH SRs. Only one focussed on MSK-MH comorbidity. Three reported that meditative approaches may improve MH in MSK populations. Acupuncture, yoga, tai chi and mindfulness/meditation had evidence for MSK and MH conditions. The best MSK evidence (moderate/good quality for effectiveness in a moderate/large population, indications of cost-effectiveness/safety) was for low back pain (yoga, acupuncture, spinal manipulation/mobilisation, osteopathy, spa/balneotherapy and tai chi), myofascial trigger point pain (acupuncture), osteoarthritis (acupuncture, tai chi), neck pain (manipulation/manual therapy), fibromyalgia (acupuncture, manual therapy) and lateral epicondylitis (manual therapy). The best MH evidence was for depression (meditation/mindfulness, tai chi, relaxation and acupuncture), anxiety (meditation/mindfulness, moving meditation, yoga), sleep disorders (meditative/mind-body movement), and stress/distress (mindfulness).

Conclusions: Only one SR studied MSK-MH comorbidity. Research priorities for CAM for both MSK and MH (low back pain, osteoarthritis, fibromyalgia, depression, anxiety and sleep problems) are yoga, mindfulness, tai chi and acupuncture. Despite the large number of SRs and the prevalence of comorbidity, more high quality, large RCTs in comorbid populations are needed.

## STRENGTHS AND LIMITATIONS OF THIS STUDY:

- A comprehensive scoping review covering a wide range of individual MSK and MH conditions, in the notable dearth of SRs/RCTs in comorbid populations
- This review used systematic searching and screening techniques
- Results are limited by our pragmatic choice to only include high-quality systematic reviews and definition of CAM as including a practitioner in its delivery.
- Date and language limitations may have excluded some topics.

## INTRODUCTION

Musculoskeletal (MSK) and mental health (MH) disorders are two conditions resulting in some of the highest burden in terms of disability, accounting for 30.5% and 21.1% of Years Lived with Disability respectively.[1] Both affect one in four UK adults at some point in their life.[2-4] MSK disorders lead to very high healthcare expenditure and loss of work,[5] in the UK accounting for 7.5 million working days lost annually[6] and 60% of occupational sick leave.[2] In England, it has been estimated that MH costs £105 billion, and treatment costs are expected to rise substantially.[7]

Low back pain (LBP) is one of the most common health conditions,[8-10] with a mean global general population prevalence (regardless of prevalence period) of 31% [10] and a UK prevalent population of 17.3 million, with 3.1 million adults suffering during an entire year[11], costing the NHS over £500 million/year.[12] In the UK, 8.75 million people sought primary care treatment for osteoarthritis (over a 7 year consultation period)[13] which is estimated to have resulted in £14.8 billion indirect costs.[14]

The most common MH conditions are depression and anxiety.[3 4] In England, 19% of the general adult population reported ever being diagnosed with depression and 6% ever being diagnosed with generalised anxiety disorder.[15] Insomnia is another common MH problem, affecting 6.4% of the UK general population.[16]

There is an increasing recognition of the importance of multimorbidity, that is, the co-existence of two or more physical and/or mental long-term conditions in an individual, which is becoming the norm in the UK.[17-19] In a cross-sectional study in Scotland, 8.3% of primary care patients (36% of those with multimorbidity), had both a physical and a mental health disorder[20] and around 50% of patients with depression had pain symptoms.[21] Long term MSK disorders are closely associated with multimorbidity.[22]

Complementary and alternative medicine (CAM) is “a diverse group of health-related therapies and disciplines which are not considered to be a part of mainstream medical care”, including osteopathy, chiropractic, acupuncture, herbal medicine and homeopathy.[23] Estimates of 12-month prevalence of use of any CAM are 0.3-86% in Europe[24] and 26% in England.[25]

Many MSK and MH conditions, and comorbid MSK and MH, have limited conventional treatment options - ‘effectiveness gaps’, which are potential key areas for CAM.[26 27] Both MH[28-30] and MSK[31 32] are common reasons for patients to use CAM. We used scoping methodology to identify priority areas where CAM may be useful.[33] The overall aim of scoping studies is ‘to map rapidly the key concepts underpinning a research area and the main sources and types of evidence available’ in a formal, systematic and transparent way (which is often lacking in research priority setting exercises).[34] Scoping study methodology was used to identify gaps in the research base and priorities for future research. Scoping work is an essential step in the development of a strategy for the integration of CAM with conventional care.[27] Preliminary searches showed that evidence for comorbid populations was very limited, so we chose to include independent evidence on MSK and MH conditions. This review was part of a wider scoping study, which obtained a breadth of perspectives - the results of this review were combined with findings from consultation with conventional and CAM practitioners, a public survey, and case studies of NHS provision of CAM, to inform the final choice of conditions and CAM approaches for an RCT.

## METHODS

The scoping study followed Arksey and O'Malley's [33] framework plus the refinements suggested by Levac et al.[35], Daudt et al [36] and Colquhoun et al.[37] Scoping reviews are broader and more exploratory than systematic reviews. They: review a large number of papers to map the evidence – focussing on breadth rather than detail; have few preconceived ideas regarding focus (particularly types of MSK/MH in this context); do not necessarily assess individual study quality; and use a narrative approach to analysis, rather than synthesising or aggregating quantitative data.[33] The reader is advised to refer to original SRs for more detail.

### Aims

This study aimed to identify which practitioner-based CAM have evidence for both musculoskeletal disorders (MSK) and mental health conditions (MH) in order to identify research priorities in terms of treatment choice and specific patient groups/conditions for a future pragmatic trial of comorbid MSK and MH in UK primary care. The specific aims were to:

- collate the evidence on effectiveness, cost-effectiveness and safety from recent systematic reviews (SRs) of trials of CAM for MSK and MH conditions
- identify areas where there is high quality evidence of effectiveness but sufficient uncertainty to justify a trial
- identify areas where there is also some evidence of cost-effectiveness and safety

### Searches

As this was a scoping review, we used a wide range of methods to identify SRs (published, unpublished, in progress). Literature databases were searched (see below for details of searches): AMED, Medline, EMBASE, CINAHL, PsycINFO; Index to theses; Cochrane library; Epistemonikos; SIGLE. Three trial registries were searched (UKCRN; Health service research projects in progress; Prospero). Reference lists of 'overviews of SRs' and reports (from professional/patient organisations) were searched. We emailed key authors in the field. We also asked the project team, steering group and public and patient involvement (PPI) group, and used websites/social media (university websites, Research Gate and Twitter) to access the wider research community. We asked patient and professional organisations to ask their members for any information (by email, newsletters or social media), these included: disease specific organisations e.g. Arthritis Research UK, Back Care and MIND; CAM organisations e.g. Research Council for Complementary Medicine and Complementary and Natural Healthcare Council; primary care organisations e.g. UK Royal College of General Practitioners. We presented at one conference and distributed a flyer at another. We contacted the authors of eligible conference abstracts and protocols to ascertain if the SR was available e.g. submitted or in press.

For complementary medicine we used MeSH terms or subject headings, plus additional terms for CAM which were not indexed. To ensure relevance to UK primary care, we only included CAM which involve practitioner-led treatment. We therefore excluded herbal medicine, as the majority of studies do not involve a practitioner. We included manipulation, manual therapy and mobilisation as techniques commonly practised by some CAM practitioners (as well as conventional practitioners). For musculoskeletal conditions, we used 'musculoskeletal diseases/disorders' as index terms, adding in any which were missing. For mental health, we searched for common, minor mental health disorders and symptoms, excluding long term/severe mental illnesses. Thus, words in

1  
2  
3 titles/abstracts were searched for (rather than subject headings), with reviews needing to include  
4 patients with MH symptoms/diagnoses rather than just measuring MH outcomes. Reviews related to  
5 a secondary condition such as cancer or cardiovascular disease were included if relevant for a  
6 primary care population, i.e. commonly treated in primary care e.g. diabetes, obesity, respiratory  
7 conditions but excluding HIV, stroke, critical illness.  
8

9 Database searches were conducted in June 2015 and updated in February 2016, in collaboration  
10 with a librarian. We used filters for SRs. We excluded reviews published pre-2005, in order to make  
11 the final number of papers manageable with minimal impact on our results (given that the majority  
12 of SRs were published in 2010 and after (122/158 SRs) . We only included English language reviews.  
13 Databases were searched for two topics: complementary medicine + musculoskeletal disorders and  
14 complementary medicine + mental health. See Appendix 1 for details and Box 1 for an example  
15 search.  
16  
17  
18  
19  
20  
21  
22  
23  
24  
25  
26  
27  
28  
29  
30  
31  
32  
33  
34  
35  
36  
37  
38  
39  
40  
41  
42  
43  
44  
45  
46  
47  
48  
49  
50  
51  
52  
53  
54  
55  
56  
57  
58  
59  
60

For peer review only

*Box 1: Example search (OVID Medline)*

1. "Alexander technique".tw.
2. "bowen technique".tw.
3. craniosacral.tw.
4. ("emotional freedom technique" or EFT).tw.
5. feldenkrais.tw.
6. Pilates.tw.
7. reiki.tw.
8. Shiatsu.tw.
9. trager.tw.
10. "complementary medicine".tw.
11. "integrative medicine".tw.
12. exp complementary therapies/
13. integrative medicine/
14. Manipulation, Spinal/
15. acupuncture/
16. Musculoskeletal manipulations/
17. Mindfulness/
18. 1 or 2 or 3 or 4 or 5 or 6 or 7 or 8 or 9 or 10 or 11 or 12 or 13 or 14 or 15 or 16 or 17
19. exp Musculoskeletal System/
20. exp Musculoskeletal Diseases/
21. myalgia/
22. exp back pain/
23. neck pain/
24. chronic pain/
25. headache/ or exp headache disorders, primary/
26. 19 or 20 or 21 or 22 or 23 or 24 or 25
27. ((systematic or structured or evidence or trials).ti. and ((review or overview or look or examination or update\$ or summary).ti. or review.pt.)) or (meta analysis.pt. or meta-analysis/ or "0266-4623".is.) or (reviewed systematically or systematically reviewed).tw. or (1469-493X or 1366-5278 or 1530-440X).is.
28. ("review" or "review academic" or "review tutorial").pt.
29. (medline or medlars or embase or pubmed).tw,sh.
30. (scisearch or psycinfo or psycinfo).tw,sh.
31. (psychlit or psyclit).tw,sh.
32. cinahl.tw,sh.
33. ((hand adj2 search\$) or (manual\$ adj2 search\$)).tw,sh.
34. (electronic database\$ or bibliographic database\$ or computeri#ed database\$ or online database\$).tw,sh.
35. (pooling or pooled or mantel haenszel).tw,sh.
36. (retraction of publication or retracted publication).pt.
37. (peto or dersimonian or der simonian or fixed effect).tw,sh.
38. 29 or 30 or 31 or 32 or 33 or 34 or 35 or 36 or 37
39. 28 and 38
40. meta-analysis.pt.
41. meta-analysis.sh.
42. (meta analys\$ or metaanalys\$).tw,sh.
43. (systematic\$ adj5 review\$).tw,sh.
44. (systematic\$ adj5 overview\$).tw,sh.
45. (quantitativ\$ adj5 review\$).tw,sh.
46. (quantitativ\$ adj5 overview\$).tw,sh.
47. (quantitativ\$ adj5 synthesis\$).tw,sh.
48. (methodologic\$ adj5 review\$).tw,sh.
49. (methodologic\$ adj5 overview\$).tw,sh.
50. (integrative research review\$ or research integration).tw.
51. 40 or 41 or 42 or 43 or 44 or 45 or 46 or 47 or 48 or 49 or 50
52. 27 or 39 or 51
53. 18 and 26 and 52

We used the inclusion/exclusion criteria (see Appendix 1) to screen the results from each search. This was a multi-stage process involving the whole project team. AL screened the titles of all search results, and DS checked the results, with any disagreements discussed and inclusion criteria

1  
2  
3 amended accordingly. AL then screened the abstracts, which were also independently screened by  
4 another author. Results were compared, any disagreements discussed, and the criteria again  
5 amended accordingly. Any remaining disagreements were discussed and resolved with a third  
6 author. AL then screened the full text of the agreed papers.  
7

### 8 **Data extraction**

9 AL extracted the following data from each SR: author, year, location, CAM/s, health condition/s, for  
10 MSK reviews whether MH was included and for MH reviews whether findings applied to MSK  
11 populations, methodological features (sources searched, inclusion/exclusion criteria, quality  
12 assessment), results and conclusions (effectiveness, safety, cost-effectiveness). Where possible  
13 these data were copied and pasted directly to avoid any misinterpretation.  
14  
15

### 16 **Quality appraisal of SRs**

17 Although not essential,[33] quality assessment is recommended in scoping reviews.[38] We used a  
18 limited quality appraisal to help inform prioritisation: AMSTAR, a validated checklist.[39] Due to  
19 time constraints and the number of SRs to be appraised, a simple procedure was followed, using the  
20 'search' function in the text of SRs to find particular terms. The emphasis was on obtaining relative  
21 scores, allowing ranking of the included reviews, rather than an absolute score of quality. For each of  
22 the 11 items on the AMSTAR checklist, a score of 0 was given if they did not meet the criteria, or if  
23 information was unavailable, and a score of 1 if the criteria were met. The scores were summed to  
24 give a score for each SR out of a total of 11.  
25  
26

27 Any reviews which scored 5 or less (half of the possible total) on AMSTAR were not considered in the  
28 evidence synthesis.  
29

### 30 **Analysis**

31 In line with Arksey & O'Malley's [33] framework for conducting scoping reviews, we used a  
32 'descriptive-analytical' method, based in the narrative tradition, applying a common analytical  
33 framework to the reviews. Analysis was performed by AL and all authors met regularly to discuss the  
34 process and emerging results.  
35  
36

37 Reviews were placed into a matrix of health condition/symptom vs CAM.

38 Where there was more than one SR on a similar topic, one SR was prioritised, based on recency,  
39 breadth, quality and level of analysis (e.g. meta-analysis).  
40

41 There were three steps to the analysis: 1) Extraction and narrative synthesis of data from prioritised  
42 SRs, 2) Ranking of areas (condition and CAM) using an Excel framework, 3) Analysis of sample size.  
43

44 Step 1: For each cell in the matrix, data were synthesised for:  
45

- 46 • effectiveness: the conclusions on effectiveness were extracted from the prioritised SR/s.
- 47 • quality of studies: in line with guidance on scoping reviews [33] we did not assess the  
48 quality of the individual RCTs in each SR, but synthesised the conclusions from the prioritised  
49 review (i.e. we had three categories of quality – poor, moderate or good. Moderate  
50 included SRs reporting mixed results.
- 51 • cost effectiveness: any information on cost effectiveness was synthesised across all the  
52 included reviews.
- 53 • safety: any information on safety was synthesised across all the included reviews.  
54  
55  
56  
57  
58  
59  
60

- conclusion and research priorities: conclusions were drawn from across these four domains; research priorities were extracted from each SR's conclusions and summarised regarding the need for further research and any specific suggestions on future methodology.

Step 2: We ranked the areas in the matrix (condition and CAM), based on consideration of the following criteria:

1. **Effectiveness** - areas were ranked highly where there was enough high quality evidence to establish proof of concept, but still key gaps (from the evidence synthesis). Data on effectiveness came from the conclusions of the prioritised SRs) regarding effectiveness and quality
2. **Cost** – areas where there was any indication that the intervention may have potential for cost effectiveness were ranked highly
3. **Safety** - areas where there was any indication that the intervention is safe were ranked highly
4. **Comorbidity** - any indication that the intervention may be effective for comorbid MH and MSK patients were ranked highly

Step 3: once a ranked list of areas had been compiled, information on total sample size for the prioritised SRs (i.e. total number of participants in the trials included in the SR/s) was added to allow further discrimination, classified as: small (<500 participants); medium (501 to 3000); or large (>3000).

### Patient and Public Involvement

The scoping study as a whole included a patient and public involvement (PPI) group of seven people with experience of MSK/MH issues, who advised the research team on a variety of issues as the study took shape and progressed. They met 4 times over the study period and provided input into the literature review questions, search strategy and selection criteria. The PPI group also provided ideas on ways to disseminate the findings to the general public and to patient groups.

## RESULTS

### Search results

**Error! Reference source not found.** shows the PRISMA flowchart of the searches.[40] Searches resulted in 8393 references – 4304 for MH and 4089 for MSK, plus 3 for MH identified elsewhere (a journal email update). After removing duplicates, Cochrane reviews which were withdrawn, Cochrane reviews which had been updated, or those not in English, 5230 records remained for title screening. This resulted in 486 MH and 739 MSK records for the abstract screening phase. We then excluded 49 (13 MH and 36 MSK) records i.e. editorials, commentaries, abstracts etc. After abstract screening, there remained 444 studies (180 MH and 264 MSK). At this stage, a further 12 records were added – 3 from grey literature (Prospero/Sigle/HSRProj), 5 from conference abstracts, and 4 from the reference lists of overviews of SRs and other key reports. This produced 456 records to be screened at the full text stage, after which 206 records remained: 48 MH, 158 MSK.

During screening at the title stage (AL and DS) there were 49 disagreements (out of 4411 records; 1%). During abstract screening (AL and each of the 6 authors) there were a total of 296 initial



1  
2  
3 disagreements (out of 1165 records; 25%). Most were resolved by discussion without requiring a  
4 third reviewer.

5  
6 Of the 158 MSK systematic reviews, 84 were included as high quality (scored 6 or more on AMSTAR):  
7 Low back pain,[41-70] fibromyalgia,[71-82] neck pain,[41 83-91] osteoarthritis,[92-102] rheumatoid  
8 arthritis,[98 103-106] general MSK pain/conditions,[107-111] shoulder pain/disorders,[112-116]  
9 myofascial trigger point pain,[107 117 118] and other MSD conditions.[107 119-124]

10  
11 The 158 reviews covered 17 different CAMs and 15 different disorders. The overall matrix is shown  
12 below in Table 1. Low back pain was by far the most common topic, addressed by 64/158 (40%) of  
13 reviews. Fibromyalgia was the next most common, followed by osteoarthritis then neck  
14 pain/disorders. Acupuncture was the most common CAM studied (58/158 SRs; 37%), followed by  
15 manual therapy (including manipulation and mobilisation). The mean AMSTAR score for  
16 methodological quality of MSK reviews was 6/11 (ranging from 0 to 11). Appendix 2 shows which  
17 items on the AMSTAR checklist were reported by the reviews.  
18  
19  
20  
21  
22  
23  
24  
25  
26  
27  
28  
29  
30  
31  
32  
33  
34  
35  
36  
37  
38  
39  
40  
41  
42  
43  
44  
45  
46  
47  
48  
49  
50  
51  
52  
53  
54  
55  
56  
57  
58  
59  
60



| Table 1: Matrix of MSK reviews (numbers = number of reviews) |                                                 | LBP          |              | Fibro-myalgia |              | Neck pain/disorders |              | Osteo arthritis |              | Rheumatoid arthritis |              | MSK pain/conditions |              | Myofascial pain |              | Shoulder pain/disorder |              | Other        |              | Total <sup>1</sup> |
|--------------------------------------------------------------|-------------------------------------------------|--------------|--------------|---------------|--------------|---------------------|--------------|-----------------|--------------|----------------------|--------------|---------------------|--------------|-----------------|--------------|------------------------|--------------|--------------|--------------|--------------------|
|                                                              |                                                 | Total number | High quality | Total number  | High quality | Total number        | High quality | Total number    | High quality | Total number         | High quality | Total number        | High quality | Total number    | High quality | Total number           | High quality | Total number | High quality |                    |
| Acupuncture related                                          | Acupressure                                     | 2            | 2            |               |              | 2                   | 1            |                 |              |                      |              | 1                   | 1            |                 |              |                        |              | 1            | 0            | 6                  |
|                                                              | Acupuncture                                     | 12           | 6            | 9             | 6            | 5                   | 2            | 10              | 6            | 4                    | 2            | 4                   | 2            | 6               | 3            | 2                      | 1            | 6            | 5            | 58                 |
|                                                              | Moxibustion                                     | 1            | 0            | 1             | 0            |                     |              | 1               | 0            | 2                    | 1            |                     |              |                 |              |                        |              | 1            | 0            | 6                  |
| Manipulation                                                 | Chiropractic                                    | 2            | 1            | 3             | 1            |                     |              | 1               | 0            |                      |              |                     |              | 1               | 0            |                        |              |              |              | 7                  |
|                                                              | Manual therapy/spinal manipulation/mobilisation | 12           | 9            | 8             | 4            | 14                  | 9            | 2               | 1            |                      |              | 1                   | 0            | 1               | 0            | 5                      | 3            | 3            | 2            | 46                 |
|                                                              | Osteopathy                                      | 3            | 2            | 2             | 1            |                     |              |                 |              |                      |              | 1                   | 1            |                 |              |                        |              |              |              | 6                  |
| Other                                                        | Integrative therapies/Multiple CAM              | 2            | 2            | 2             | 2            |                     |              |                 |              |                      |              |                     |              |                 |              |                        |              |              |              | 4                  |
|                                                              | Tai chi                                         | 1            | 1            | 1             | 0            | 1                   | 0            | 7               | 5            | 3                    | 1            | 1                   | 1            |                 |              |                        |              |              |              | 14                 |
|                                                              | Qigong                                          |              |              |               |              | 1                   | 0            | 1               | 0            | 1                    | 0            |                     |              |                 |              |                        |              |              |              | 3                  |
|                                                              | Pilates                                         | 10           | 5            |               |              |                     |              |                 |              |                      |              |                     |              |                 |              |                        |              |              |              | 10                 |
|                                                              | CAM exercise                                    |              |              | 2             | 2            |                     |              |                 |              |                      |              |                     |              |                 |              |                        |              |              |              | 2                  |
|                                                              | Yoga                                            | 8            | 4            | 1             | 1            | 1                   | 0            | 3               | 0            | 1                    | 0            | 1                   | 1            |                 |              |                        |              |              |              | 15                 |
|                                                              | Mindfulness/meditation                          | 2            | 0            | 5             | 3            |                     |              |                 |              | 2                    | 0            | 4                   | 2            |                 |              |                        |              |              |              | 13                 |
|                                                              | Relaxation                                      |              |              | 3             | 1            |                     |              | 1               | 0            | 1                    | 0            | 1                   | 0            |                 |              |                        |              |              |              | 6                  |
|                                                              | Hypnotherapy                                    | 1            | 0            | 1             | 1            |                     |              | 1               | 0            | 1                    | 0            |                     |              |                 |              |                        |              |              |              | 4                  |
|                                                              | Spa therapy/balneotherapy                       | 2            | 1            | 2             | 1            |                     |              |                 |              | 1                    | 1            |                     |              |                 |              |                        |              |              |              | 5                  |
|                                                              | TCM bodywork                                    | 2            | 1            |               |              | 1                   | 0            |                 |              |                      |              | 1                   | 0            |                 |              |                        |              |              |              | 4                  |
| Massage/therapeutic touch                                    | 4                                               | 2            |              |               | 4            | 2                   | 1            | 0               | 1            | 0                    | 1            | 0                   |              |                 | 1            | 0                      | 1            | 1            | 13           |                    |
| Homeopathy                                                   |                                                 |              | 2            | 0             |              |                     |              |                 |              |                      |              |                     |              |                 |              |                        |              |              | 2            |                    |
| <b>Total<sup>1</sup></b>                                     |                                                 | <b>64</b>    | <b>36</b>    | <b>42</b>     | <b>23</b>    | <b>29</b>           | <b>14</b>    | <b>28</b>       | <b>12</b>    | <b>17</b>            | <b>5</b>     | <b>16</b>           | <b>8</b>     | <b>8</b>        | <b>3</b>     | <b>8</b>               | <b>4</b>     | <b>12</b>    | <b>8</b>     | <b>158</b>         |



Of the 48 MH systematic reviews, 27 were high quality (scored 6 or more on AMSTAR): depression, [125-135] anxiety,[125 126 130 134 136-143] sleep,[144-151] stress,[125 126 141] and other.[125] The 49 reviews covered 18 different CAMs and five different categories of MH symptom or disorder. The overall matrix is shown below in Table 2. Many of the reviews included more than one MH condition. Of the 48 reviews 36 (75%) included depression. Meditation, yoga, acupuncture and meditative movement were the most common CAM. Appendix 2 shows which items on the AMSTAR checklist were reported by the reviews.

| Table 2 : Matrix of MH reviews (numbers = number of reviews) |                                                   | Depression   |              | Anxiety      |              | Stress       |              | Insomnia / sleep |              | Distress (psychological) |              | Total <sup>1</sup> |
|--------------------------------------------------------------|---------------------------------------------------|--------------|--------------|--------------|--------------|--------------|--------------|------------------|--------------|--------------------------|--------------|--------------------|
|                                                              |                                                   | Total number | High quality | Total number | High quality | Total number | High quality | Total number     | High quality | Total number             | High quality |                    |
| <b>Acupuncture</b>                                           | Acupuncture                                       | 9            | 3            | 2            | 1            |              |              | 2                | 1            |                          |              | 6                  |
|                                                              | Auricular acupuncture                             |              |              |              |              |              |              | 3                | 1            |                          |              | 4                  |
| <b>Multiple</b>                                              | CAM (multiple) (did not separate CAM in analysis) | 1            | 0            | 1            | 0            |              |              | 2                | 1            |                          |              | 4                  |
| <b>Meditation/ mindfulness</b>                               | Mindfulness                                       | 3            | 2            | 1            | 1            | 1            | 1            |                  |              | 1                        | 1            | 5                  |
|                                                              | Meditation                                        |              |              | 3            | 3            | 1            | 1            | 1                | 0            |                          |              | 9                  |
| <b>Exercise</b>                                              | Meditative Movement                               |              |              |              |              |              |              | 3                | 3            |                          |              | 6                  |
|                                                              | Qigong                                            | 4            | 1            | 2            | 1            | 1            | 1            |                  |              |                          |              | 5                  |
|                                                              | Tai chi                                           | 4            | 2            | 1            | 0            |              |              | 3                | 1            |                          |              | 5                  |
|                                                              | Yoga                                              | 4            | 2            | 3            | 3            | 1            | 0            | 1                | 0            |                          |              | 8                  |
| <b>Other</b>                                                 | Homeopathy                                        |              |              |              |              |              |              | 1                | 1            |                          |              | 2                  |
|                                                              | Hypnosis                                          | 2            | 0            |              |              |              |              | 2                | 2            |                          |              | 4                  |
|                                                              | Music therapy                                     | 3            | 2            | 1            | 1            |              |              |                  |              |                          |              | 2                  |
|                                                              | Relaxation                                        | 3            | 1            | 1            | 1            |              |              | 1                | 1            |                          |              | 4                  |
|                                                              | Reflexology                                       |              |              |              |              |              |              | 1                | 0            |                          |              | 1                  |
|                                                              | Reiki                                             | 1            | 1            | 1            | 1            |              |              |                  |              |                          |              | 2                  |
|                                                              | Spinal manipulation                               |              |              |              |              |              |              |                  |              |                          |              | 0                  |
|                                                              | Massage/Therapeutic touch                         | 2            | 1            | 2            | 2            |              |              |                  |              |                          |              | 4                  |
| Morita therapy                                               |                                                   |              | 1            | 1            |              |              |              |                  |              |                          |              | 2                  |
| <b>Total<sup>1</sup></b>                                     |                                                   | <b>36</b>    | <b>15</b>    | <b>19</b>    | <b>15</b>    | <b>4</b>     | <b>3</b>     | <b>20</b>        | <b>11</b>    | <b>1</b>                 | <b>1</b>     | <b>48 (27)</b>     |
| 1. Note that reviews can occur in more than one row/column   |                                                   |              |              |              |              |              |              |                  |              |                          |              |                    |

The following sections present a summary of the areas where we found moderate/good quality evidence of effectiveness (from the prioritised SRs), and where there was some indication of cost-effectiveness and safety (from any of the included SRs).

## Evidence for MSK disorders

The highest ranked MSK disorders were low back pain, myofascial trigger point pain, osteoarthritis (OA), neck pain, fibromyalgia and lateral epicondylitis. All other combinations of condition/CAM/comparator were either poor quality, ineffective, or moderate quality but harmful. It should be noted that the quality of evidence is based on the overall assessment of quality of the included RCTs by the SR authors, which is subject to some limitations.

### Low back pain

There was good quality evidence in a medium size population for:

- yoga for low back pain – four high-quality reviews.[52 61-63] The prioritised review found evidence for yoga compared to any control, for pain, global improvement and disability in the short-term.[63] There is some evidence of safety (no serious adverse events associated with the yoga),[52 61 63] although none on cost-effectiveness. Evidence for long term effects or compared to other active interventions is of moderate quality.[63]
- osteopathy for low back pain – two high-quality reviews [65 66]. The prioritised review found evidence for osteopathy compared to spinal manipulation/heat/physical therapy, although there is some evidence of harm (2 studies reported minor adverse events).[66]

There was moderate quality evidence in a large population for:

- acupuncture for low back pain – six high-quality reviews.[42 50 51 54 55 152] The prioritised reviews found evidence for acupuncture compared to usual care (for pain, function, wellbeing, disability, ROM, quality of life) and placebo (for pain and quality of life; negative evidence for disability).[51 152] There was some evidence of safety (5% minor adverse events and no serious adverse events)[54 55] and cost-effectiveness (in the short term relative to usual care and to usual care in subjects with back pain).[152]
- spinal manipulation/mobilisation for low back pain – nine high-quality reviews.[42-44 46-49 152 153] The prioritised reviews found evidence compared to other active interventions, although results only apply for chronic low back pain.[44 45 152] There was some evidence of safety (one review identified serious adverse events,[153] but this appeared unrelated to treatment. Minor adverse events included muscle soreness, stiffness, and/or transient increase in pain).[43-45 66 152]

There was moderate quality evidence in a small population for:

- spa/balneotherapy for low back pain – one high-quality review[53] which found evidence compared to medication/exercise (balneotherapy) or usual care (spa therapy), and some evidence it is safe (no adverse events from one study).[53]
- tai chi for low back pain – one high-quality review [55], which found evidence compared to usual care, but nothing on safety, costs or impact on MH outcomes.[55]

### Myofascial trigger point pain

Acupuncture for myofascial trigger point pain – three high-quality reviews [107 117 118]. The prioritised review found good quality evidence in a medium size population compared to placebo and other active interventions for pain in the short and medium term but not in the long term.[118] However, there was no evidence for safety, cost-effectiveness, or impact on MH outcomes.[107 117 118]

### Osteoarthritis

There was good quality evidence for:

- Acupuncture for OA - six high-quality reviews.[92-97] The prioritised reviews found evidence in a large population for acupuncture for knee or peripheral joint OA compared to placebo for pain.[93 95] There is some evidence of harm (up to 45% frequency of minor adverse events).[92 93]
- Tai chi for OA – five high-quality reviews.[98-102] The prioritised review found evidence in a small population for tai chi for knee OA, compared to usual care or any control, for pain, physical function and stiffness, and physical quality of life, but only in the short term.[100] Some evidence of safety (SRs concluded tai chi is safe).[99-101]

### Neck pain

Seven high-quality reviews on manual therapy/manipulation.[83-89 152] For manual therapy plus exercise compared to exercise alone there was good quality evidence in a medium sized population for pain and QoL,[88] and moderate quality evidence in a large population for manipulation compared to medication (but not mobilisation) (cervical manipulation) for pain and function, or any control (thoracic manipulation) for pain.[83] There was moderate quality evidence in a medium sized population for a range of other techniques.[83 88 89] There is some evidence of cost-effectiveness (reduced cost of therapy),[88 89] but also some evidence of potential harm (minor adverse events and rare but devastating adverse effects from manipulation).[83 84]

Two high-quality reviews considered acupuncture for neck pain[152 154]. The prioritised review found moderate quality evidence in a medium sized population compared to placebo or usual care for pain.[90] No evidence of cost-effectiveness.[152]

### Fibromyalgia

Five high-quality reviews reported findings for acupuncture.[71-73 75 155] The prioritised review found moderate quality evidence in a small population compared to placebo for stiffness (acupuncture) and for pain and sleep disorders (electroacupuncture), and poor quality evidence in a small population compared to usual care for pain (electroacupuncture).[73] However, there was some evidence that acupuncture is less effective than usual care for MH outcomes in fibromyalgia.[73] There is some evidence of safety (no serious adverse events)[71-73 75 156] but none of cost effectiveness.

Four high-quality reviews provided data on manual therapy.[72 76-78] The prioritised review found poor quality evidence existed in a small population for manual therapy (myofascial release) for both pain and MH (anxiety and depression) compared to placebo.[78] Some evidence of safety (no adverse events)[77] but no evidence of cost-effectiveness.

### Lateral epicondylitis

One high-quality review [157] found moderate quality evidence (but the sample size was not reported) for manual therapy (mobilisation with movement) for pain free grip strength and pressure pain threshold in lateral epicondylitis, although no evidence of safety.[157]

### Evidence for mental health

No reviews provided good quality evidence for CAM for any MH condition nor any evidence of cost-effectiveness, mainly because the latter was not reported.

### Depression

There were two high-quality reviews on mindfulness/meditation for depression.[126 158] Both were prioritised and found moderate quality evidence in a medium size population for MBSR (mindfulness based stress reduction) for depression compared to usual care[125] and for meditation compared to other active interventions,[126] as well as some evidence of effectiveness for both in MSK populations.[125 126] Evidence for mindfulness meditation (other than MBSR/meditation) for depression was poor quality in a medium sized population but there was some evidence of

effectiveness in MSK populations.[126]. Meditation for depression appears safe, as although few meditation trials reported harms, one SR found that 9 trials found no adverse events. [126]

Two high-quality reviews reported on tai chi for depression.[133 135] Both were prioritised and found for older adults, there was moderate quality evidence in a medium sized population for depression, compared to usual care,[135] although it may be less effective in comorbid populations (including some MSK conditions).[133]

There was one high-quality review on relaxation for depression.[130] There was moderate quality evidence (sample size not reported) compared to any control, but no evidence of safety or cost-effectiveness.[130]

Three high-quality reviews provided data on acupuncture for depression.[127-129] The prioritised review found poor quality evidence in a medium sized population compared to medication,[127] with some evidence of safety (no serious adverse events, fewer side effects than antidepressants).[127 128]

### Anxiety

There was moderate quality evidence in a medium sized population for:

- meditation for anxiety – three high-quality reviews.[126 138 139] The prioritised review found evidence compared to usual care, placebo or other active interventions.[139] Moving meditation was more effective than static meditation.[139]
- MBSR for anxiety – one high-quality review,[158] which found evidence compared to usual care[125]
- yoga for anxiety – three high-quality reviews.[130 137 159] The prioritised review found evidence for yoga but only for women with breast cancer,[137] and nothing on safety.[136]

Three SRs mentioned that MBSR/meditation appeared safe for anxiety.[126 138 139] Two SRs found that MBSR/meditation was also effective for anxiety (as an outcome) in an MSK population.[125 126]

### Sleep disorders

Three high-quality reviews considered meditative/mind-body movement for sleep.[145 146 160] The prioritised review found for older adults, there was moderate quality evidence in a medium sized population, compared to usual care and other active interventions.[144] There was some evidence of safety (no adverse events),[144] and effect on sleep quality in an MSK population.[146]

### Stress and distress

There was moderate quality evidence in a medium sized population for:

- mindfulness for stress – one high-quality review,[158] compared to usual care and placebo, and some evidence of effectiveness on stress as an outcome in an MSK population.[125]
- mindfulness for distress– one high-quality review ,[158] compared to usual care, and some evidence of effectiveness on distress as an outcome in an MSK population.[125]

There was only poor quality evidence for all other combinations of condition/CAM/comparator.

### Evidence for effectiveness in comorbidity /MH outcomes in MSK

Only one SR provided data on comorbid MSK and MH conditions (depression and a variety of comorbid MSK conditions)[133]. Three SRs provided data on MH outcomes in MSK populations (but did not specify a MH score/diagnosis as inclusion criteria). Tai chi for depression and comorbid

conditions (including MSKs) may be less effective than non-comorbid;[133] MBSR/meditation was effective for MH outcomes in an MSK population;[125 126] meditative/mind-body movement was effective for sleep outcomes in an MSK population;[146] and mindfulness was effective for stress/distress outcomes in an MSK population.[125]

## CAM with evidence for both MSK and MH conditions

From the above synthesis, CAM with evidence for both MSK and MH conditions are:

- Acupuncture, however, for MSKs (low back pain, neck pain and fibromyalgia), the effects are compared to usual care and for MH (depression) they are only compared to other active interventions (medication).
- Yoga appears to be effective for both low back pain and anxiety compared to other active interventions, although the anxiety finding was only from studies of women with breast cancer. Meditative movement, which includes yoga, is effective for sleep disorders, although only for older adults (there is also some evidence in chronic pain and fibromyalgia populations).
- Tai chi appears to be effective compared to usual care for low back pain, knee osteoarthritis and depression, in older people (although it appears less effective in comorbid depressed patients). Meditative movement, which includes tai chi, is effective for sleep disorders, although only for older adults (there is some evidence in chronic pain and fibromyalgia populations as well).
- There is evidence of effectiveness for mindfulness/meditation/MBSR in depression, anxiety and distress, which may apply equally to MSK populations.

## Update

Since completing this review, we searched for recent SRs and RCTs on the highest ranking topics. These new studies either provide additional evidence for MH outcomes in an MSK population, or evidence supporting our original conclusions.

- Yoga. A new Cochrane review has been published which suggests there is some (very low quality) MH evidence for yoga improving depression (as an outcome not a diagnosis) in low back pain),[161] and two other SRs which support the evidence for yoga for anxiety and depression.[162 163] Recent RCTs suggest that yoga can reduce pain, anxiety and sleep in low back pain[164-166] and sleep may be a mediator for some of the effects of yoga on low back pain.[167]
- MBSR/mindfulness/meditation. Two new SRs provide evidence for mindfulness and MH and for mindfulness in LBP, including some evidence for mindfulness helping with depression (as an outcome not a diagnosis) in LBP (and FMS).[168 169] One trial has shown that mindfulness can improve psychological distress, self-efficacy, and fatigue in chronic pain from inflammatory rheumatic joint diseases,[170] but another found no difference of MSBR compared to a multidisciplinary pain intervention.[171] There is some recent pilot/feasibility evidence for mindfulness-based approaches improving depression in back pain.[172 173]
- Acupuncture (compared to other active interventions). Two new SRs confirm the effectiveness of acupuncture on OA of the knee[174 175] and three others have identified effectiveness of acupuncture for insomnia.[176-178]
- Tai chi. A recent trial shows that tai chi reduces depression in OA of knee compared to physiotherapy.[179]



## DISCUSSION

This scoping review has highlighted the large and increasing number of systematic reviews of CAM for MSK and MH disorders, covering 29 different CAM approaches, but identified no high-quality SR evidence for CAM for MSK-MH comorbid populations. Three reviews showed that MBSR/meditation/meditative movement may improve MH outcomes in MSK populations. Acupuncture, yoga, tai chi and mindfulness/meditation have evidence for both MSK and MH conditions. The MSKs with the best evidence (moderate/good quality for effectiveness in a moderate/large population, some indication of cost-effectiveness and safety) were low back pain (yoga, acupuncture, spinal manipulation/mobilisation, osteopathy, spa/balneotherapy and tai chi), myofascial trigger point pain (acupuncture), osteoarthritis (acupuncture, tai chi), neck pain (manipulation/manual therapy), fibromyalgia (acupuncture, manual therapy) and lateral epicondylitis (manual therapy). The MH conditions with the best evidence were depression (MBSR/meditation/mindfulness, tai chi, relaxation and acupuncture), anxiety (meditation/MBSR, moving meditation, yoga), sleep disorders (meditative/mind-body movement), and stress/distress (mindfulness).

The quality of the SRs was very variable. We used a quality tool, AMSTAR, which itself has some limitations, as it includes both methodological and reporting items which are not all necessarily equal in importance, and some of which can be difficult to interpret. Future reviews may consider prioritising certain items on AMSTAR, using the new version of AMSTAR,[180] or using an alternative checklist such as Cochrane or GRADE.

The quality of included trials also varied greatly; it is notable that none of the MH SRs concluded that trial quality was 'good' overall. In addition, assessment of individual RCT study quality is likely to have varied between SR authors, a common issue with CAM studies which rarely fit conventional quality criteria (particularly blinding). Very few of the MSK SRs and none of the mental health SRs mentioned cost-effectiveness. Safety was rarely adequately reported in SRs or the studies they included. Future systematic reviews in the areas of CAM and MSK/MH need to ensure they include *a priori* design/protocol registration, a list of excluded studies, and conflict of interest statements, and use duplicate study selection and data extraction, assess publication bias, and search for grey literature.

Both a strength and limitation of this scoping review was its comprehensive scope which included a wide range of CAM approaches and types of MSK and MH condition, but limited the depth of analysis and discussion.

Other key strengths were the systematic searching techniques, prioritising high-quality SRs using MeSH terms where possible, and search techniques to capture grey and unpublished literature. The whole project team were involved in independently screening the literature search results, although a limitation was that only one author conducted data extraction. We included a quality appraisal of the reviews, although time constraints meant this was an abbreviated assessment. One of the key limitations was the pragmatic decision to only include systematic reviews, which may have led to the exclusion of some CAMs, and means results are subject to the limitations of systematic review and trial methodology, study designs which are sometimes challenging for CAM.[181-183] Another key limitation is our definition of CAM as including a practitioner in its delivery (which relied on review authors reporting these details), which excluded over the counter products or self-care practices,



herbal medicine in particular, but was necessary to limit the scope of the review to CAM which may be appropriate for an integrative care model using referral from a GP. We are aware that by excluding reviews published pre-2005 we may have excluded some topics. We were unable to include non-English publications.

Although CAM is commonly used by patients in the UK,[25] it is not widely available via the NHS. Given the high burden of MSK and MH conditions to individuals and society in the UK, and the prevalence of comorbidity, CAM may be worth considering for some patients, where there is evidence of effectiveness, cost-effectiveness and safety.

One of the main aims of this study was to inform the design of a future trial to assess the effectiveness and cost effectiveness of an integrative medicine (IM) approach for patients with comorbid musculoskeletal and mental health disorders. We have identified four CAM which we feel have potential as they have good evidence in both MSK and MH conditions/symptoms from our scoping review, which was confirmed by update searches – yoga, MBSR/mindfulness/meditation, acupuncture, and tai chi. These results will be combined with the views of conventional and CAM practitioners, the public and NHS providers, to inform the final focus for an RCT.

Systematic reviews of CAMs consistently conclude that further high quality trials are needed, with longer follow up and larger sample sizes, assessing cost-effectiveness and use of appropriate, sensitive, validated outcome measures.

This scoping review suggests that the most promising CAM for future research in the areas of MSK-MH comorbidity are yoga, mindfulness, tai chi and acupuncture. The comorbid populations that would most benefit are less clear, as so few reviews focus on comorbidity, but may include low back pain, osteoarthritis, fibromyalgia and depression, anxiety and sleep.

## Funding

The report is based on independent research commissioned and funded by the NIHR Policy Research Programme (*The Effectiveness And Cost Effectiveness Of Complementary And Alternative Medicine (Cam) For Multimorbid Patients With Mental Health And Musculoskeletal Problems In Primary Care In The UK: A Scoping Study*). The views expressed in the publication are those of the author(s) and not necessarily those of the NHS, the NIHR, the Department of Health, 'arms' length bodies or other government departments.

## Competing interests

No competing interests to declare

## Acknowledgements

We are grateful to Catherine Borwick for her help with literature searching and Sandra Hollinghurst for her help with screening the papers. We are also very grateful to our PPI group.

## Contributions

1  
2  
3 AL conducted all literature searches, data extraction and quality appraisal, with the project team  
4 (GF, HM, PL, SM and DS) all screening papers for inclusion. The team (GF, HM, PL, SM and DS) all  
5 provided input into the inclusion/exclusion criteria. DS advised on the review process. GF, HM, PL,  
6 SM and DS were all involved in the prioritisation of topics from the review results. AL drafted the  
7 paper and all authors reviewed and edited it.  
8

## 9 **Data sharing**

10  
11 We are able to provide copies of searches and lists of excluded references on request.  
12  
13  
14  
15  
16  
17  
18  
19  
20  
21  
22  
23  
24  
25  
26  
27  
28  
29  
30  
31  
32  
33  
34  
35  
36  
37  
38  
39  
40  
41  
42  
43  
44  
45  
46  
47  
48  
49  
50  
51  
52  
53  
54  
55  
56  
57  
58  
59  
60

For peer review only

## References

1. Murray CJ, Richards MA, Newton JN, et al. UK health performance: findings of the Global Burden of Disease Study 2010. *Lancet* 2013;**381**(9871):997-1020 doi: 10.1016/S0140-6736(13)60355-4[published Online First: Epub Date]].
2. H. D. The Musculoskeletal Services Framework Y1. Secondary The Musculoskeletal Services Framework Y1 2006. [http://webarchive.nationalarchives.gov.uk/20130107105354/http://www.dh.gov.uk/prod\\_consum\\_dh/groups/dh\\_digitalassets/@dh/@en/documents/digitalasset/dh\\_4138412.pdf](http://webarchive.nationalarchives.gov.uk/20130107105354/http://www.dh.gov.uk/prod_consum_dh/groups/dh_digitalassets/@dh/@en/documents/digitalasset/dh_4138412.pdf).
3. Centre HSCI. Adult psychiatric morbidity in England, 2007: Results of a household survey. In: Sally McManus HM, Traolach Brugha, Paul Bebbington, Rachel Jenkins, ed., 2009.
4. Halliwell E, Main L, Richardson C. The Fundamental Facts. Secondary The Fundamental Facts 2007. [http://www.mentalhealth.org.uk/content/assets/PDF/publications/fundamental\\_facts\\_2007.pdf?view=Standard](http://www.mentalhealth.org.uk/content/assets/PDF/publications/fundamental_facts_2007.pdf?view=Standard).
5. World Health Organization. Chronic diseases and health promotion: chronic rheumatic conditions. Secondary Chronic diseases and health promotion: chronic rheumatic conditions 2013. <http://www.who.int/chp/topics/rheumatic/en/>.
6. Health and Safety Executive. Annual Statistics Report 2011-12. Secondary Annual Statistics Report 2011-12 2012. <http://www.hse.gov.uk/statistics/overall/hssh1112.pdf>.
7. HM Government. No Health Without Mental Health: A cross-government mental health outcomes strategy for people of all ages. Secondary No Health Without Mental Health: A cross-government mental health outcomes strategy for people of all ages 2011. [https://www.gov.uk/government/uploads/system/uploads/attachment\\_data/file/213761/dh\\_124058.pdf](https://www.gov.uk/government/uploads/system/uploads/attachment_data/file/213761/dh_124058.pdf).
8. Dionne CE, Dunn KM, Croft PR. Does back pain prevalence really decrease with increasing age? A systematic review. *Age Ageing* 2006;**35**(3):229-34 doi: 10.1093/ageing/afj055[published Online First: Epub Date]].
9. Jeffries LJ, Milanese SF, Grimmer-Somers KA. Epidemiology of adolescent spinal pain: a systematic overview of the research literature. *Spine* 2007;**32**(23):2630-7 doi: 10.1097/BRS.0b013e318158d70b[published Online First: Epub Date]].
10. Hoy D, Bain C, Williams G, et al. A systematic review of the global prevalence of low back pain. *Arthritis Rheum* 2012;**64**(6):2028-37 doi: 10.1002/art.34347[published Online First: Epub Date]].
11. Maniadakis N, Gray A. The economic burden of back pain in the UK. *Pain* 2000;**84**(1):95-103
12. National Institute for Health and Clinical Excellence. Low back pain final scope. Secondary Low back pain final scope 2007. <https://www.nice.org.uk/guidance/cg88/documents/low-back-pain-final-scope2>.
13. Arthritis Research UK. Osteoarthritis in general practice. Secondary Osteoarthritis in general practice 2013. [http://www.arthritisresearchuk.org/~media/Files/Policy%20files/Policy%20pages%20files/Keele\\_Data\\_Report\\_digital\\_output.ashx?la=en](http://www.arthritisresearchuk.org/~media/Files/Policy%20files/Policy%20pages%20files/Keele_Data_Report_digital_output.ashx?la=en).
14. Oxford Economics. The economic costs of arthritis for the UK economy. Secondary The economic costs of arthritis for the UK economy 2010. <http://www.oxfordeconomics.com/my-oxford/projects/128882>.
15. Centre HSCI. Health Survey for England 2014: Health, social care and lifestyles - Summary of key findings. Secondary Health Survey for England 2014: Health, social care and lifestyles - Summary of key findings 2014. <http://www.hscic.gov.uk/catalogue/PUB19295/HSE2014-Sum-bklet.pdf>.
16. Ohayon MM. Epidemiology of insomnia: what we know and what we still need to learn. *Sleep Med Rev* 2002;**6**(2):97-111

17. Salisbury C, Johnson L, Purdy S, Valderas JM, Montgomery AA. Epidemiology and impact of multimorbidity in primary care: a retrospective cohort study. *Br J Gen Pract* 2011;**61**(582):e12-21 doi: 10.3399/bjgp11X548929[published Online First: Epub Date]].
18. Violan C, Foguet-Boreu Q, Flores-Mateo G, et al. Prevalence, determinants and patterns of multimorbidity in primary care: a systematic review of observational studies. *PLoS One* 2014;**9**(7):e102149 doi: 10.1371/journal.pone.0102149[published Online First: Epub Date]].
19. Mercer S, Salisbury C, Fortin M. *ABC of Multimorbidity*: John Wiley & Sons, 2014.
20. Barnett K, Mercer SW, Norbury M, Watt G, Wyke S, Guthrie B. Epidemiology of multimorbidity and implications for health care, research, and medical education: a cross-sectional study. *Lancet* 2012;**380**(9836):37-43 doi: 10.1016/S0140-6736(12)60240-2[published Online First: Epub Date]].
21. Katona C, Peveler R, Dowrick C, et al. Pain symptoms in depression: definition and clinical significance. *Clin Med (Lond)* 2005;**5**(4):390-5
22. Fisher P. Connecting with the Strategic Agenda: integrated medicine, polypharmacy, antimicrobial resistance and multimorbidity *CAMSTRAND 2015;CAMSTRAND*
23. The House of Lords. What is Complementary and Alternative Medicine? Growing Use of CAM in the United Kingdom Science and Technology - Sixth Report 2000
24. Eardley S, Bishop FL, Prescott P, et al. A systematic literature review of complementary and alternative medicine prevalence in EU. *Forsch Komplementmed* 2012;**19 Suppl 2**:18-28 doi: 10.1159/000342708[published Online First: Epub Date]].
25. Hunt KJ, Coelho HF, Wider B, et al. Complementary and alternative medicine use in England: results from a national survey. *Int J Clin Pract* 2010;**64**(11):1496-502 doi: 10.1111/j.1742-1241.2010.02484.x[published Online First: Epub Date]].
26. Wye L, Shaw A, Sharp D. Designing a 'NHS friendly' complementary therapy service: A qualitative case study. *BMC Health Serv Res* 2008;**8**(1):173
27. Fisher P, van Haselen R, Hardy K, Berkovitz S, McCarney R. Effectiveness gaps: a new concept for evaluating health service and research needs applied to complementary and alternative medicine. *J Altern Complement Med* 2004;**10**(4):627-32 doi: 10.1089/acm.2004.10.627[published Online First: Epub Date]].
28. Unwin J, Peters D. Gatekeepers and the Gateway--a mixed-methods inquiry into practitioners' referral behaviour to the Gateway Clinic. *Acupuncture in medicine : journal of the British Medical Acupuncture Society* 2009;**27**(1):21-5 doi: 10.1136/aim.2008.000083[published Online First: Epub Date]].
29. Kessler RC, Soukup J, Davis RB, et al. The use of complementary and alternative therapies to treat anxiety and depression in the United States. *American Journal of Psychiatry* 2001;**158**(2):289-94 doi: 10.1176/appi.ajp.158.2.289[published Online First: Epub Date]].
30. Mamtani R, Cimino A. A Primer of Complementary and Alternative Medicine and Its Relevance in the Treatment of Mental Health Problems. *Psychiatr Q* 2002;**73**(4):367-81 doi: 10.1023/A:1020472218839[published Online First: Epub Date]].
31. Eardley S, Bishop FL, Prescott P, et al. A Systematic Literature Review of Complementary and Alternative Medicine Prevalence in EU. *Forschende Komplementärmedizin / Research in Complementary Medicine* 2012;**19(suppl 2)**(Suppl. 2):18-28
32. Artus M, Croft M, Lewis M. The use of CAM and conventional treatments among primary care consultants with chronic musculoskeletal pain. *BMC Family Practice* 2007;**8**:26 doi: 10.1186/1471-2296-8-26[published Online First: Epub Date]].
33. Arksey H, O'Malley L. Scoping studies: towards a methodological framework. *International Journal of Social Research Methodology* 2005;**8**(1):19-32 doi: 10.1080/1364557032000119616[published Online First: Epub Date]].
34. Mays N, Roberts E, Popay E. Chapter 12: Synthesising research evidence In: *Methods for studying the delivery and organisation of health services*. London : Routledge 2001:188-220

- 1  
2  
3 35. Levac D, Colquhoun H, O'Brien KK. Scoping studies: advancing the methodology. *Implementation science* : IS 2010;**5**:69 doi: 10.1186/1748-5908-5-69[published Online First: Epub Date]].
- 4 36. Daudt HM, van Mossel C, Scott S. Enhancing the scoping study methodology: a large, inter-  
5 professional team's experience with Arksey and O'Malley's framework. *BMC Medical  
6 Research Methodology* 2013;**13**(1):48
- 7 37. Colquhoun HL, Levac D, O'Brien KK, et al. Scoping reviews: time for clarity in definition, methods,  
8 and reporting. *J Clin Epidemiol* 2014;**67**(12):1291-4 doi:  
9 10.1016/j.jclinepi.2014.03.013[published Online First: Epub Date]].
- 10 38. Pham MT, Rajić A, Greig JD, Sargeant JM, Papadopoulos A, McEwen SA. A scoping review of  
11 scoping reviews: advancing the approach and enhancing the consistency. *Research Synthesis  
12 Methods* 2014;**5**(4):371-85 doi: 10.1002/jrsm.1123[published Online First: Epub Date]].
- 13 39. Shea BJ, Hamel C, Wells GA, et al. AMSTAR is a reliable and valid measurement tool to assess the  
14 methodological quality of systematic reviews. *Journal of Clinical Epidemiology*  
15 2009;**62**(10):1013-20 doi: <http://dx.doi.org/10.1016/j.jclinepi.2008.10.009>[published  
16 Online First: Epub Date]].
- 17 40. Moher D, Liberati A, Tetzlaff J, Altman DG. Preferred reporting items for systematic reviews and  
18 meta-analyses: the PRISMA statement. *BMJ* 2009;**339**:b2535
- 19 41. Furlan A, Yazdi F, Tsertsvadze A, et al. Complementary and alternative therapies for back pain II.  
20 Evidence report/technology assessment 2010(194):1-764
- 21 42. Rubinstein S, Van MM, Kuijpers T, et al. A systematic review on the effectiveness of  
22 complementary and alternative medicine for chronic non-specific low-back pain. *European  
23 Spine Journal* 2010;**19**(8):1213-28.
- 24 43. Dagenais S, Gay RE, Tricco AC, Freeman MD, Mayer JM. NASS Contemporary Concepts in Spine  
25 Care: spinal manipulation therapy for acute low back pain. *Spine Journal: Official Journal of  
26 the North American Spine Society* 2010;**10**(10):918-40
- 27 44. Rubinstein SM, van Middelkoop M, Assendelft WJ, de Boer MR, van Tulder MW. Spinal  
28 manipulative therapy for chronic low-back pain: an update of a Cochrane review. *Spine*  
29 2011;**36**(13):E825-46
- 30 45. Rubinstein Sidney M, Terwee Caroline B, Assendelft Willem JJ, de Boer Michiel R, van Tulder  
31 Maurits W. Spinal manipulative therapy for acute low-back pain. *Cochrane Database of  
32 Systematic Reviews* 2012; (9).  
33 <http://onlinelibrary.wiley.com/doi/10.1002/14651858.CD008880.pub2/abstract>  
34 <http://onlinelibrary.wiley.com/store/10.1002/14651858.CD008880.pub2/asset/CD008880.pdf?v=1&t=ib3gswom&s=eb7eca6d9e95c55fc4a56961d5c3271ba098cc42>.
- 35 46. Merepeza A. Effects of spinal manipulation versus therapeutic exercise on adults with chronic  
36 low back pain: a literature review. *Journal of the Canadian Chiropractic Association*  
37 2014;**58**(4):456-66
- 38 47. Hidalgo B, Detrembleur C, Hall T, Mahaudens P, Nielens H. The efficacy of manual therapy and  
39 exercise for different stages of non-specific low back pain: an update of systematic reviews.  
40 *Journal of Manual & Manipulative Therapy (Maney Publishing)* 2014;**22**(2):59-74 doi:  
41 10.1179/2042618613Y.0000000041[published Online First: Epub Date]].
- 42 48. Tsertsvadze A, Clar C, Court R, Clarke A, Mistry H, Sutcliffe P. COST-EFFECTIVENESS OF MANUAL  
43 THERAPY FOR THE MANAGEMENT OF MUSCULOSKELETAL CONDITIONS: A SYSTEMATIC  
44 REVIEW AND NARRATIVE SYNTHESIS OF EVIDENCE FROM RANDOMIZED CONTROLLED  
45 TRIALS. *Journal of Manipulative & Physiological Therapeutics* 2014;**37**(6):343-62 doi:  
46 10.1016/j.jmpt.2014.05.001[published Online First: Epub Date]].
- 47 49. Franke H, Fryer G, Ostelo RW, Kamper SJ. Muscle energy technique for non-specific low-back  
48 pain. *Cochrane Database Syst Rev* 2015;**2**:CD009852 doi:  
49 10.1002/14651858.CD009852.pub2[published Online First: Epub Date]].
- 50  
51  
52  
53  
54  
55  
56  
57  
58  
59  
60

- 1  
2  
3 50. Manheimer E, White A, Berman B, Forys K, Ernst E. Meta-analysis: acupuncture for low back pain  
4 [corrected] [published erratum appears in ANN INTERN MED 2005 Jun 7;142(11):950-1; ANN  
5 INTERN MED 2005;143(9):695]. *Annals of Internal Medicine* 2005;**142**(8):651
- 6 51. Xu M, Yan S, Yin X, et al. Acupuncture for chronic low back pain in long-term follow-up: a meta-  
7 analysis of 13 randomized controlled trials. *American Journal of Chinese Medicine*  
8 2013;**41**(1):1-19
- 9 52. Holtzman S, Beggs R. Yoga for chronic low back pain: A meta-analysis of randomized controlled  
10 trials. *Pain Research & Management* 2013;**18**(5):267-72
- 11 53. Pittler MH, Karagülle MZ, Karagülle M, Ernst E. Spa therapy and balneotherapy for treating low  
12 back pain: meta-analysis of randomized trials. *Rheumatology (Oxford, England)*  
13 2006;**45**(7):880-4 doi: 10.1093/rheumatology/kei018[published Online First: Epub Date]].
- 14 54. Furlan AD, van Tulder M, Cherkin D, et al. Acupuncture and dry-needling for low back pain: an  
15 updated systematic review within the framework of the cochrane collaboration. *Spine*  
16 2005;**30**(8):944-63
- 17 55. Yuan QL, Guo TM, Liu L, Sun F, Zhang YG. Traditional Chinese Medicine for Neck Pain and Low  
18 Back Pain: A Systematic Review and Meta-Analysis. *PloS one* 2015;**10**(2):e0117146 doi:  
19 10.1371/journal.pone.0117146[published Online First: Epub Date]].
- 20 56. Posadzki P, Lizis P, Hagner-Derengowska M. Pilates for low back pain: a systematic review.  
21 *Complementary Therapies in Clinical Practice* 2011;**17**(2):85-9
- 22 57. Lim EC, Poh RL, Low AY, Wong WP. Effects of Pilates-based exercises on pain and disability in  
23 individuals with persistent nonspecific low back pain: a systematic review with meta-  
24 analysis. *Journal of Orthopaedic & Sports Physical Therapy* 2011;**41**(2):70-80
- 25 58. Miyamoto GC, Costa LO, Cabral CM. Efficacy of the Pilates method for pain and disability in  
26 patients with chronic nonspecific low back pain: a systematic review with meta-analysis.  
27 *Brazilian Journal of Physical Therapy* 2013;**17**(6):517-32
- 28 59. Aladro-Gonzalvo AR, Araya-Vargas GA, Machado-Diaz M, Salazar-Rojas W. Pilates-based exercise  
29 for persistent, non-specific low back pain and associated functional disability: a meta-  
30 analysis with meta-regression. *Journal of Bodywork & Movement Therapies* 2013;**17**(1):125-  
31 36
- 32 60. Yamato TMC SBHMORCCMCLCL. Pilates for low back pain. *Cochrane Database of Systematic*  
33 *Reviews* 2015(7):No.: CD010265. DOI: 10.1002/14651858.CD010265.pub2
- 34 61. Posadzki P, Ernst E. Yoga for low back pain: a systematic review of randomized clinical trials.  
35 *Clinical Rheumatology* 2011;**30**(9):1257-62
- 36 62. Ward L, Stebbings S, Cherkin D, Baxter GD. Yoga for functional ability, pain and psychosocial  
37 outcomes in musculoskeletal conditions: a systematic review and meta-analysis.  
38 *Musculoskeletal Care* 2013;**11**(4):203-17
- 39 63. Cramer H, Lauche R, Haller H, Dobos G. A systematic review and meta-analysis of yoga for low  
40 back pain. *Clinical Journal of Pain* 2013;**29**(5):450-60
- 41 64. Furlan Andrea D, Giraldo M, Baskwill A, Imamura M. Massage for low-back pain. *Cochrane*  
42 *Database of Systematic Reviews* 2015(9):Art. No.: CD001929. DOI:  
43 10.1002/14651858.CD001929.pub3.
- 44 65. Orrock PJ, Myers SP. Osteopathic intervention in chronic non-specific low back pain: a systematic  
45 review. *BMC Musculoskeletal Disorders* 2013;**14**:129
- 46 66. Franke H, Franke JD, Fryer G. Osteopathic manipulative treatment for nonspecific low back pain:  
47 a systematic review and meta-analysis. *BMC Musculoskeletal Disorders* 2014;**15**:286
- 48 67. Kim YC, Lee MS, Park ES, Lew JH, Lee BJ. Acupressure for the treatment of musculoskeletal pain  
49 conditions: A systematic review. *Journal of Musculoskeletal Pain* 2012;**20**(2):116-21
- 50 68. Hu X-yC, Ni-ni; Chai,Qian-yun; Yang, Guo-yan; Trevelyan, Esme; Lorenc, Ava; Liu, Jian-ping;  
51 Robinson, Nicola. Integrative Treatment for Low Back Pain: An Exploratory Systematic  
52 Review and Meta-Analysis of Randomized Controlled Trials. *Chin J Integr Med*  
53 2015;**Accepted for publication**
- 54  
55  
56  
57  
58  
59  
60



- 1  
2  
3 69. Kizhakkeveettil A, Rose K, Kadar GE. Integrative therapies for low back pain that include  
4 complementary and alternative medicine care: A systematic review. *Global Advances In*  
5 *Health and Medicine* 2014;**3**(5):49-64
- 6 70. Walker BF, French SD, Grant W, Green S. Combined chiropractic interventions for low-back pain.  
7 *Cochrane Database of Systematic Reviews* 2010:N.PAG
- 8 71. Langhorst J, Klose P, Musial F, Irnich D, Hauser W. Efficacy of acupuncture in fibromyalgia  
9 syndrome--a systematic review with a meta-analysis of controlled clinical trials.  
10 *Rheumatology* 2010;**49**(4):778-88
- 11 72. Cao H, Liu J, Lewith G. Traditional Chinese Medicine for treatment of fibromyalgia: a systematic  
12 review of randomized controlled trials. *Journal of Alternative & Complementary Medicine -*  
13 *New York* 2010;**16**(4):397-409.
- 14 73. Deare JC, Zheng Z, Xue CC, et al. Acupuncture for treating fibromyalgia. *Cochrane Database of*  
15 *Systematic Reviews* 2013;**5**:CD007070
- 16 74. Cao H, Li X, Han M, Liu J. Acupoint stimulation for fibromyalgia: A systematic review of  
17 randomized controlled trials. *Evidence-based Complementary and Alternative Medicine*  
18 2013;**2013**(362831)
- 19 75. Bai Y, Guo Y, Wang H, et al. Efficacy of acupuncture on fibromyalgia syndrome: A Meta-analysis.  
20 *Journal of Traditional Chinese Medicine* 2014;**34**(4):381-91
- 21 76. Porter N, Jason L, Boulton A, Bothne N, Coleman B. Alternative medical interventions used in the  
22 treatment and management of myalgic encephalomyelitis/chronic fatigue syndrome and  
23 fibromyalgia. *Journal of Alternative & Complementary Medicine - New York* 2010;**16**(3):235-  
24 49.
- 25 77. Li YH, Wang FY, Feng CQ, Yang XF, Sun YH. Massage therapy for fibromyalgia: a systematic review  
26 and meta-analysis of randomized controlled trials. *PLoS ONE [Electronic Resource]*  
27 2014;**9**(2):e89304
- 28 78. Yuan SLK, Matsutani LA, Marques AP. Effectiveness of different styles of massage therapy in  
29 fibromyalgia: A systematic review and meta-analysis. *Manual Therapy* 2015;**20**(2):257-64  
30 doi: 10.1016/j.math.2014.09.003[published Online First: Epub Date]].
- 31 79. Lauche R, Cramer H, Dobos G, Langhorst J, Schmidt S. A systematic review and meta-analysis of  
32 mindfulness-based stress reduction for the fibromyalgia syndrome. *Journal of Psychosomatic*  
33 *Research* 2013;**75**(6):500-10
- 34 80. Theadom A, Cropley M, Smith HE, Feigin VL, McPherson K. Mind and body therapy for  
35 fibromyalgia. *The Cochrane database of systematic reviews* 2015;**4**:Cd001980 doi:  
36 10.1002/14651858.CD001980.pub3[published Online First: Epub Date]].
- 37 81. Bernardy K, Fuber N, Klose P, Hauser W. Efficacy of hypnosis/guided imagery in fibromyalgia  
38 syndrome--a systematic review and meta-analysis of controlled trials. *BMC Musculoskeletal*  
39 *Disorders* 2011;**12**:133
- 40 82. Mist SD, Firestone KA, Jones KD. Complementary and alternative exercise for fibromyalgia: a  
41 meta-analysis. *Journal of pain research* 2013;**6**:247-60 doi: 10.2147/JPR.S32297[published  
42 Online First: Epub Date]].
- 43 83. Gross A, Langevin P, Burnie SJ, et al. Manipulation and mobilisation for neck pain contrasted  
44 against an inactive control or another active treatment. *Cochrane Database of Systematic*  
45 *Reviews* 2015(9) doi: 10.1002/14651858.CD004249.pub4[published Online First: Epub  
46 Date]].
- 47 84. Carlesso LC, Gross AR, Santaguida PL, Burnie S, Voth S, Sadi J. Adverse events associated with the  
48 use of cervical manipulation and mobilization for the treatment of neck pain in adults: a  
49 systematic review. *Manual Therapy* 2010;**15**(5):434-44
- 50 85. Lin JH, Chiu TT, Hu J. Chinese manipulation for mechanical neck pain: a systematic review. *Clinical*  
51 *Rehabilitation* 2012;**26**(11):963-73
- 52 86. Huisman PA, Speksnijder CM, de Wijer A. The effect of thoracic spine manipulation on pain and  
53 disability in patients with non-specific neck pain: a systematic review. *Disability &*  
54  
55  
56  
57  
58  
59

- 1  
2  
3 Rehabilitation 2013;**35**(20):1677-85 doi: 10.3109/09638288.2012.750689[published Online  
4 First: Epub Date]].
- 5 87. Boyles R, Toy P, Mellon Jr J, Hayes M, Hammer B. Effectiveness of manual physical therapy in the  
6 treatment of cervical radiculopathy: A systematic review. *Journal of Manual and*  
7 *Manipulative Therapy* 2011;**19**(3):135-42
- 8 88. Miller J, Gross A, D'Sylva J, et al. Manual therapy and exercise for neck pain: a systematic review.  
9 *Manual Therapy* 2010;**15**(4):334-54
- 10 89. D'Sylva J, Miller J, Gross A, et al. Manual therapy with or without physical medicine modalities for  
11 neck pain: a systematic review. *Manual Therapy* 2010;**15**(5):415-33 doi:  
12 10.1016/j.math.2010.04.003[published Online First: Epub Date]].
- 13 90. Trinh K, Graham N, Gross A, et al. Acupuncture for neck disorders. *Cochrane Database of*  
14 *Systematic Reviews* 2006:N.PAG
- 15 91. Patel KC, Gross A, Graham N, et al. Massage for mechanical neck disorders. *Cochrane Database*  
16 *of Systematic Reviews* 2012;**9**:CD004871
- 17 92. White A, Foster NE, Cummings M, Barlas P. Acupuncture treatment for chronic knee pain: a  
18 systematic review. *Rheumatology* 2007;**46**(3):384-90
- 19 93. Manheimer E, Cheng K, Linde K, et al. Acupuncture for peripheral joint osteoarthritis. *Cochrane*  
20 *Database of Systematic Reviews* 2010(1):CD001977
- 21 94. Cao L, Zhang XL, Gao YS, Jiang Y. Needle acupuncture for osteoarthritis of the knee. A systematic  
22 review and updated meta-analysis. *Saudi Medical Journal* 2012;**33**(5):526-32
- 23 95. Corbett M, Rice S, Madurasinghe V, et al. Acupuncture and other physical treatments for the  
24 relief of pain due to osteoarthritis of the knee: Network meta-analysis. *Osteoarthritis and*  
25 *Cartilage* 2013;**21**(9):1290-8.
- 26 96. Turner K, Igo S. Efficacy of acupuncture in the treatment of osteoarthritis of the knee joint.  
27 *Journal - Acupuncture Association of Chartered Physiotherapists* 2013;**2013**(1):21-39.
- 28 97. Manyanga T, Froese M, Zarychanski R, et al. Pain management with acupuncture in  
29 osteoarthritis: a systematic review and meta-analysis. *BMC Complementary & Alternative*  
30 *Medicine* 2014;**14**:312
- 31 98. Hall A, Maher C, Latimer J, Ferreira M. The effectiveness of Tai Chi for chronic musculoskeletal  
32 pain conditions: a systematic review and meta-analysis. *Arthritis & Rheumatism*  
33 2009;**61**(6):717-24
- 34 99. Kang JW, Lee MS, Posadzki P, Ernst E. T'ai chi for the treatment of osteoarthritis: a systematic  
35 review and meta-analysis. *BMJ Open* 2011;**1**(1) doi: 10.1136/bmjopen-2010-  
36 000035[published Online First: Epub Date]].
- 37 100. Lauche R, Langhorst J, Dobos G, Cramer H. A systematic review and meta-analysis of Tai Chi for  
38 osteoarthritis of the knee. *Complementary Therapies in Medicine* 2013;**21**(4):396-406
- 39 101. Yan JH, Gu WJ, Sun J, Zhang WX, Li BW, Pan L. Efficacy of Tai Chi on pain, stiffness and function  
40 in patients with osteoarthritis: a meta-analysis. *PLoS ONE [Electronic Resource]*  
41 2013;**8**(4):e61672
- 42 102. Mat S, Tan MP, Kamaruzzaman SB, Ng CT. Physical therapies for improving balance and  
43 reducing falls risk in osteoarthritis of the knee: a systematic review. *Age Ageing*  
44 2015;**44**(1):16-24 doi: 10.1093/ageing/afu112[published Online First: Epub Date]].
- 45 103. Casimiro L, Barnsley L, Brosseau L, et al. Acupuncture and electroacupuncture for the treatment  
46 of rheumatoid arthritis. *Cochrane Database of Systematic Reviews* 2005(4):CD003788
- 47 104. Lee M, Shin B, Ernst E. Acupuncture for rheumatoid arthritis: a systematic review.  
48 *Rheumatology* 2008;**47**(12):1747-53.
- 49 105. Sun ZL, Xu X, Du SZ, Jiang X. Moxibustion for treating rheumatoid arthritis: A systematic review  
50 and meta-analysis of randomized controlled trials. *European Journal of Integrative Medicine*  
51 2014;**6**(6):621-30
- 52  
53  
54  
55  
56  
57  
58  
59  
60



106. Verhagen AP, Bierma-Zeinstra SM, Boers M, et al. Balneotherapy (or spa therapy) for rheumatoid arthritis. The Cochrane database of systematic reviews 2015;**4**:CD000518 doi: 10.1002/14651858.CD000518.pub2[published Online First: Epub Date]].
107. Law D, McDonough S, Bleakley C, Baxter GD, Tumilty S. Laser Acupuncture for Treating Musculoskeletal Pain: A Systematic Review with Meta-analysis. JAMS Journal of Acupuncture and Meridian Studies 2015;**8**(1):2-16
108. Zhao H-J, Tan J-Y, Wang T, Jin L. Auricular therapy for chronic pain management in adults: A synthesis of evidence. Complementary Therapies in Clinical Practice 2015;**21**(2):68-78 doi: 10.1016/j.ctcp.2015.03.006[published Online First: Epub Date]].
109. Wong Lit Wan D, Wang Y, Xue CC, Wang LP, Liang FR, Zheng Z. Local and distant acupuncture points stimulation for chronic musculoskeletal pain: A systematic review on the comparative effects. Eur J Pain 2015;**19**(9):1232-47 doi: 10.1002/ejp.671[published Online First: Epub Date]].
110. Song Y, Lu H, Chen H, Geng G, Wang J. Mindfulness intervention in the management of chronic pain and psychological comorbidity: A meta-analysis. International Journal of Nursing Sciences 2014;**1**(2):215-23
111. Bawa FL, Mercer SW, Atherton RJ, et al. Does mindfulness improve outcomes in patients with chronic pain? Systematic review and meta-analysis. The British journal of general practice : the journal of the Royal College of General Practitioners 2015;**65**(635):e387-400 doi: 10.3399/bjgp15X685297[published Online First: Epub Date]].
112. Braun C, Hanchard NCA. Manual therapy and exercise for impingement-related shoulder pain. Physical Therapy Reviews 2010;**15**(2):62-83 doi: 10.1179/174328810X12786297204675[published Online First: Epub Date]].
113. Page Matthew J, Green S, Kramer S, et al. Manual therapy and exercise for adhesive capsulitis (frozen shoulder). Cochrane Database of Systematic Reviews 2014(8):CD011275 doi: 10.1002/14651858.CD011275[published Online First: Epub Date]].
114. Clar C, Tsertsvadze A, Court R, Hundt GL, Clarke A, Sutcliffe P. Clinical effectiveness of manual therapy for the management of musculoskeletal and non-musculoskeletal conditions: Systematic review and update of UK evidence report. Chiropractic and Manual Therapies 2014;**22**:12
115. Desjardins-Charbonneau A, Roy JS, Dionne CE, Fremont P, MacDermid JC, Desmeules F. The efficacy of manual therapy for rotator cuff tendinopathy: a systematic review and meta-analysis. J Orthop Sports Phys Ther 2015;**45**(5):330-50 doi: 10.2519/jospt.2015.5455[published Online First: Epub Date]].
116. Green S, Buchbinder R, Hetrick S. Acupuncture for shoulder pain. Cochrane Database of Systematic Reviews 2005(2):CD005319
117. Tough EA, White AR, Cummings T, Richards SH, Campbell JL. Acupuncture and dry needling in the management of myofascial trigger point pain: A systematic review and meta-analysis of randomised controlled trials. European Journal of Pain 2009;**13**(1):3-10
118. Liu L, Huang QM, Liu QG, et al. Effectiveness of dry needling for myofascial trigger points associated with neck and shoulder pain: A systematic review and meta-analysis. Archives of Physical Medicine and Rehabilitation 2015;**96**(5):944-55
119. Clark RJ, Tighe M. The effectiveness of acupuncture for plantar heel pain: a systematic review. Acupuncture in Medicine 2012;**30**(4):298-306
120. Qin ZL, Xiaoxu; Wu, Jiani; Zhai, Yanbing; Liu, Zhishun. Acupuncture for sciatica: a systematic review. 2015
121. Bisset L, Hing W, Vicenzino B. A systematic review of the efficacy of MWM. In: Bill Vicenzino WH, Darren Rivett, Toby Hall, ed. Mobilisation with Movement: The Art and Science. Australia: Elsevier 2011:26-63.

- 1  
2  
3 122. Tang H, Fan H, Chen J, et al. Acupuncture for Lateral Epicondylitis: A Systematic Review. *Evid*  
4 *Based Complement Alternat Med* 2015;**2015**:861849 doi: 10.1155/2015/861849[published  
5 Online First: Epub Date]].
- 6 123. Southerst D, Marchand AA, Cote P, et al. The effectiveness of noninvasive interventions for  
7 musculoskeletal thoracic spine and chest wall pain: a systematic review by the Ontario  
8 Protocol for Traffic Injury Management (OPTIMa) collaboration. *J Manipulative Physiol Ther*  
9 2015;**38**(7):521-31 doi: 10.1016/j.jmpt.2015.06.001[published Online First: Epub Date]].
- 10 124. Piper S, Shearer HM, Cote P, et al. The effectiveness of soft-tissue therapy for the management  
11 of musculoskeletal disorders and injuries of the upper and lower extremities: A systematic  
12 review by the Ontario Protocol for Traffic Injury management (OPTIMa) collaboration. *Man*  
13 *Ther* 2016;**21**:18-34 doi: 10.1016/j.math.2015.08.011[published Online First: Epub Date]].
- 14 125. de Vibe M, Bjørndal Arlid, Tipton Elizabeth, Hammerstrøm K, Kowalski K. Mindfulness Based  
15 Stress Reduction (MBSR) for Improving Health, Quality of Life, and Social Functioning in  
16 Adults, 2012.
- 17 126. Goyal M, Singh S, Sibinga EM, et al. Meditation programs for psychological stress and well-  
18 being: a systematic review and meta-analysis. *JAMA Internal Medicine* 2014;**174**(3):357-68
- 19 127. Smith CA, Hay PP, Macpherson H. Acupuncture for depression. *Cochrane Database of*  
20 *Systematic Reviews* 2010(1):CD004046
- 21 128. Zhang ZJ, Chen HY, Yip KC, Ng R, Wong VT. The effectiveness and safety of acupuncture therapy  
22 in depressive disorders: systematic review and meta-analysis. *Journal of Affective Disorders*  
23 2010;**124**(1-2):9-21
- 24 129. Wang H, Qi H, Wang BS, et al. Is acupuncture beneficial in depression: a meta-analysis of 8  
25 randomized controlled trials? *Journal of Affective Disorders* 2008;**111**(2-3):125-34
- 26 130. Klainin-Yobas P, Oo WN, Suzanne Yew PY, Lau Y. Effects of relaxation interventions on  
27 depression and anxiety among older adults: a systematic review. *Aging & mental health*  
28 2015:1-13 doi: 10.1080/13607863.2014.997191[published Online First: Epub Date]].
- 29 131. Cramer H, Lauche R, Langhorst J, Dobos G. Yoga for depression: a systematic review and meta-  
30 analysis. *Depression & Anxiety* 2013;**30**(11):1068-83
- 31 132. Maratos A, Gold C, Wang X, Crawford M. Music therapy for depression. *Cochrane database of*  
32 *systematic reviews (Online)* 2008(1):CD004517 doi:  
33 10.1002/14651858.CD004517.pub2[published Online First: Epub Date]].
- 34 133. Liu X, Clark J, Siskind D, et al. A systematic review and meta-analysis of the effects of Qigong  
35 and Tai Chi for depressive symptoms. *Complement Ther Med* 2015;**23**(4):516-34 doi:  
36 10.1016/j.ctim.2015.05.001[published Online First: Epub Date]].
- 37 134. Joyce J, Herbison GP. Reiki for depression and anxiety. *Cochrane Database of Systematic*  
38 *Reviews* 2015; (4).  
39 <http://onlinelibrary.wiley.com/doi/10.1002/14651858.CD006833.pub2/abstracthttp://onlinelibrary.wiley.com/store/10.1002/14651858.CD006833.pub2/asset/CD006833.pdf?v=1&t=ib3g7f71&s=fc7f57607f3f9ab6e5f4c9efedb82890cbf11111>.
- 40 135. Chi I, Jordan-Marsh M, Guo M, Xie B, Bai Z. Tai chi and reduction of depressive symptoms for  
41 older adults: a meta-analysis of randomized trials. *Geriatrics & gerontology international*  
42 2013;**13**(1):3-12
- 43 136. Kirkwood G, Rampes H, Tuffrey V, Richardson J, Pilkington K. Yoga for anxiety: a systematic  
44 review of the research evidence... including commentary by Ramaratnam S. *British journal of*  
45 *sports medicine* 2005;**39**(12):884-91; discussion 91 doi:  
46 10.1136/bjism.2005.018069[published Online First: Epub Date]].
- 47 137. Chugh-Gupta N, Baldassarre F, Vrkljan B. A systematic review of yoga for state anxiety:  
48 Considerations for occupational therapy. *Canadian Journal of Occupational Therapy*  
49 2013;**80**(3):150-70.
- 50 138. Krisanaprakornkit T, Krisanaprakornkit W, Piyavhatkul N, Laopaiboon M. Meditation therapy for  
51 anxiety disorders. *Cochrane Database of Systematic Reviews* 2006(1):CD004998
- 52  
53  
54  
55  
56  
57  
58  
59  
60

- 1  
2  
3 139. Chen KW, Berger CC, Manheimer E, et al. Meditative therapies for reducing anxiety: A  
4 systematic review and meta-analysis of randomized controlled trials. *Depression and Anxiety*  
5 2012;**29**(7):545-62
- 6 140. Pilkington K, Kirkwood G, Rampes H, Cummings M, Richardson J. Acupuncture for anxiety and  
7 anxiety disorders--a systematic literature review. *Acupuncture in Medicine* 2007;**25**(1-2):1-  
8 10
- 9 141. Wang CW, Chan CH, Ho RT, Chan JS, Ng SM, Chan CL. Managing stress and anxiety through  
10 qigong exercise in healthy adults: a systematic review and meta-analysis of randomized  
11 controlled trials. *BMC Complementary & Alternative Medicine* 2014;**14**:8
- 12 142. Wu H, Yu D, He Y, Wang J, Xiao Z, Li C. Morita therapy for anxiety disorders in adults. *Cochrane*  
13 *Database Syst Rev* 2015;**2**:CD008619 doi: 10.1002/14651858.CD008619.pub2[published  
14 Online First: Epub Date]].
- 15 143. Robinson J, Biley FC, Dolk H. Therapeutic touch for anxiety disorders. *Cochrane Database of*  
16 *Systematic Reviews* 2006;**(4)**(CD006240)
- 17 144. Wu W-w, Kwong E, Lan X-y, Jiang X-y. The Effect of a Meditative Movement Intervention on  
18 Quality of Sleep in the Elderly: A Systematic Review and Meta-Analysis. *The Journal of*  
19 *Alternative and Complementary Medicine* 2015 doi: 10.1089/acm.2014.0251[published  
20 Online First: Epub Date]].
- 21 145. Neuendorf R, Wahbeh H, #xe9, et al. The Effects of Mind-Body Interventions on Sleep Quality: A  
22 Systematic Review. *Evidence-Based Complementary and Alternative Medicine* 2015;**2015**:17  
23 doi: 10.1155/2015/902708[published Online First: Epub Date]].
- 24 146. Wang F, Eun-Kyoung Lee O, Feng F, et al. The effect of meditative movement on sleep quality: A  
25 systematic review. *Sleep Med Rev* 2015;**30**:43-52 doi: 10.1016/j.smrv.2015.12.001[published  
26 Online First: Epub Date]].
- 27 147. Huang W, Kutner N, Bliwise DL. A systematic review of the effects of acupuncture in treating  
28 insomnia. *Sleep Medicine Reviews* 2009;**13**(1):73-104
- 29 148. Lan Y, Wu X, Tan HJ, et al. Auricular acupuncture with seed or pellet attachments for primary  
30 insomnia: A systematic review and meta-analysis. *BMC Complementary and Alternative*  
31 *Medicine* 2015;**15**(1)
- 32 149. Du S, Dong J, Zhang H, et al. Taichi exercise for self-rated sleep quality in older people: A  
33 systematic review and meta-analysis. *International Journal of Nursing Studies*  
34 2015;**52**(1):368-79
- 35 150. Cooper KL, Relton C. Homeopathy for insomnia: a systematic review of research evidence. *Sleep*  
36 *Medicine Reviews* 2010;**14**(5):329-37
- 37 151. Lam TH, Chung KF, Yeung WF, Yu BY, Yung KP, Ng TH. Hypnotherapy for insomnia: a systematic  
38 review and meta-analysis of randomized controlled trials. *Complement Ther Med*  
39 2015;**23**(5):719-32 doi: 10.1016/j.ctim.2015.07.011[published Online First: Epub Date]].
- 40 152. Furlan A, Yazdi F, Tsertsvadze A, et al. Complementary and alternative therapies for back pain II.  
41 Evidence report/technology assessment 2010(194):1-764
- 42 153. Rubinstein SM, Terwee CB, Assendelft WJJ, de Boer MR, van Tulder MW. Spinal manipulative  
43 therapy for acute low-back pain. *Cochrane Database of Systematic Reviews*  
44 2012(9):CD008880 doi: 10.1002/14651858.CD008880.pub2[published Online First: Epub  
45 Date]].
- 46 154. Trinh K, Graham N, Gross A, et al. Acupuncture for neck disorders. *Cochrane Database of*  
47 *Systematic Reviews* 2006:CD004870
- 48 155. Cao H, Li X, Han M, Liu J. Acupoint stimulation for fibromyalgia: A systematic review of  
49 randomized controlled trials. *Evidence-based Complementary and Alternative Medicine*  
50 2013;**2013**(362831): doi: 10.1155/2013/362831
- 51 156. Cao H, Li X, Han M, Liu J. Acupoint stimulation for fibromyalgia: A systematic review of  
52 randomized controlled trials. *Evidence-based Complementary and Alternative Medicine*  
53 2013;**2013 (no pagination)**(362831)
- 54  
55  
56  
57  
58  
59  
60

- 1  
2  
3 157. Bisset L, Hing W, Vicenzino B. A systematic review of the efficacy of MWM. In: Bill Vicenzino  
4 WH, Darren Rivett, Toby Hall, ed. Mobilisation with Movement: The Art and Science.  
5 Australia: Elsevier 2011:26-63.
- 6 158. de Vibe M, Bjørndal Arlid, Tipton Elizabeth, Hammerstrøm K, Kowalski K. Mindfulness Based  
7 Stress Reduction (MBSR) for Improving Health, Quality of Life, and Social Functioning in  
8 Adults. *Campbell Systematic Reviews* 2012;**3**
- 9 159. Kirkwood G, Rampes H, Tuffrey V, Richardson J, Pilkington K. Yoga for anxiety: a systematic  
10 review of the research evidence. *British journal of sports medicine* 2005;**39**(12):884-91 doi:  
11 10.1136/bjism.2005.018069[published Online First: Epub Date]].
- 12 160. Wu W-w, Kwong E, Lan X-y, Jiang X-y. The Effect of a Meditative Movement Intervention on  
13 Quality of Sleep in the Elderly: A Systematic Review and Meta-Analysis. *The Journal of*  
14 *Alternative and Complementary Medicine* 2015;**21**(9):509-19 doi:  
15 10.1089/acm.2014.0251[published Online First: Epub Date]].
- 16 161. Wieland LS, Skoetz N, Pilkington K, Vempati R, D'Adamo CR, Berman BM. Yoga treatment for  
17 chronic non-specific low back pain. *Cochrane Database of Systematic Reviews*  
18 2017;**1**:CD010671
- 19 162. Klatte R, Pabst S, Beelmann A, Rosendahl J. Effectiveness of body-oriented yoga for mental  
20 disorders. *Deutsches Arzteblatt International* 2016;**113**(12):195-202
- 21 163. Cramer H, Anheyer D, Lauche R, Dobos G. A systematic review of yoga for major depressive  
22 disorder. *Journal of Affective Disorders* 2017;**213**:70-77
- 23 164. Tekur P, Nagarathna R, Chametcha S, Hankey A, Nagendra HR. A comprehensive yoga programs  
24 improves pain, anxiety and depression in chronic low back pain patients more than exercise:  
25 An RCT. *Complement Ther Med* 2012;**20**(3):107-18 doi:  
26 <http://dx.doi.org/10.1016/j.ctim.2011.12.009>[published Online First: Epub Date]].
- 27 165. Femia A, Lemaster C, Bertisch S, Saper R. Change in sleep quality in a randomized controlled  
28 trial of yoga, physical therapy, and education for low-income minorities with chronic low  
29 back pain. *Journal of Alternative and Complementary Medicine* 2016;**22** (6):A74-A75
- 30 166. Telles S, Bhardwaj AK, Gupta RK, Sharma SK, Monro R, Balkrishna A. A Randomized Controlled  
31 Trial to Assess Pain and Magnetic Resonance Imaging-Based (MRI-Based) Structural Spine  
32 Changes in Low Back Pain Patients After Yoga Practice. *Medical Science Monitor*  
33 2016;**22**:3228-47
- 34 167. Sherman KJ, Wellman RD, Cook AJ, Cherkin DC, Ceballos RM. Mediators of Yoga and Stretching  
35 for Chronic Low Back Pain. *Evidence-Based Complementary and Alternative Medicine*  
36 2013;**2013**:11 doi: 10.1155/2013/130818[published Online First: Epub Date]].
- 37 168. Hilton L, Hempel S, Ewing BA, et al. Mindfulness Meditation for Chronic Pain: Systematic Review  
38 and Meta-analysis. *Ann Behav Med* 2017;**51**(2):199-213 doi: 10.1007/s12160-016-9844-  
39 2[published Online First: Epub Date]].
- 40 169. Anheyer D, Haller H, Barth J, Lauche R, Dobos G, Cramer H. Mindfulness-Based Stress Reduction  
41 for Treating Low Back Pain: A Systematic Review and Meta-analysis. *Annals of Internal*  
42 *Medicine* 2017;**166**(11):799-807
- 43 170. Zangi HA, Mowinckel P, Finset A, et al. A mindfulness-based group intervention to reduce  
44 psychological distress and fatigue in patients with inflammatory rheumatic joint diseases: a  
45 randomised controlled trial. *Annals of the Rheumatic Diseases* 2012;**71**(6):911-17 doi:  
46 10.1136/annrheumdis-2011-200351[published Online First: Epub Date]].
- 47 171. Wong SY, Chan FW, Wong RL, et al. Comparing the effectiveness of mindfulness-based stress  
48 reduction and multidisciplinary intervention programs for chronic pain: a randomized  
49 comparative trial. *The Clinical journal of pain* 2011;**27**(8):724-34 doi:  
50 10.1097/AJP.0b013e3182183c6e[published Online First: Epub Date]].
- 51 172. Braden BB, Pipe TB, Smith R, Glaspy TK, Deatherage BR, Baxter LC. Brain and behavior changes  
52 associated with an abbreviated 4-week mindfulness-based stress reduction course in back  
53 pain patients. *Brain and Behavior* 2016;**6**(3):e00443
- 54  
55  
56  
57  
58  
59  
60

- 1  
2  
3 173. Amutio A, Franco C, de Carmen Perez-Fuentes M, Gazquez JJ, Mercader I. Mindfulness training  
4 for reducing anger, anxiety, and depression in fibromyalgia patients. *Frontiers in Psychology*  
5 Vol 5 2015, ArtID 1572 2015;5
- 6 174. Shim JW, Jung JY, Kim SS. Effects of Electroacupuncture for Knee Osteoarthritis: A Systematic  
7 Review and Meta-Analysis. *Evidence-based Complementary and Alternative Medicine*  
8 2016;2016 (no pagination)(3485875)
- 9 175. Lin X, Huang K, Zhu G, Huang Z, Qin A, Fan S. The Effects of Acupuncture on Chronic Knee Pain  
10 Due to Osteoarthritis: A Meta-Analysis. *Journal of Bone & Joint Surgery - American Volume*  
11 2016;98(18):1578-85
- 12 176. Huang KY, Liang S, Grellet A, Zhang JB. Acupuncture and moxibustion for primary insomnia: A  
13 systematic review and meta-analysis of randomized controlled trials. *Eur J Integr Med*  
14 2017;12:93-107
- 15 177. Dong B, Chen Z, Yin X, et al. The Efficacy of Acupuncture for Treating Depression-Related  
16 Insomnia Compared with a Control Group: A Systematic Review and Meta-Analysis. *BioMed*  
17 *Research International* 2017;2017:9614810
- 18 178. Shergis JL, Ni X, Jackson ML, et al. A systematic review of acupuncture for sleep quality in  
19 people with insomnia. *Complement Ther Med* 2016;26:11-20
- 20 179. Wang C, Schmid CH, Iversen MD, et al. Comparative Effectiveness of Tai Chi Versus Physical  
21 Therapy for Knee Osteoarthritis: A Randomized Trial. *Annals of Internal Medicine*  
22 2016;165(2):77-86
- 23 180. Shea BJ, Reeves BC, Wells G, et al. AMSTAR 2: a critical appraisal tool for systematic reviews  
24 that include randomised or non-randomised studies of healthcare interventions, or both.  
25 *BMJ* 2017;358 doi: 10.1136/bmj.j4008[published Online First: Epub Date]].
- 26 181. Linde K. Can you trust systematic reviews of complementary and alternative therapies? *Eur J*  
27 *Integr Med* 2009;1(3):117-23 doi: <http://dx.doi.org/10.1016/j.eujim.2009.09.002>[published  
28 Online First: Epub Date]].
- 29 182. Verhoef MJ, Lewith G, Ritenbaugh C, Boon H, Fleishman S, Leis A. Complementary and  
30 alternative medicine whole systems research: Beyond identification of inadequacies of the  
31 RCT. *Complement Ther Med* 2005;13(3):206-12
- 32 183. Carter B. Methodological issues and complementary therapies: researching intangibles?  
33 *Complementary Therapies in Nursing and Midwifery* 2003;9(3):133-39
- 34  
35  
36  
37  
38  
39  
40  
41  
42  
43  
44  
45  
46  
47  
48  
49  
50  
51  
52  
53  
54  
55  
56  
57  
58  
59  
60

1  
2  
3  
4  
5  
6  
7  
8  
9  
10  
11  
12  
13  
14  
15  
16  
17  
18  
19  
20  
21  
22  
23  
24  
25  
26  
27  
28  
29  
30  
31  
32  
33  
34  
35  
36  
37  
38  
39  
40  
41  
42  
43  
44  
45  
46  
47  
48  
49  
50  
51  
52  
53  
54  
55  
56  
57  
58  
59  
60

Appendix 1: Inclusion and exclusion criteria for review

Appendix 2: AMSTAR items reported in SRs

Figure 1: PRISMA flowchart

For peer review only

1  
2  
3  
4  
5  
6  
7  
8  
9  
10  
11  
12  
13  
14  
15  
16  
17  
18  
19  
20  
21  
22  
23  
24  
25  
26  
27  
28  
29  
30  
31  
32  
33  
34  
35  
36  
37  
38  
39  
40  
41  
42  
43  
44  
45  
46  
47  
48  
49  
50  
51  
52  
53  
54  
55  
56  
57  
58  
59  
60

For peer review only



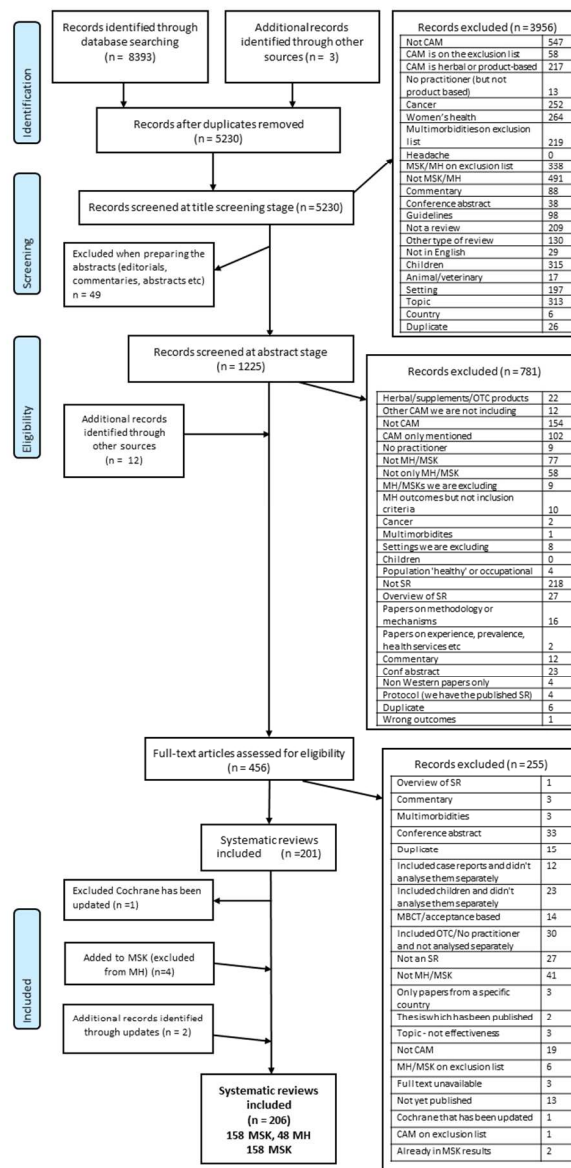

Figure 1: PRISMA flowchart

62x121mm (300 x 300 DPI)



|                               | <b>Include</b>                                                                                                                                                                                                                                                                                                                                                                                                                                                                                                                                                                                                                                                                                                                                                                          | <b>Exclude</b>                                                                                                                                                                                                                                                                                                                                                                                                                                                                                                                                                                                                                                                                                                                                                                                                                                                  |
|-------------------------------|-----------------------------------------------------------------------------------------------------------------------------------------------------------------------------------------------------------------------------------------------------------------------------------------------------------------------------------------------------------------------------------------------------------------------------------------------------------------------------------------------------------------------------------------------------------------------------------------------------------------------------------------------------------------------------------------------------------------------------------------------------------------------------------------|-----------------------------------------------------------------------------------------------------------------------------------------------------------------------------------------------------------------------------------------------------------------------------------------------------------------------------------------------------------------------------------------------------------------------------------------------------------------------------------------------------------------------------------------------------------------------------------------------------------------------------------------------------------------------------------------------------------------------------------------------------------------------------------------------------------------------------------------------------------------|
| <b>Types of review</b>        | Systematic review and/or meta-analysis                                                                                                                                                                                                                                                                                                                                                                                                                                                                                                                                                                                                                                                                                                                                                  | Non-systematic searches; clinical summaries; mechanism reviews; conceptual reviews; historical reviews; herbal monographs; opinions/editorials; reviews of qualitative studies. Reviews including case studies. Reviews only available as an abstract                                                                                                                                                                                                                                                                                                                                                                                                                                                                                                                                                                                                           |
| <b>Topic of review</b>        | Efficacy, effectiveness, cost-effectiveness, safety                                                                                                                                                                                                                                                                                                                                                                                                                                                                                                                                                                                                                                                                                                                                     | Any other focus including prevalence, mechanisms                                                                                                                                                                                                                                                                                                                                                                                                                                                                                                                                                                                                                                                                                                                                                                                                                |
| <b>CAM</b>                    | Any under the MeSH term CAM, except those in the adjacent column (acupuncture (body or ear), acupressure, electroacupuncture, laser acupuncture, Alexander technique, aromatherapy, art therapy, anthroposophy, autogenic training, balneotherapy/hydrotherapy, Bowen, chiropractic, craniosacral, emotional freedom technique, Feldenkrais, guided imagery, kinesiology, homeopathy, hypnosis, integrative medicine, massage, manual therapy or manipulation, meditation, mindfulness, moxibustion, music therapy, naturopathy, osteopathy, Pilates, qi gong, reflexology, relaxation therapy, reiki, shiatsu, spiritual therapies, spiritual healing, tai chi, therapeutic touch, traditional medicine (all types - including TCM approaches such as tuina and guasha), trager, yoga) | Those which are not considered CAM in a UK NHS setting: acoustic stimulation, bee venom acupuncture, biofeedback, breathing exercises, cell therapy, colour therapy, dance therapy, detoxification, deep transverse friction massage, diets, horticultural therapy, light therapy, leech therapy, lifestyle changes, laughter therapy, low level laser therapy (included laser acupuncture which is based on TCM acupuncture points), MBCT, mental healing, magnet therapy, NLP, neural therapy, prayer, play therapy, psychodrama, psychophysiology, prolotherapy, sensory art therapy, suggestion, transcranial magnetic stimulation, TENS rejuvenation, western medicine<br>Herbal medicine/phytotherapy, as the majority of studies do not involve a practitioner<br>Oral or topical CAM which are given to the patient without the input of a practitioner |
| <b>Intervention details</b>   | Practitioner-based CAM only                                                                                                                                                                                                                                                                                                                                                                                                                                                                                                                                                                                                                                                                                                                                                             | Over-the-counter, online, self-help only.                                                                                                                                                                                                                                                                                                                                                                                                                                                                                                                                                                                                                                                                                                                                                                                                                       |
|                               | The CAM must be the main focus of the paper.                                                                                                                                                                                                                                                                                                                                                                                                                                                                                                                                                                                                                                                                                                                                            | CAM is only mentioned amongst a list of other active interventions                                                                                                                                                                                                                                                                                                                                                                                                                                                                                                                                                                                                                                                                                                                                                                                              |
| <b>MSK: muscular diseases</b> | Muscular diseases                                                                                                                                                                                                                                                                                                                                                                                                                                                                                                                                                                                                                                                                                                                                                                       | Carpal tunnel; compartment syndromes; contracture; craniomandibular disorders; eosinophilia-myalgia syndrome; muscle cramp; muscular abnormalities; muscle neoplasms; mitochondrial myopathies; myositis; paralysis; rhabdomyolysis; spinal stenosis                                                                                                                                                                                                                                                                                                                                                                                                                                                                                                                                                                                                            |

|                                                                          |                                                                   |                                                                                                                                                                                                                                                                                                                                                                                   |
|--------------------------------------------------------------------------|-------------------------------------------------------------------|-----------------------------------------------------------------------------------------------------------------------------------------------------------------------------------------------------------------------------------------------------------------------------------------------------------------------------------------------------------------------------------|
| <b>MSK: bone diseases</b>                                                | Osteoarthropathy                                                  | All other bone diseases                                                                                                                                                                                                                                                                                                                                                           |
| <b>MSK: rheumatic diseases</b>                                           | Arthritis, Fibromyalgia                                           | Juvenile arthritis; rheumatic fever; sternocostoclavicular; hyperostosis; infectious arthritis; Reiter's disease; rheumatic fever                                                                                                                                                                                                                                                 |
| <b>MSK: other</b>                                                        | Musculoskeletal pain                                              | Abdominal pain; cranial pain; ear ache; eye pain; facial pain; headache/migraine; jaw disorders; labour pain; nipple pain; neuralgia; neuropathic pain; pelvic pain; phantom limb pain; sprains                                                                                                                                                                                   |
| <b>MH (as diagnoses or symptoms not just outcomes)</b>                   | Anxiety; stress; bipolar; loneliness, low mood                    | Autism; Alzheimer's; ADHD; child/domestic abuse; delusions; dementia; delirium; eating disorders; learning/intellectual disorders; OCD; Parkinson's; personality disorders; psychotic conditions; psychological trauma; PTSD; quality of life; sexual/gender disorders; substance misuse/abuse; substance abuse; schizophrenia; serious mental health; suicide; sexual disorders; |
|                                                                          | Somatoform disorders                                              | Hypochondriasis                                                                                                                                                                                                                                                                                                                                                                   |
|                                                                          | Depression                                                        | Postpartum or premenstrual depression; postoperative depression; depressive psychosis; atypical depression                                                                                                                                                                                                                                                                        |
|                                                                          | Stress, stress management                                         | Financial strain; oxidative stress; physiological stress; posttraumatic stress; stress incontinence                                                                                                                                                                                                                                                                               |
|                                                                          | Sleep problems, insomnia                                          | Restless leg syndrome                                                                                                                                                                                                                                                                                                                                                             |
| <b>Other multimorbidities/ populations: serious/long term conditions</b> | Cardiovascular; diabetes; digestive issues; obesity; respiratory; | Asthma; brain injury; cancer chronic fatigue syndrome; cystic fibrosis; epilepsy; hepatitis; HIV/AIDS; kidney disease; multiple sclerosis, stroke/post stroke; sleep apnoea                                                                                                                                                                                                       |
| <b>Other multimorbidities/ populations: acute conditions</b>             | None                                                              | Injuries, infections                                                                                                                                                                                                                                                                                                                                                              |
| <b>Other multimorbidities/ populations: settings</b>                     | Carers                                                            | Critical illness; intensive care; military; nursing home; palliative care; prisons; surgery                                                                                                                                                                                                                                                                                       |
| <b>Other multimorbidities/ populations: women's health</b>               | -                                                                 | Endometriosis; infertility; labour/postpartum/pregnancy; PCOS; menopause; menstrual pain; pelvic pain                                                                                                                                                                                                                                                                             |
| <b>Other multimorbidities/ populations: disabilities</b>                 | -                                                                 | Memory impairment                                                                                                                                                                                                                                                                                                                                                                 |
|                                                                          | -                                                                 | Hearing loss/impairment                                                                                                                                                                                                                                                                                                                                                           |
|                                                                          | -                                                                 | Vision loss/impairment                                                                                                                                                                                                                                                                                                                                                            |

|                             |                                                                                                   |                                                                     |
|-----------------------------|---------------------------------------------------------------------------------------------------|---------------------------------------------------------------------|
| <b>Population</b>           | Adults only $\geq$ 18yrs (include if children were included but reported and analysed separately) | Animal studies or laboratory studies                                |
|                             | Need to be generalisable to GP population                                                         | Healthy populations or specific occupations (e.g. nurses, teachers) |
| <b>Language</b>             | English only                                                                                      | Any other language                                                  |
| <b>Date of publication</b>  | 2005 or later                                                                                     | Pre 2005                                                            |
| <b>For trial registries</b> | Only those which were completed and we had not picked up in other searches                        | Currently recruiting or not recruiting                              |
| <b>Country</b>              | Reviews including studies from Western countries                                                  | Review of studies from only non-Western countries                   |

AMSTAR items reported in MSK reviews

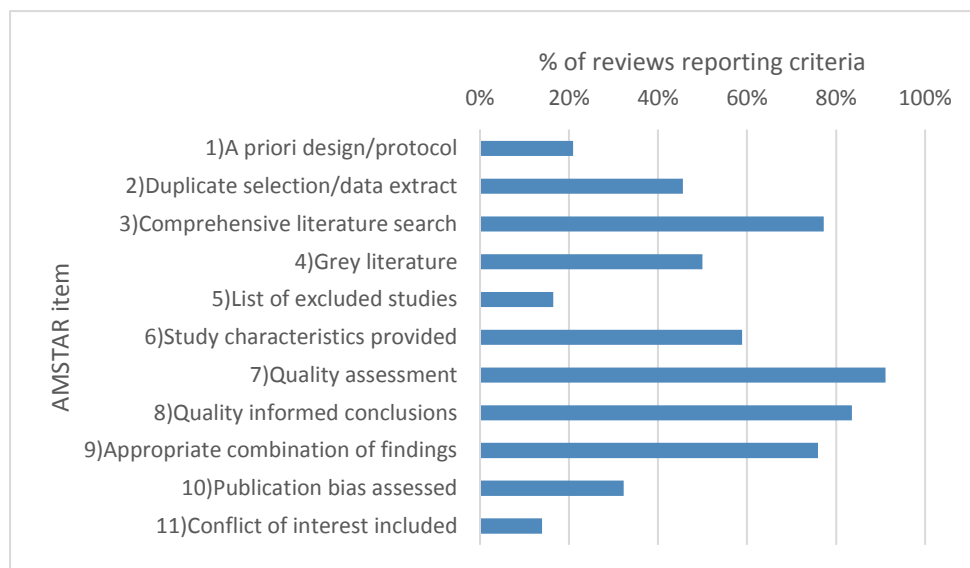

AMSTAR items reported in MH reviews

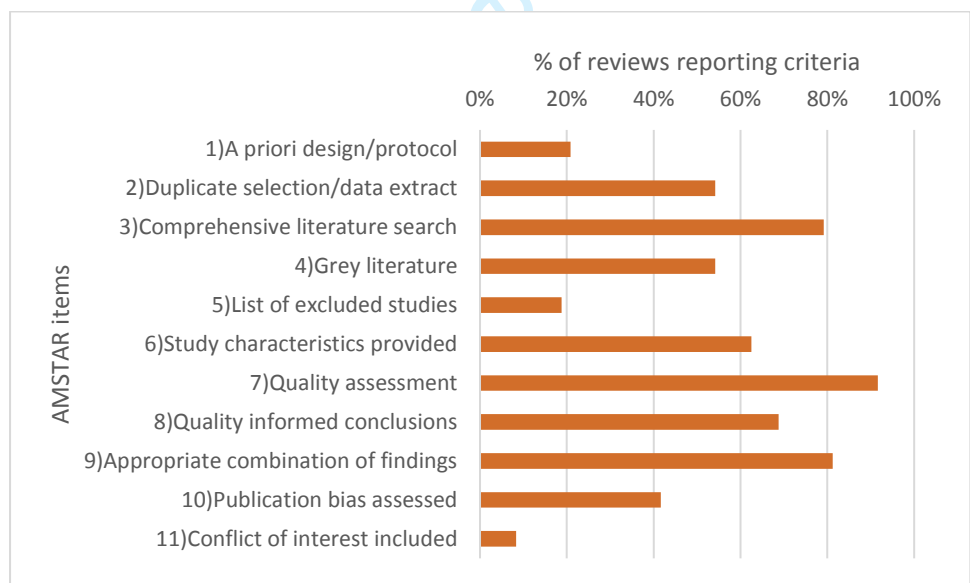

# BMJ Open

## A Scoping Review of Systematic Reviews of Complementary Medicine for Musculoskeletal and Mental Health Conditions.

|                                 |                                                                                                                                                                                                                                                                                                                                                                         |
|---------------------------------|-------------------------------------------------------------------------------------------------------------------------------------------------------------------------------------------------------------------------------------------------------------------------------------------------------------------------------------------------------------------------|
| Journal:                        | <i>BMJ Open</i>                                                                                                                                                                                                                                                                                                                                                         |
| Manuscript ID                   | bmjopen-2017-020222.R2                                                                                                                                                                                                                                                                                                                                                  |
| Article Type:                   | Research                                                                                                                                                                                                                                                                                                                                                                |
| Date Submitted by the Author:   | 14-Jun-2018                                                                                                                                                                                                                                                                                                                                                             |
| Complete List of Authors:       | Lorenc, Ava<br>Feder, Gene; University of Bristol, Community based medicine<br>MacPherson, Hugh; University of York, Health Sciences<br>Little, Paul; University of Southampton, Primary Care and Population Science;<br>Mercer, Stewart; University of Glasgow, Institute of Health and Wellbeing<br>Sharp, Deborah; University of Bristol, Population Health Sciences |
| <b>Primary Subject Heading</b>: | Complementary medicine                                                                                                                                                                                                                                                                                                                                                  |
| Secondary Subject Heading:      | Mental health, General practice / Family practice                                                                                                                                                                                                                                                                                                                       |
| Keywords:                       | COMPLEMENTARY MEDICINE, Musculoskeletal disorders < ORTHOPAEDIC & TRAUMA SURGERY, MENTAL HEALTH, PRIMARY CARE                                                                                                                                                                                                                                                           |
|                                 |                                                                                                                                                                                                                                                                                                                                                                         |

SCHOLARONE™  
Manuscripts

Peer Review Only

# A Scoping Review of Systematic Reviews of Complementary Medicine for Musculoskeletal and Mental Health conditions.

Ava Lorenc\*, Population Health Sciences, Bristol Medical School, Bristol, UK.

Gene Feder, Population Health Sciences, Bristol Medical School, Bristol, UK

Hugh MacPherson, Department of Health Sciences, University of York, York, UK

Paul Little, Primary Care and Population Sciences Unit, University of Southampton, Southampton, UK

Stewart W Mercer, General Practice and Primary Care, Institute of Health and Wellbeing, University of Glasgow, Scotland, UK

Deborah Sharp, Population Health Sciences, Bristol Medical School, Bristol, UK

\*Corresponding author: [Ava.lorenc@bristol.ac.uk](mailto:Ava.lorenc@bristol.ac.uk); 0117 3313902

Word count: 4201

## ABSTRACT

Objective: To identify potentially effective complementary and alternative medicine (CAM) for musculoskeletal (MSK)- mental health (MH) comorbidity, by synthesising evidence on effectiveness, cost-effectiveness and safety from systematic reviews (SRs).

Design: Scoping review of systematic reviews.

Methods: We searched literature databases, registries, reference lists, and contacted key authors and professional organisations, to identify SRs of randomised controlled trials for CAM for MSK or MH. Inclusion criteria were: published after 2004, studying adults, in English and scoring > 50% on AMSTAR (quality appraisal checklist). SRs were synthesised to identify research priorities, based on moderate/good quality evidence, sample size, and indication of cost-effectiveness and safety.

Results: We included 84 MSK SRs and 27 MH SRs. Only one focussed on MSK-MH comorbidity. Meditative approaches and yoga may improve MH outcomes in MSK populations. Yoga and tai chi had moderate/good evidence for MSK and MH conditions. SRs reported moderate/good quality evidence (any comparator) in a moderate/large population for: low back pain (LBP; yoga, acupuncture, spinal manipulation/mobilisation, osteopathy), osteoarthritis (acupuncture, tai chi), neck pain (acupuncture, manipulation/manual therapy), myofascial trigger point pain (acupuncture), depression (MBSR, meditation, tai chi, relaxation), anxiety (meditation/MBSR, moving meditation, yoga), sleep disorders (meditative/mind-body movement), and stress/distress (mindfulness). The majority of these CAM had some evidence of safety - only three had evidence of harm. There was some evidence of cost effectiveness for spinal manipulation/mobilisation and acupuncture for LBP, and manual therapy/manipulation for neck pain, but few SRs reviewed cost effectiveness and many found no data.

Conclusions: Only one SR studied MSK-MH comorbidity. Research priorities for CAM for both MSK and MH (low back pain, osteoarthritis, depression, anxiety and sleep problems) are yoga, mindfulness, and tai chi. Despite the large number of SRs and the prevalence of comorbidity, more high quality, large randomised controlled trials in comorbid populations are needed.

## STRENGTHS AND LIMITATIONS OF THIS STUDY:

1. A comprehensive scoping review covering a wide range of individual MSK and MH conditions, in the notable dearth of SRs/randomised controlled trials in comorbid populations
2. This review used systematic searching and screening techniques
3. Results are limited by our pragmatic choice to only include high-quality (high scoring on AMSTAR) systematic reviews and definition of CAM as including a practitioner in its delivery.
4. Date and language limitations may have excluded some topics.



## INTRODUCTION

Musculoskeletal (MSK) and mental health (MH) disorders are two conditions resulting in some of the highest burden in terms of disability, accounting for 30.5% and 21.1% of Years Lived with Disability respectively.[1] Both affect one in four UK adults at some point in their life.[2-4] MSK disorders lead to very high healthcare expenditure and loss of work,[5] in the UK accounting for 7.5 million working days lost annually[6] and 60% of occupational sick leave.[2] In England, it has been estimated that MH costs £105 billion, and treatment costs are expected to rise substantially.[7]

Low back pain is one of the most common health conditions,[8-10] with a mean global general population prevalence (regardless of prevalence period) of 31% [10] and a UK prevalent population of 17.3 million, with 3.1 million adults suffering during an entire year[11], costing the NHS over £500 million/year.[12] In the UK, 8.75 million people sought primary care treatment for osteoarthritis (over a 7 year consultation period)[13] which is estimated to have resulted in £14.8 billion indirect costs.[14]

The most common MH conditions are depression and anxiety.[3 4] In England, 19% of the general adult population reported ever being diagnosed with depression and 6% ever being diagnosed with generalised anxiety disorder.[15] Insomnia is another common MH problem, affecting 6.4% of the UK general population.[16]

There is an increasing recognition of the importance of multimorbidity, that is, the co-existence of two or more physical and/or mental long-term conditions in an individual, which is becoming the norm in the UK.[17-19] In a cross-sectional study in Scotland, 8.3% of primary care patients (36% of those with multimorbidity), had both a physical and a mental health disorder[20] and around 50% of patients with depression had pain symptoms.[21] Long term MSK disorders are closely associated with multimorbidity.[22]

Complementary and alternative medicine (CAM) is “a diverse group of health-related therapies and disciplines which are not considered to be a part of mainstream medical care”, including osteopathy, chiropractic, acupuncture, herbal medicine and homeopathy.[23] Estimates of 12-month prevalence of use of any CAM are 0.3-86% in Europe[24] and 26% in England.[25]

Many MSK and MH conditions, and comorbid MSK and MH, have limited conventional treatment options - ‘effectiveness gaps’, which are potential key areas for CAM.[26 27] Both MH[28-30] and MSK[31 32] are common reasons for patients to use CAM. We used scoping methodology to identify priority areas where CAM may be useful.[33] The overall aim of scoping studies is ‘to map rapidly the key concepts underpinning a research area and the main sources and types of evidence available’ in a formal, systematic and transparent way (which is often lacking in research priority setting exercises).[34] Scoping study methodology was used to identify gaps in the research base and priorities for future research. Scoping work is an essential step in the development of a strategy for the integration of CAM with conventional care.[27] Preliminary searches showed that evidence for comorbid populations was very limited, so we chose to include independent evidence on MSK and MH conditions. This review was part of a wider scoping study, which obtained a breadth of perspectives - the results of this review were combined with findings from consultation with conventional and CAM practitioners, a public survey, and case studies of NHS provision of CAM, to inform the final choice of conditions and CAM approaches for an RCT.

## METHODS

The scoping study followed Arksey and O'Malley's [33] framework plus the refinements suggested by Levac et al.[35], Daudt et al [36] and Colquhoun et al.[37] Scoping reviews are broader and more exploratory than systematic reviews. They review a large number of papers to map the evidence – focussing on breadth rather than detail; have few preconceived ideas regarding focus (particularly types of MSK/MH in this context); do not necessarily assess individual study quality; and use a narrative approach to analysis, rather than synthesising or aggregating quantitative data.[33] The reader is advised to refer to original SRs for more detail.

### Aims

This study aimed to identify which practitioner-based CAM have evidence for both musculoskeletal disorders (MSK) and mental health conditions (MH) in order to identify research priorities in terms of treatment choice and specific patient groups/conditions for a future pragmatic trial of comorbid MSK and MH in UK primary care. The specific aims were to:

- collate the evidence on effectiveness, cost-effectiveness and safety from recent systematic reviews (SRs) of trials of CAM for MSK and MH conditions
- identify areas where there is high quality evidence of effectiveness but sufficient uncertainty to justify a trial
- identify areas where there is also some evidence of cost-effectiveness and safety

### Searches

As this was a scoping review, we used a wide range of methods to identify SRs (published, unpublished, in progress). Literature databases were searched (see below for details of searches): AMED, Medline, EMBASE, CINAHL, PsycINFO; Index to theses; Cochrane library; Epistemonikos; SIGLE. Three trial registries were searched (UKCRN; Health service research projects in progress; Prospero). Reference lists of 'overviews of SRs' and reports (from professional/patient organisations) were searched. We emailed key authors in the field. We also asked the project team, steering group and public and patient involvement (PPI) group, and used websites/social media (university websites, Research Gate and Twitter) to access the wider research community. We asked patient and professional organisations to ask their members for any information (by email, newsletters or social media), these included: disease specific organisations e.g. Arthritis Research UK, Back Care and MIND; CAM organisations e.g. Research Council for Complementary Medicine and Complementary and Natural Healthcare Council; primary care organisations e.g. UK Royal College of General Practitioners. We presented at one conference and distributed a flyer at another. We contacted the authors of eligible conference abstracts and protocols to ascertain if the SR was available e.g. submitted or in press.

For complementary medicine we used MeSH terms or subject headings, plus additional terms for CAM which were not indexed. To ensure relevance to UK primary care, we only included CAM which involve practitioner-led treatment. We therefore excluded herbal medicine, as the majority of studies do not involve a practitioner. We included manipulation, manual therapy and mobilisation as techniques commonly practised by some CAM practitioners (as well as conventional practitioners). For musculoskeletal conditions, we used 'musculoskeletal diseases/disorders' as index terms, adding in any which were missing. For mental health, we searched for common, minor mental health disorders and symptoms, excluding long term/severe mental illnesses. Thus, words in

1  
2  
3 titles/abstracts were searched for (rather than subject headings), with reviews needing to include  
4 patients with MH symptoms/diagnoses rather than just measuring MH outcomes. See Appendix 1  
5 for a full list of included and excluded non MSK or MH conditions.

6  
7 Database searches were conducted in June 2015 and updated in February 2016, in collaboration  
8 with a librarian. We used filters for SRs. We excluded reviews published pre-2005, in order to make  
9 the final number of papers manageable with minimal impact on our results (given that the majority  
10 of SRs were published in 2010 and after (122/158 SRs). We only included English language reviews.  
11 Databases were searched for two topics: complementary medicine + musculoskeletal disorders and  
12 complementary medicine + mental health. See Appendix 1 for details and Appendix 2 for an example  
13 search.  
14

15 We used the inclusion/exclusion criteria (see Appendix 1) to screen the results from each search.  
16 This was a multi-stage process involving the whole project team. AL screened the titles of all search  
17 results, and DS checked the results, with any disagreements discussed and inclusion criteria  
18 amended accordingly. AL then screened the abstracts, which were also independently screened by  
19 another author. Results were compared, any disagreements discussed, and the criteria again  
20 amended accordingly. Any remaining disagreements were discussed and resolved with a third  
21 author. AL then screened the full text of the agreed papers.  
22  
23

#### 24 **Data extraction**

25 AL extracted the following data from each SR: author, year, location, CAM/s, health condition/s, for  
26 MSK reviews whether MH was included and for MH reviews whether findings applied to MSK  
27 populations, methodological features (sources searched, inclusion/exclusion criteria, quality  
28 assessment), results and conclusions (effectiveness, safety, cost-effectiveness). Where possible  
29 these data were copied and pasted directly to avoid any misinterpretation.  
30  
31

#### 32 **Quality appraisal of SRs**

33 Although not essential,[33] quality assessment is recommended in scoping reviews.[38] We used a  
34 limited quality appraisal of SRs to help inform prioritisation: AMSTAR, a validated checklist.[39] Due  
35 to time constraints and the number of SRs to be appraised, a simple procedure was followed, using  
36 the 'search' function in the text of SRs to find particular terms. The emphasis was on obtaining  
37 relative scores, allowing ranking of the included reviews, rather than an absolute score of quality.  
38 For each of the 11 items on the AMSTAR checklist, a score of 0 was given if they did not meet the  
39 criteria, or if information was unavailable, and a score of 1 if the criteria were met. The scores were  
40 summed to give a score for each SR out of a total of 11.  
41  
42

43 Any reviews which scored 5 or less (half of the possible total) on AMSTAR were not considered in the  
44 evidence synthesis.  
45

#### 46 **Evidence synthesis**

47 In line with Arksey & O'Malley's [33] framework for conducting scoping reviews, we used a  
48 'descriptive-analytical' method, based in the narrative tradition, applying a common analytical  
49 framework to the reviews. Evidence synthesis was performed by AL and all authors met regularly to  
50 discuss the process and emerging results.  
51

52 Reviews were placed into a matrix of health condition/symptom vs CAM, for example low back pain  
53 and acupuncture (see Tables 1 and 2).  
54  
55  
56  
57  
58  
59  
60

Where there was more than one SR in an area, one (occasionally more than one – where they studied different interventions e.g. types of manipulation) was prioritised, based on recency, breadth, quality (AMSTAR score) and level of analysis (e.g. meta-analysis).

There were three steps to the evidence synthesis: step 1) extraction and narrative synthesis of data from prioritised SRs, step 2) ranking of areas (condition vs CAM) using an Excel framework (see below for ranking criteria), step 3) computation of sample size.

**Step 1 Data extraction:** For each area (condition vs CAM) in the matrix, data were synthesised for:

- effectiveness: the conclusions on effectiveness were extracted from the prioritised SR/s, including information on comparator and outcomes.
- quality of studies: in line with guidance on scoping reviews [33] we did not assess the quality of the individual RCTs in each SR, but synthesised the SR authors' conclusions about quality, from the prioritised review/s. We had three categories of quality – poor, moderate or good. Moderate included SRs reporting mixed results.
- safety: any information on safety was synthesised across all the included SRs
- cost effectiveness: any information on cost effectiveness was synthesised across all the included SRs.

**Step 2 Ranking:** Using the information extracted in step 1 we ranked the areas in the matrix (condition vs CAM), based on consideration of the following criteria:

1. **Effectiveness** - Areas were ranked highly where there was enough moderate/good quality evidence to establish proof of concept, but still key gaps. Data on effectiveness came from the conclusions of the prioritised SRs regarding effectiveness and quality.
2. **Safety** - areas where there was evidence of harm were ranked lower
3. **Cost** – areas where there was any indication that the intervention may have potential for cost effectiveness were ranked highly
4. **Comorbidity** - any interventions that showed an indication (of any quality) for comorbid MH and MSK patients were ranked highly

**Step 3 Sample size:** once a ranked list of areas had been compiled, information on total sample size for the prioritised SR/s (i.e. total number of participants in the trials included in the SR/s) was added to allow further discrimination, classified as: small (<500 participants); medium (501 to 3000); or large (>3000).

### Patient and Public Involvement

The wider scoping study included a patient and public involvement (PPI) group of seven people with experience of MSK/MH issues, who advised the research team on a variety of issues as the study took shape and progressed. They met 4 times over the study period and provided input into the literature review questions, search strategy and selection criteria. The PPI group also provided ideas on ways to disseminate the findings to the general public and to patient groups.

## RESULTS

## Search results

**Error! Reference source not found.** shows the PRISMA flowchart of the searches.[40] Searches resulted in 8393 references – 4304 for MH and 4089 for MSK, plus 3 for MH identified elsewhere (email update sent by journal publisher). After removing duplicates, Cochrane reviews which were withdrawn, Cochrane reviews which had been updated, or those not in English, 5230 records remained for title screening. This resulted in 486 MH and 739 MSK records for the abstract screening phase. We then excluded 49 (13 MH and 36 MSK) records i.e. editorials, commentaries, abstracts etc. After abstract screening, there remained 444 studies (180 MH and 264 MSK). At this stage, a further 12 records were added – 3 from grey literature (Prospero/Sigle/HSRProj), 5 from conference abstracts, and 4 from the reference lists of overviews of SRs and other key reports. This produced 456 records to be screened at the full text stage, after which 206 records remained: 48 MH, 158 MSK.

During screening at the title stage (AL and DS) there were 49 disagreements (out of 4411 records; 1%). During abstract screening (AL and each of the 6 authors) there were a total of 296 initial disagreements (out of 1165 records; 25%). Most were resolved by discussion without requiring a third reviewer.

Of the 158 MSK systematic reviews, 84 were included as high quality (scored 6 or more on AMSTAR): Low back pain,[41-70] fibromyalgia,[71-82] neck pain,[41 83-91] osteoarthritis,[92-102] rheumatoid arthritis,[98 103-106] general MSK pain/conditions,[107-111] shoulder pain/disorders,[112-116] myofascial trigger point pain,[107 117 118] and other MSD conditions.[107 119-124]

The 158 reviews covered 17 different CAMs and 15 different disorders. The overall matrix is shown below in Table 1. Low back pain was by far the most common topic, addressed by 64/158 (40%) of reviews. Fibromyalgia was the next most common, followed by osteoarthritis then neck pain/disorders. Acupuncture was the most common CAM studied (58/158 SRs; 37%), followed by manual therapy (including manipulation and mobilisation). The mean AMSTAR score for methodological quality of MSK reviews was 6/11 (ranging from 0 to 11). Appendix 3 shows which items on the AMSTAR checklist were reported by the reviews.

| Table 1: Matrix of MSK reviews (numbers = number of reviews) |                                                  | Low back pain |              | Fibro-myalgia |              | Neck pain/disorders |              | Osteo arthritis |              | Rheumatoid arthritis |              | MSK pain/conditions |              | Myofascial pain |              | Shoulder pain/disorder |              | Other        |              | Total <sup>1</sup> |
|--------------------------------------------------------------|--------------------------------------------------|---------------|--------------|---------------|--------------|---------------------|--------------|-----------------|--------------|----------------------|--------------|---------------------|--------------|-----------------|--------------|------------------------|--------------|--------------|--------------|--------------------|
|                                                              |                                                  | Total number  | High quality | Total number  | High quality | Total number        | High quality | Total number    | High quality | Total number         | High quality | Total number        | High quality | Total number    | High quality | Total number           | High quality | Total number | High quality |                    |
| Acupuncture related                                          | Acupressure                                      | 2             | 2            |               |              | 2                   | 1            |                 |              |                      |              | 1                   | 1            |                 |              |                        |              | 1            | 0            | 6                  |
|                                                              | Acupuncture                                      | 12            | 6            | 9             | 6            | 5                   | 2            | 10              | 6            | 4                    | 2            | 4                   | 2            | 6               | 3            | 2                      | 1            | 6            | 5            | 58                 |
|                                                              | Moxibustion                                      | 1             | 0            | 1             | 0            |                     |              | 1               | 0            | 2                    | 1            |                     |              |                 |              |                        |              | 1            | 0            | 6                  |
| Manipulation                                                 | Chiropractic                                     | 2             | 1            | 3             | 1            |                     |              | 1               | 0            |                      |              |                     |              | 1               | 0            |                        |              |              |              | 7                  |
|                                                              | Manual therapy/spinal manipulation/ mobilisation | 12            | 9            | 8             | 4            | 14                  | 9            | 2               | 1            |                      |              | 1                   | 0            | 1               | 0            | 5                      | 3            | 3            | 2            | 46                 |
|                                                              | Osteopathy                                       | 3             | 2            | 2             | 1            |                     |              |                 |              |                      |              | 1                   | 1            |                 |              |                        |              |              |              | 6                  |
| Other                                                        | Integrative therapies/Multiple CAM               | 2             | 2            | 2             | 2            |                     |              |                 |              |                      |              |                     |              |                 |              |                        |              |              |              | 4                  |
|                                                              | Tai chi                                          | 1             | 1            | 1             | 0            | 1                   | 0            | 7               | 5            | 3                    | 1            | 1                   | 1            |                 |              |                        |              |              |              | 14                 |
|                                                              | Qigong                                           |               |              |               |              | 1                   | 0            | 1               | 0            | 1                    | 0            |                     |              |                 |              |                        |              |              |              | 3                  |
|                                                              | Pilates                                          | 10            | 5            |               |              |                     |              |                 |              |                      |              |                     |              |                 |              |                        |              |              |              | 10                 |
|                                                              | CAM exercise                                     |               |              | 2             | 2            |                     |              |                 |              |                      |              |                     |              |                 |              |                        |              |              |              | 2                  |
|                                                              | Yoga                                             | 8             | 4            | 1             | 1            | 1                   | 0            | 3               | 0            | 1                    | 0            | 1                   | 1            |                 |              |                        |              |              |              | 15                 |
|                                                              | Mindfulness/meditation                           | 2             | 0            | 5             | 3            |                     |              |                 |              | 2                    | 0            | 4                   | 2            |                 |              |                        |              |              |              | 13                 |
|                                                              | Relaxation                                       |               |              | 3             | 1            |                     |              | 1               | 0            | 1                    | 0            | 1                   | 0            |                 |              |                        |              |              |              | 6                  |
|                                                              | Hypnotherapy                                     | 1             | 0            | 1             | 1            |                     |              | 1               | 0            | 1                    | 0            |                     |              |                 |              |                        |              |              |              | 4                  |
|                                                              | Spa therapy/balneotherapy                        | 2             | 1            | 2             | 1            |                     |              |                 |              | 1                    | 1            |                     |              |                 |              |                        |              |              |              | 5                  |
|                                                              | TCM bodywork                                     | 2             | 1            |               |              | 1                   | 0            |                 |              |                      |              | 1                   | 0            |                 |              |                        |              |              |              | 4                  |
| Massage/therapeutic touch                                    | 4                                                | 2             |              |               | 4            | 2                   | 1            | 0               | 1            | 0                    | 1            | 0                   |              |                 | 1            | 0                      | 1            | 1            | 13           |                    |
| Homeopathy                                                   |                                                  |               | 2            | 0             |              |                     |              |                 |              |                      |              |                     |              |                 |              |                        |              |              | 2            |                    |
| <b>Total<sup>1</sup></b>                                     |                                                  | <b>64</b>     | <b>36</b>    | <b>42</b>     | <b>23</b>    | <b>29</b>           | <b>14</b>    | <b>28</b>       | <b>12</b>    | <b>17</b>            | <b>5</b>     | <b>16</b>           | <b>8</b>     | <b>8</b>        | <b>3</b>     | <b>8</b>               | <b>4</b>     | <b>12</b>    | <b>8</b>     | <b>158 (84)</b>    |

1. Note that reviews can occur in more than one row/column

Of the 48 MH systematic reviews, 27 were high quality (scored 6 or more on AMSTAR): depression, [125-135] anxiety,[125 126 130 134 136-143] sleep,[144-151] stress,[125 126 141] and other.[125] The 48 reviews covered 18 different CAMs and five different categories of MH symptom or disorder. The overall matrix is shown below in Table 2. Many of the reviews included more than one MH condition. Of the 48 reviews, 36 (75%) included depression. Meditation, yoga, acupuncture and meditative movement were the most common CAM. Appendix 3 shows which items on the AMSTAR checklist were reported by the reviews.

| Table 2 : Matrix of MH reviews (numbers = number of reviews) |                                                   | Depression   |              | Anxiety      |              | Stress       |              | Insomnia / sleep |              | Distress (psychological) |              | Total <sup>1</sup> |
|--------------------------------------------------------------|---------------------------------------------------|--------------|--------------|--------------|--------------|--------------|--------------|------------------|--------------|--------------------------|--------------|--------------------|
|                                                              |                                                   | Total number | High quality | Total number | High quality | Total number | High quality | Total number     | High quality | Total number             | High quality |                    |
| <b>Acupuncture</b>                                           | Acupuncture                                       | 9            | 3            | 2            | 1            |              |              | 2                | 1            |                          |              | 6                  |
|                                                              | Auricular acupuncture                             |              |              |              |              |              |              | 3                | 1            |                          |              | 4                  |
| <b>Multiple</b>                                              | CAM (multiple) (did not separate CAM in analysis) | 1            | 0            | 1            | 0            |              |              | 2                | 1            |                          |              | 4                  |
| <b>Meditation/ mindfulness</b>                               | Mindfulness                                       | 3            | 2            | 1            | 1            | 1            | 1            |                  |              | 1                        | 1            | 5                  |
|                                                              | Meditation                                        |              |              | 3            | 3            | 1            | 1            | 1                | 0            |                          |              | 9                  |
| <b>Exercise</b>                                              | Meditative Movement                               |              |              |              |              |              |              | 3                | 3            |                          |              | 6                  |
|                                                              | Qigong                                            | 4            | 1            | 2            | 1            | 1            | 1            |                  |              |                          |              | 5                  |
|                                                              | Tai chi                                           | 4            | 2            | 1            | 0            |              |              | 3                | 1            |                          |              | 5                  |
|                                                              | Yoga                                              | 4            | 2            | 3            | 3            | 1            | 0            | 1                | 0            |                          |              | 8                  |
| <b>Other</b>                                                 | Homeopathy                                        |              |              |              |              |              |              | 1                | 1            |                          |              | 2                  |
|                                                              | Hypnosis                                          | 2            | 0            |              |              |              |              | 2                | 2            |                          |              | 4                  |
|                                                              | Music therapy                                     | 3            | 2            | 1            | 1            |              |              |                  |              |                          |              | 2                  |
|                                                              | Relaxation                                        | 3            | 1            | 1            | 1            |              |              | 1                | 1            |                          |              | 4                  |
|                                                              | Reflexology                                       |              |              |              |              |              |              | 1                | 0            |                          |              | 1                  |
|                                                              | Reiki                                             | 1            | 1            | 1            | 1            |              |              |                  |              |                          |              | 2                  |
|                                                              | Spinal manipulation                               |              |              |              |              |              |              |                  |              |                          |              | 0                  |
|                                                              | Massage/therapeutic touch                         | 2            | 1            | 2            | 2            |              |              |                  |              |                          |              | 4                  |
| Morita therapy                                               |                                                   |              | 1            | 1            |              |              |              |                  |              |                          |              | 2                  |
| <b>Total<sup>1</sup></b>                                     |                                                   | <b>36</b>    | <b>15</b>    | <b>19</b>    | <b>15</b>    | <b>4</b>     | <b>3</b>     | <b>20</b>        | <b>11</b>    | <b>1</b>                 | <b>1</b>     | <b>48 (27)</b>     |
| 1. Note that reviews can occur in more than one row/column   |                                                   |              |              |              |              |              |              |                  |              |                          |              |                    |

The following sections present a summary of the areas where we found moderate/good quality evidence of effectiveness (from the prioritised SRs). For those conditions with evidence for more than one intervention we have presented the results in tables.



## Evidence for MSK disorders

The areas where there was moderate/good quality evidence were low back pain, myofascial trigger point pain, osteoarthritis (OA), neck pain, fibromyalgia and lateral epicondylitis. It should be noted that the SR quality of evidence is based on the overall assessment of quality of the included RCTs by the SR authors, which is subject to some limitations.

### Low back pain

Moderate/good quality evidence for low back pain (see table 3) was found as follows:

- yoga: four high-quality reviews,[52 61-63] one prioritised[63]
- osteopathy: two high-quality reviews,[65 66] one prioritised[66]
- acupuncture: six high-quality reviews, [41 42 50 51 54 55] two prioritised - as highest quality [41] and most recent[51]
- spinal manipulation/mobilisation: nine high-quality reviews,[41-49] three prioritised (due to differences in types of back pain and interventions included)[41 44 45]
- spa/balneotherapy: one high-quality review[53]
- tai chi: one high-quality review[55]

| Comparator          | Quality  | Population size | CAM                                                                                   | Safety                                          | Cost-effectiveness                                    |
|---------------------|----------|-----------------|---------------------------------------------------------------------------------------|-------------------------------------------------|-------------------------------------------------------|
| Active intervention | Good     | Medium          | Osteopathy[66]                                                                        | Some evidence of harm[66] <sup>1</sup>          | NR                                                    |
|                     | Moderate | Large           | Spinal manipulation/mobilisation (chronic only)[41 44 45]                             | Some evidence of safety [45] <sup>2</sup>       | Mixed results – some evidence of CE [48] <sup>4</sup> |
|                     |          | Medium          | Yoga[63]                                                                              | Some evidence of safety [52 61 63] <sup>3</sup> | No data                                               |
|                     |          | Small           | Balneotherapy [53]                                                                    | Some evidence of safety[53]                     | NR                                                    |
| Usual care          | Moderate | Large           | Acupuncture [41 51] (for pain, function, wellbeing, disability, ROM, quality of life) | Some evidence of safety[54 55] <sup>6</sup>     | Some evidence of CE [41] <sup>7</sup>                 |
|                     |          | Small           | Spa therapy[53]                                                                       | Some evidence of safety[53] <sup>5</sup>        | NR                                                    |
|                     |          |                 | Tai chi [55]                                                                          | NR                                              | NR                                                    |
| Placebo             | Moderate | Large           | Acupuncture (for pain and quality of life; negative evidence for disability). [41 51] | Some evidence of safety[54 55] <sup>6</sup>     | Some evidence of CE [41] <sup>7</sup>                 |

NR = not reported (by SRs)

CE = cost effectiveness

1. Two studies reported minor adverse events
2. One review identified serious adverse events, but this appeared unrelated to treatment. Minor adverse events included muscle soreness, stiffness, and/or transient increase in pain
3. No serious adverse events associated with the yoga
4. Mixed results regarding cost-effectiveness[41], with limited evidence that manual therapy is more cost-effective than usual care [48]
5. No adverse events from one study
6. 5% minor adverse events and no serious adverse events
7. Short-term only

### Osteoarthritis

Moderate/good quality evidence for osteoarthritis (see table 4) was found as follows:

- acupuncture: six high-quality reviews.[92-97], two prioritised – [93] as a Cochrane review and [95] as most recent
- tai chi: five high-quality reviews.[98-102], one prioritised[100]

| Comparator | Quality  | Population size | CAM                              | Safety                                       | Cost-effectiveness |
|------------|----------|-----------------|----------------------------------|----------------------------------------------|--------------------|
| Placebo    | Good     | Large           | Acupuncture [93 95] <sup>1</sup> | some evidence of harm[92 93] <sup>2</sup>    | NR                 |
| Usual care | Moderate | Small           | Tai chi [100] <sup>3</sup>       | Some evidence of safety[99-101] <sup>4</sup> | NR                 |

NR = not reported (by SRs)

1. Compared to pulsed electromagnetic fields, muscle-strengthening or aerobic exercise, weight loss
2. Up to 45% frequency of minor adverse events
3. Only in the short-term
4. SRs concluded tai chi is safe

### Neck pain

Moderate/good quality evidence for neck pain (see table 5) was found as follows:

- manual therapy/manipulation: eight high-quality reviews[41 83-89], three were prioritised due to differing inclusion criteria.[83 88 89]
- Acupuncture: two high-quality reviews, [41 90] one prioritised[90]

| Comparator          | Quality | Population size | CAM                             | Safety           | Cost-effectiveness                      |
|---------------------|---------|-----------------|---------------------------------|------------------|-----------------------------------------|
| Active intervention | Good    | Medium          | Manual therapy[88] <sup>1</sup> | some evidence of | some evidence of CE[88 89] <sup>4</sup> |

|                                                                                                                                                                                                                                                                                                                                                                                                                                                                                                                                                                            |          |        |                                 |                                                     |                                         |
|----------------------------------------------------------------------------------------------------------------------------------------------------------------------------------------------------------------------------------------------------------------------------------------------------------------------------------------------------------------------------------------------------------------------------------------------------------------------------------------------------------------------------------------------------------------------------|----------|--------|---------------------------------|-----------------------------------------------------|-----------------------------------------|
|                                                                                                                                                                                                                                                                                                                                                                                                                                                                                                                                                                            |          |        |                                 | potential harm[83 84] <sup>3</sup>                  |                                         |
|                                                                                                                                                                                                                                                                                                                                                                                                                                                                                                                                                                            | Moderate | Large  | Manipulation[83] <sup>2,5</sup> | some evidence of potential harm[83 84] <sup>3</sup> | some evidence of CE[88 89] <sup>4</sup> |
|                                                                                                                                                                                                                                                                                                                                                                                                                                                                                                                                                                            | Moderate | Small  | Manual therapy[89] <sup>6</sup> | some evidence of potential harm[83 84] <sup>3</sup> | some evidence of CE[88 89] <sup>4</sup> |
| Placebo                                                                                                                                                                                                                                                                                                                                                                                                                                                                                                                                                                    | Moderate | Medium | Acupuncture [90]                | some evidence of safety [90]                        | No data [41]                            |
| Usual care                                                                                                                                                                                                                                                                                                                                                                                                                                                                                                                                                                 | Moderate | Medium | Acupuncture [90]                | some evidence of safety [90]                        | No data [41]                            |
| <p>CE = cost effectiveness</p> <ol style="list-style-type: none"> <li>1. Manual therapy plus exercise compared to exercise alone</li> <li>2. Compared to medication</li> <li>3. Reduced cost of therapy</li> <li>4. Minor adverse events and rare but devastating adverse effects from manipulation</li> <li>5. Also showed effectiveness for pain compared to any control</li> <li>6. Mobilisation, manipulation and soft tissue techniques</li> </ol> <p>There was moderate quality evidence in a medium sized population for a range of other techniques.[83 88 89]</p> |          |        |                                 |                                                     |                                         |

### Fibromyalgia

Acupuncture for fibromyalgia - five high-quality reviews,[71-74 82] one prioritised [73]. The prioritised review found moderate quality evidence in a small population compared to placebo for stiffness (acupuncture) and for pain and sleep disorders (electroacupuncture). However, there was some evidence that acupuncture is less effective than usual care for MH outcomes in fibromyalgia.[73] There is some evidence of safety (no serious adverse events) [71-74 82] but none of cost effectiveness.

### Myofascial trigger point pain

Acupuncture for myofascial trigger point pain – three high-quality reviews [107 117 118]. The prioritised review found good quality evidence in a medium size population compared to placebo and other active interventions for pain in the short and medium term but not in the long term.[118] However, safety, cost-effectiveness, or impact on MH outcomes were not reported.[107 117 118]

### Lateral epicondylitis

One high-quality review [121] found moderate quality evidence for manual therapy (mobilisation with movement)) but the comparator and sample size were not reported so we are unable to include it in our synthesis.

## Evidence for mental health

No reviews provided good quality evidence for CAM for any MH condition nor any evidence of cost-effectiveness, mainly because the latter was not reported.

### Depression

Moderate quality evidence for depression (see table 6) was found as follows:

- mindfulness/meditation: two high quality reviews [125 126] both prioritised as included different types of meditation/mindfulness/MBSR or populations
- tai chi: two high quality reviews [133 135] both prioritised as [135] only reviewed studies of older people ([133] found only poor quality evidence)
- relaxation: one high quality review[130] but comparator and sample size were not reported so it is not included here

| Comparator                                                                                                                                                                                                                                                                                                                              | Quality  | Population size | CAM                                                          | Safety                       | Cost-effectiveness |
|-----------------------------------------------------------------------------------------------------------------------------------------------------------------------------------------------------------------------------------------------------------------------------------------------------------------------------------------|----------|-----------------|--------------------------------------------------------------|------------------------------|--------------------|
| Active intervention                                                                                                                                                                                                                                                                                                                     | Moderate | Medium          | Meditation[126] <sup>1</sup>                                 | Some evidence of safety[126] | No data [125]      |
| Usual care                                                                                                                                                                                                                                                                                                                              | Moderate | Medium          | MBSR (mindfulness based stress reduction) [125] <sup>1</sup> | Some evidence of safety[126] | No data [125]      |
|                                                                                                                                                                                                                                                                                                                                         |          |                 | Tai chi[135] <sup>3,4</sup>                                  | No data[135]                 | No data[135]       |
| NR = not reported (by SRs) <ol style="list-style-type: none"> <li>1. Also some evidence of effectiveness for both in MSK populations.[125 126]</li> <li>2. Nine trials found no adverse events</li> <li>3. Older adults only</li> <li>4. May be less effective in comorbid populations (including some MSK conditions).[133]</li> </ol> |          |                 |                                                              |                              |                    |

### Anxiety

Moderate quality evidence for anxiety (see table 7) was found as follows:

- Meditation, including moving meditation (yoga, tai chi and qi gong): three high-quality reviews,[126 138 139] one prioritised[139]
- MBSR: one high-quality review[125]
- Yoga: three high-quality reviews,[130 136 137] one prioritised[137]

| Comparator          | Quality  | Population size | CAM                               | Safety                            | Cost-effectiveness |
|---------------------|----------|-----------------|-----------------------------------|-----------------------------------|--------------------|
| Active intervention | Moderate | Medium          | Meditation[139]<br><sup>1,2</sup> | Some evidence of safety [126 138] | NR                 |

|                                                                                                                                                                                                                                                                                                                                        |          |        |                        |                                       |    |
|----------------------------------------------------------------------------------------------------------------------------------------------------------------------------------------------------------------------------------------------------------------------------------------------------------------------------------------|----------|--------|------------------------|---------------------------------------|----|
|                                                                                                                                                                                                                                                                                                                                        |          |        |                        | 139]                                  |    |
|                                                                                                                                                                                                                                                                                                                                        | Moderate | Medium | Yoga[137] <sup>3</sup> | No data[136]                          | NR |
| Placebo                                                                                                                                                                                                                                                                                                                                | Moderate | Medium | Meditation[139]<br>1,2 | Some evidence of safety [126 138 139] | NR |
| Usual care                                                                                                                                                                                                                                                                                                                             | Moderate | Medium | Meditation[139]<br>1,2 | Some evidence of safety [126 138 139] | NR |
|                                                                                                                                                                                                                                                                                                                                        | Moderate | Medium | MBSR[125] <sup>2</sup> | Some evidence of safety [126 138 139] | NR |
| <p>NR = not reported (by SRs)</p> <ol style="list-style-type: none"> <li>1. Moving meditation (tai chi, qi gong or yoga) was more effective than static meditation</li> <li>2. MBSR/meditation was also effective for anxiety (as an outcome) in an MSK population.[125 126].</li> <li>3. For women with breast cancer only</li> </ol> |          |        |                        |                                       |    |

### Sleep disorders

Three high-quality reviews considered meditative/mind-body movement for sleep.[144-146] The prioritised review found for older adults, there was moderate quality evidence in a medium sized population, compared to usual care and other active interventions.[144] There was some evidence of safety (no adverse events),[144] and effect on sleep quality in an MSK population.[146] No cost-effectiveness data reported.

### Stress and distress

There was one high-quality review of mindfulness for stress and distress. [125] For stress, they found moderate quality evidence in a medium sized population compared to usual care and placebo, and some evidence of effectiveness on stress as an outcome in an MSK population.[125] No data on cost-effectiveness; no data on safety. For distress they found moderate quality evidence in a medium sized population compared to usual care, and some evidence of effectiveness on distress as an outcome in an MSK population.[125] No data on cost-effectiveness; safety not reported.

There was only poor quality evidence for all other combinations of MH condition/CAM/comparator.

### Evidence for effectiveness in comorbidity /MH outcomes in MSK

Only one SR provided data on comorbid MSK and MH conditions (depression and a variety of comorbid MSK conditions)[133]. Three SRs provided data on MH outcomes in MSK populations (but did not specify a MH score/diagnosis as inclusion criteria). Tai chi for depression and comorbid conditions (including MSKs) may be less effective than for depression alone;[133] MBSR/meditation was effective for MH outcomes (depression, anxiety, stress/distress) in an MSK population;[125 126] meditative/mind-body movement was effective for sleep outcomes in an MSK population.[146]

### CAM with evidence for both MSK and MH conditions

From the above synthesis, CAM with moderate/good quality evidence for both MSK and MH conditions (from separate SRs) are yoga and tai chi. Yoga appears to be effective for both low back pain and anxiety compared to other active interventions, although the anxiety finding was only from studies of women with breast cancer. Meditative movement, which includes yoga, is effective for sleep disorders, although only for older adults (there is also some evidence in chronic pain and fibromyalgia populations). Tai chi appears to be effective compared to usual care for low back pain, knee osteoarthritis and depression, in older people (although it appears less effective in comorbid depressed patients). Meditative movement, which includes tai chi, is effective for sleep disorders, although only for older adults (there is some evidence in chronic pain and fibromyalgia populations as well).

### Update

Since completing this review, in July 2017 we searched for recent SRs on the highest ranking topics (results are not included in tables 3 to 7 above). These either provide additional evidence for MH outcomes in an MSK population, or evidence supporting our original conclusions.

- Yoga: a new Cochrane review for low back pain has been published which suggests there is moderate quality evidence for yoga compared to other active interventions for pain, and for function at 6 months only, although they also found moderate quality evidence of harm for yoga (primarily exacerbation of back pain).[152] They also found very low quality MH evidence for yoga improving depression (as an outcome not a diagnosis) in low back pain (comparator not stated),[152]
- MBSR/mindfulness/meditation: a new SR provides evidence for mindfulness and MH, including high quality evidence (sample size not reported) for mindfulness helping with depression (compared to all controls – usual care, and active interventions (education, stress management); as an outcome not a diagnosis) in low back pain (and fibromyalgia).[153] Another SR of mindfulness for low back pain was recently published but cannot be included as there were no conclusions regarding study quality.[154]
- Acupuncture (compared to other active interventions). Two new SRs confirm the effectiveness of acupuncture for OA knee, with moderate quality evidence in a large sample compared to active interventions and placebo [155 156].

## DISCUSSION

This scoping review has highlighted the large and increasing number of systematic reviews of CAM for MSK and MH disorders, covering 29 different CAM approaches, but identified no high-quality evidence for CAM for MSK-MH comorbid populations. Three reviews showed that MBSR/meditation/meditative movement may improve MH outcomes in MSK populations. Acupuncture, yoga, tai chi and mindfulness/meditation have evidence for both MSK and MH conditions.

We have identified moderate/good quality evidence (as reported by SR authors) for effectiveness (any comparator) in a moderate/large population for : low back pain (yoga, acupuncture, spinal manipulation/mobilisation, osteopathy), osteoarthritis (acupuncture, tai chi), neck pain

1  
2  
3 (acupuncture, manipulation/manual therapy), myofascial trigger point pain (acupuncture),  
4 depression (MBSR, meditation, tai chi, relaxation), anxiety (meditation/MBSR, moving meditation,  
5 yoga), sleep disorders (meditative/mind-body movement), and stress/distress (mindfulness). The  
6 majority of these CAM had some evidence of safety - only three had evidence of harm – osteopathy  
7 for low back pain, acupuncture for osteoarthritis and manipulation/manual therapy for neck pain.  
8 There was some evidence of cost effectiveness for spinal manipulation/mobilisation and  
9 acupuncture for low back pain, and manual therapy/manipulation for neck pain, but few SRs  
10 reviewed cost effectiveness and many found no data.  
11

12 Regarding comorbidity, from our original searches the only evidence for MH outcomes in an MSK  
13 population (not necessarily with MH conditions) was for MBSR/meditation/meditative  
14 movement/mindfulness. Tai chi and yoga were effective for MSK and MH conditions in separate SRs  
15 (not comorbid populations). Our 2017 update found new (but poor quality) evidence for yoga in  
16 MSK-MH comorbidity and more evidence for mindfulness in MSK MH comorbidity.  
17  
18

19 Some of these studies showed effectiveness compared to an active comparator (spinal  
20 manipulation/mobilisation and yoga for low back pain; meditation for depression and anxiety),  
21 providing some evidence that these interventions have effects over and above non-specific  
22 attention.  
23

24 The quality of the SRs was very variable. We used a quality tool, AMSTAR, which itself has some  
25 limitations, as it includes both methodological and reporting items which are not all necessarily  
26 equal in importance, and some of which can be difficult to interpret. Future reviews may consider  
27 prioritising certain items on AMSTAR, using the new version of AMSTAR,<sup>[157]</sup> or using an alternative  
28 critical appraisal tool such as the Oxford Centre for Evidence based medicine checklist  
29 (<https://www.cebm.net/2014/06/critical-appraisal/>). An assessment of risk-of-bias, using for  
30 example ROBIS, may be useful in addition to these quality assessments.  
31

32 The quality of included trials also varied greatly; it is notable that none of the MH SRs concluded that  
33 trial quality was ‘good’ overall. In addition, assessment of individual RCT study quality is likely to  
34 have varied between SR authors, a common issue with CAM studies which rarely fit conventional  
35 quality criteria (particularly blinding). Very few of the MSK SRs and none of the mental health SRs  
36 mentioned cost-effectiveness. Safety was rarely adequately reported in SRs or the studies they  
37 included. Future systematic reviews in the areas of CAM and MSK/MH need to ensure they include *a*  
38 *priori* design/protocol registration, a list of excluded studies, and conflict of interest statements, and  
39 use duplicate study selection and data extraction, assess publication bias, and search for grey  
40 literature.  
41  
42

43 Both a strength and limitation of this scoping review was its comprehensive scope which included a  
44 wide range of CAM approaches and types of MSK and MH condition, but limited the depth of  
45 analysis and discussion.  
46

47 Other key strengths were the systematic searching techniques, prioritising high-quality SRs using  
48 MeSH terms where possible, and search techniques to capture grey and unpublished literature. The  
49 whole project team were involved in independently screening the literature search results, although  
50 a limitation was that only one author conducted data extraction. We included a quality appraisal of  
51 the reviews, although time constraints meant this was an abbreviated assessment. One of the key  
52 limitations was the pragmatic decision to only include systematic reviews, which may have led to the  
53 exclusion of some CAMs, and means results are subject to the limitations of systematic review and  
54 trial methodology, study designs which are sometimes challenging for CAM.<sup>[158-160]</sup> Another key  
55  
56  
57  
58  
59



1  
2  
3 limitation is our definition of CAM as including a practitioner in its delivery (which relied on review  
4 authors reporting these details), which excluded over the counter products or self-care practices,  
5 herbal medicine in particular, but was necessary to limit the scope of the review to CAM which may  
6 be appropriate for an integrated care model using referral from a GP. We are aware that by  
7 excluding reviews published pre-2005 we may have excluded some topics. We were unable to  
8 include non-English publications.  
9

10 Although CAM is commonly used by patients in the UK,[25] it is not widely available via the NHS.  
11 Given the high burden of MSK and MH conditions to individuals and society in the UK, and the  
12 prevalence of comorbidity, CAM may be worth considering for some patients, where there is  
13 evidence of effectiveness, cost-effectiveness and safety.  
14

15 One of the main aims of this study was to inform the design of a future trial to assess the  
16 effectiveness and cost effectiveness of an integrated medicine (IM) approach for patients with  
17 comorbid musculoskeletal and mental health disorders. We will combine the results of this review  
18 with the views of conventional and CAM practitioners, the public and NHS providers, to inform the  
19 final focus for an RCT. Our proposed trial would be pragmatic and focus on overall effectiveness, so  
20 interventions with evidence compared to any comparator are potential candidates.  
21  
22

23 Systematic reviews of CAMs consistently conclude that further high quality trials are needed, with  
24 longer follow up and larger sample sizes, assessing cost-effectiveness and use of appropriate,  
25 sensitive, validated outcome measures.  
26

27 Based on our criteria of study quality, safety, cost-effectiveness, and evidence for MSK MH  
28 comorbidity, this scoping review suggests that the most promising CAM for future research in the  
29 area of MH-MSK comorbidity are: mindfulness (evidence for MH in MSK populations and evidence of  
30 safety), yoga (evidence for MSK and MH conditions), and tai chi (evidence for MSK and MH  
31 conditions, evidence of safety). The comorbid populations that would benefit most are less clear, as  
32 so few reviews focus on comorbidity, but may include low back pain, osteoarthritis, and depression,  
33 anxiety and sleep.  
34  
35  
36  
37

## 38 Funding

39  
40 The report is based on independent research commissioned and funded by the NIHR Policy Research  
41 Programme (*The Effectiveness And Cost Effectiveness Of Complementary And Alternative Medicine (Cam) For*  
42 *Multimorbid Patients With Mental Health And Musculoskeletal Problems In Primary Care In The UK: A Scoping*  
43 *Study*). The views expressed in the publication are those of the author(s) and not necessarily those of  
44 the NHS, the NIHR, the Department of Health, 'arms' length bodies or other government  
45 departments.  
46  
47  
48

## 49 Competing interests

50  
51 No competing interests to declare  
52  
53

## 54 Acknowledgements

55  
56  
57  
58  
59  
60

1  
2  
3 We are grateful to Catherine Borwick for her help with literature searching and Sandra Hollinghurst  
4 for her help with screening the papers. We are also very grateful to our PPI group.  
5

## 6 **Contributions**

7  
8 AL conducted all literature searches, data extraction and quality appraisal, with the project team  
9 (GF, HM, PL, SM and DS) all screening papers for inclusion. The team (GF, HM, PL, SM and DS) all  
10 provided input into the inclusion/exclusion criteria. DS advised on the review process. GF, HM, PL,  
11 SM and DS were all involved in the prioritisation of topics from the review results. AL drafted the  
12 paper and all authors reviewed and edited it.  
13

## 14 **Data sharing**

15  
16 We are able to provide copies of searches and lists of excluded references on request.  
17  
18  
19  
20  
21  
22  
23  
24  
25  
26  
27  
28  
29  
30  
31  
32  
33  
34  
35  
36  
37  
38  
39  
40  
41  
42  
43  
44  
45  
46  
47  
48  
49  
50  
51  
52  
53  
54  
55  
56  
57  
58  
59  
60

## References

1. Murray CJ, Richards MA, Newton JN, et al. UK health performance: findings of the Global Burden of Disease Study 2010. *Lancet* 2013;**381**(9871):997-1020 doi: 10.1016/S0140-6736(13)60355-4[published Online First: Epub Date]].
2. H. D. The Musculoskeletal Services Framework Y1. Secondary The Musculoskeletal Services Framework Y1 2006. [http://webarchive.nationalarchives.gov.uk/20130107105354/http://www.dh.gov.uk/prod\\_consum\\_dh/groups/dh\\_digitalassets/@dh/@en/documents/digitalasset/dh\\_4138412.pdf](http://webarchive.nationalarchives.gov.uk/20130107105354/http://www.dh.gov.uk/prod_consum_dh/groups/dh_digitalassets/@dh/@en/documents/digitalasset/dh_4138412.pdf).
3. Centre HSCI. Adult psychiatric morbidity in England, 2007: Results of a household survey. In: Sally McManus HM, Traolach Brugha, Paul Bebbington, Rachel Jenkins, ed., 2009.
4. Halliwell E, Main L, Richardson C. The Fundamental Facts. Secondary The Fundamental Facts 2007. [http://www.mentalhealth.org.uk/content/assets/PDF/publications/fundamental\\_facts\\_2007.pdf?view=Standard](http://www.mentalhealth.org.uk/content/assets/PDF/publications/fundamental_facts_2007.pdf?view=Standard).
5. World Health Organization. Chronic diseases and health promotion: chronic rheumatic conditions. Secondary Chronic diseases and health promotion: chronic rheumatic conditions 2013. <http://www.who.int/chp/topics/rheumatic/en/>.
6. Health and Safety Executive. Annual Statistics Report 2011-12. Secondary Annual Statistics Report 2011-12 2012. <http://www.hse.gov.uk/statistics/overall/hssh1112.pdf>.
7. HM Government. No Health Without Mental Health: A cross-government mental health outcomes strategy for people of all ages. Secondary No Health Without Mental Health: A cross-government mental health outcomes strategy for people of all ages 2011. [https://www.gov.uk/government/uploads/system/uploads/attachment\\_data/file/213761/dh\\_124058.pdf](https://www.gov.uk/government/uploads/system/uploads/attachment_data/file/213761/dh_124058.pdf).
8. Dionne CE, Dunn KM, Croft PR. Does back pain prevalence really decrease with increasing age? A systematic review. *Age Ageing* 2006;**35**(3):229-34 doi: 10.1093/ageing/afj055[published Online First: Epub Date]].
9. Jeffries LJ, Milanese SF, Grimmer-Somers KA. Epidemiology of adolescent spinal pain: a systematic overview of the research literature. *Spine* 2007;**32**(23):2630-7 doi: 10.1097/BRS.0b013e318158d70b[published Online First: Epub Date]].
10. Hoy D, Bain C, Williams G, et al. A systematic review of the global prevalence of low back pain. *Arthritis Rheum* 2012;**64**(6):2028-37 doi: 10.1002/art.34347[published Online First: Epub Date]].
11. Maniadakis N, Gray A. The economic burden of back pain in the UK. *Pain* 2000;**84**(1):95-103
12. National Institute for Health and Clinical Excellence. Low back pain final scope. Secondary Low back pain final scope 2007. <https://www.nice.org.uk/guidance/cg88/documents/low-back-pain-final-scope2>.
13. Arthritis Research UK. Osteoarthritis in general practice. Secondary Osteoarthritis in general practice 2013. [http://www.arthritisresearchuk.org/~media/Files/Policy%20files/Policy%20pages%20files/Keele\\_Data\\_Report\\_digital\\_output.ashx?la=en](http://www.arthritisresearchuk.org/~media/Files/Policy%20files/Policy%20pages%20files/Keele_Data_Report_digital_output.ashx?la=en).
14. Oxford Economics. The economic costs of arthritis for the UK economy. Secondary The economic costs of arthritis for the UK economy 2010. <http://www.oxfordeconomics.com/my-oxford/projects/128882>.
15. Centre HSCI. Health Survey for England 2014: Health, social care and lifestyles - Summary of key findings. Secondary Health Survey for England 2014: Health, social care and lifestyles - Summary of key findings 2014. <http://www.hscic.gov.uk/catalogue/PUB19295/HSE2014-Sum-bklet.pdf>.
16. Ohayon MM. Epidemiology of insomnia: what we know and what we still need to learn. *Sleep Med Rev* 2002;**6**(2):97-111

17. Salisbury C, Johnson L, Purdy S, Valderas JM, Montgomery AA. Epidemiology and impact of multimorbidity in primary care: a retrospective cohort study. *Br J Gen Pract* 2011;**61**(582):e12-21 doi: 10.3399/bjgp11X548929[published Online First: Epub Date]].
18. Violan C, Foguet-Boreu Q, Flores-Mateo G, et al. Prevalence, determinants and patterns of multimorbidity in primary care: a systematic review of observational studies. *PLoS One* 2014;**9**(7):e102149 doi: 10.1371/journal.pone.0102149[published Online First: Epub Date]].
19. Mercer S, Salisbury C, Fortin M. *ABC of Multimorbidity*: John Wiley & Sons, 2014.
20. Barnett K, Mercer SW, Norbury M, Watt G, Wyke S, Guthrie B. Epidemiology of multimorbidity and implications for health care, research, and medical education: a cross-sectional study. *Lancet* 2012;**380**(9836):37-43 doi: 10.1016/S0140-6736(12)60240-2[published Online First: Epub Date]].
21. Katona C, Peveler R, Dowrick C, et al. Pain symptoms in depression: definition and clinical significance. *Clin Med (Lond)* 2005;**5**(4):390-5
22. Fisher P. Connecting with the Strategic Agenda: integrated medicine, polypharmacy, antimicrobial resistance and multimorbidity *CAMSTRAND 2015;CAMSTRAND*
23. The House of Lords. What is Complementary and Alternative Medicine? Growing Use of CAM in the United Kingdom Science and Technology - Sixth Report 2000
24. Eardley S, Bishop FL, Prescott P, et al. A systematic literature review of complementary and alternative medicine prevalence in EU. *Forsch Komplementmed* 2012;**19 Suppl 2**:18-28 doi: 10.1159/000342708[published Online First: Epub Date]].
25. Hunt KJ, Coelho HF, Wider B, et al. Complementary and alternative medicine use in England: results from a national survey. *Int J Clin Pract* 2010;**64**(11):1496-502 doi: 10.1111/j.1742-1241.2010.02484.x[published Online First: Epub Date]].
26. Wye L, Shaw A, Sharp D. Designing a 'NHS friendly' complementary therapy service: A qualitative case study. *BMC Health Serv Res* 2008;**8**(1):173
27. Fisher P, van Haselen R, Hardy K, Berkovitz S, McCarney R. Effectiveness gaps: a new concept for evaluating health service and research needs applied to complementary and alternative medicine. *J Altern Complement Med* 2004;**10**(4):627-32 doi: 10.1089/acm.2004.10.627[published Online First: Epub Date]].
28. Unwin J, Peters D. Gatekeepers and the Gateway--a mixed-methods inquiry into practitioners' referral behaviour to the Gateway Clinic. *Acupuncture in medicine : journal of the British Medical Acupuncture Society* 2009;**27**(1):21-5 doi: 10.1136/aim.2008.000083[published Online First: Epub Date]].
29. Kessler RC, Soukup J, Davis RB, et al. The use of complementary and alternative therapies to treat anxiety and depression in the United States. *American Journal of Psychiatry* 2001;**158**(2):289-94 doi: 10.1176/appi.ajp.158.2.289[published Online First: Epub Date]].
30. Mamtani R, Cimino A. A Primer of Complementary and Alternative Medicine and Its Relevance in the Treatment of Mental Health Problems. *Psychiatr Q* 2002;**73**(4):367-81 doi: 10.1023/A:1020472218839[published Online First: Epub Date]].
31. Eardley S, Bishop FL, Prescott P, et al. A Systematic Literature Review of Complementary and Alternative Medicine Prevalence in EU. *Forschende Komplementärmedizin / Research in Complementary Medicine* 2012;**19(suppl 2)**(Suppl. 2):18-28
32. Artus M, Croft M, Lewis M. The use of CAM and conventional treatments among primary care consultants with chronic musculoskeletal pain. *BMC Family Practice* 2007;**8**:26 doi: 10.1186/1471-2296-8-26[published Online First: Epub Date]].
33. Arksey H, O'Malley L. Scoping studies: towards a methodological framework. *International Journal of Social Research Methodology* 2005;**8**(1):19-32 doi: 10.1080/1364557032000119616[published Online First: Epub Date]].
34. Mays N, Roberts E, Popay E. Chapter 12: Synthesising research evidence In: *Methods for studying the delivery and organisation of health services*. London : Routledge 2001:188-220

- 1  
2  
3 35. Levac D, Colquhoun H, O'Brien KK. Scoping studies: advancing the methodology. *Implementation science* : IS 2010;**5**:69 doi: 10.1186/1748-5908-5-69[published Online First: Epub Date]].
- 4 36. Daudt HM, van Mossel C, Scott S. Enhancing the scoping study methodology: a large, inter-  
5 professional team's experience with Arksey and O'Malley's framework. *BMC Medical*  
6 *Research Methodology* 2013;**13**(1):48
- 7 37. Colquhoun HL, Levac D, O'Brien KK, et al. Scoping reviews: time for clarity in definition, methods,  
8 and reporting. *J Clin Epidemiol* 2014;**67**(12):1291-4 doi:  
9 10.1016/j.jclinepi.2014.03.013[published Online First: Epub Date]].
- 10 38. Pham MT, Rajić A, Greig JD, Sargeant JM, Papadopoulos A, McEwen SA. A scoping review of  
11 scoping reviews: advancing the approach and enhancing the consistency. *Research Synthesis*  
12 *Methods* 2014;**5**(4):371-85 doi: 10.1002/jrsm.1123[published Online First: Epub Date]].
- 13 39. Shea BJ, Hamel C, Wells GA, et al. AMSTAR is a reliable and valid measurement tool to assess the  
14 methodological quality of systematic reviews. *Journal of Clinical Epidemiology*  
15 2009;**62**(10):1013-20 doi: <http://dx.doi.org/10.1016/j.jclinepi.2008.10.009>[published  
16 Online First: Epub Date]].
- 17 40. Moher D, Liberati A, Tetzlaff J, Altman DG. Preferred reporting items for systematic reviews and  
18 meta-analyses: the PRISMA statement. *BMJ* 2009;**339**:b2535
- 19 41. Furlan A, Yazdi F, Tsertsvadze A, et al. Complementary and alternative therapies for back pain II.  
20 Evidence report/technology assessment 2010(194):1-764
- 21 42. Rubinstein S, Van MM, Kuijpers T, et al. A systematic review on the effectiveness of  
22 complementary and alternative medicine for chronic non-specific low-back pain. *European*  
23 *Spine Journal* 2010;**19**(8):1213-28.
- 24 43. Dagenais S, Gay RE, Tricco AC, Freeman MD, Mayer JM. NASS Contemporary Concepts in Spine  
25 Care: spinal manipulation therapy for acute low back pain. *Spine Journal: Official Journal of*  
26 *the North American Spine Society* 2010;**10**(10):918-40
- 27 44. Rubinstein SM, van Middelkoop M, Assendelft WJ, de Boer MR, van Tulder MW. Spinal  
28 manipulative therapy for chronic low-back pain: an update of a Cochrane review. *Spine*  
29 2011;**36**(13):E825-46
- 30 45. Rubinstein Sidney M, Terwee Caroline B, Assendelft Willem JJ, de Boer Michiel R, van Tulder  
31 Maurits W. Spinal manipulative therapy for acute low-back pain. *Cochrane Database of*  
32 *Systematic Reviews* 2012; (9).  
33 <http://onlinelibrary.wiley.com/doi/10.1002/14651858.CD008880.pub2/abstract>  
34 <http://onlinelibrary.wiley.com/store/10.1002/14651858.CD008880.pub2/asset/CD008880.pdf?v=1&t=ib3gswom&s=eb7eca6d9e95c55fc4a56961d5c3271ba098cc42>.
- 35 46. Merepeza A. Effects of spinal manipulation versus therapeutic exercise on adults with chronic  
36 low back pain: a literature review. *Journal of the Canadian Chiropractic Association*  
37 2014;**58**(4):456-66
- 38 47. Hidalgo B, Detrembleur C, Hall T, Mahaudens P, Nielens H. The efficacy of manual therapy and  
39 exercise for different stages of non-specific low back pain: an update of systematic reviews.  
40 *Journal of Manual & Manipulative Therapy (Maney Publishing)* 2014;**22**(2):59-74 doi:  
41 10.1179/2042618613Y.0000000041[published Online First: Epub Date]].
- 42 48. Tsertsvadze A, Clar C, Court R, Clarke A, Mistry H, Sutcliffe P. COST-EFFECTIVENESS OF MANUAL  
43 THERAPY FOR THE MANAGEMENT OF MUSCULOSKELETAL CONDITIONS: A SYSTEMATIC  
44 REVIEW AND NARRATIVE SYNTHESIS OF EVIDENCE FROM RANDOMIZED CONTROLLED  
45 TRIALS. *Journal of Manipulative & Physiological Therapeutics* 2014;**37**(6):343-62 doi:  
46 10.1016/j.jmpt.2014.05.001[published Online First: Epub Date]].
- 47 49. Franke H, Fryer G, Ostelo RW, Kamper SJ. Muscle energy technique for non-specific low-back  
48 pain. *Cochrane Database Syst Rev* 2015;**2**:CD009852 doi:  
49 10.1002/14651858.CD009852.pub2[published Online First: Epub Date]].
- 50  
51  
52  
53  
54  
55  
56  
57  
58  
59

- 1  
2  
3 50. Manheimer E, White A, Berman B, Forys K, Ernst E. Meta-analysis: acupuncture for low back pain  
4 [corrected] [published erratum appears in ANN INTERN MED 2005 Jun 7;142(11):950-1; ANN  
5 INTERN MED 2005;143(9):695]. *Annals of Internal Medicine* 2005;**142**(8):651
- 6 51. Xu M, Yan S, Yin X, et al. Acupuncture for chronic low back pain in long-term follow-up: a meta-  
7 analysis of 13 randomized controlled trials. *American Journal of Chinese Medicine*  
8 2013;**41**(1):1-19
- 9 52. Holtzman S, Beggs R. Yoga for chronic low back pain: A meta-analysis of randomized controlled  
10 trials. *Pain Research & Management* 2013;**18**(5):267-72
- 11 53. Pittler MH, Karagülle MZ, Karagülle M, Ernst E. Spa therapy and balneotherapy for treating low  
12 back pain: meta-analysis of randomized trials. *Rheumatology (Oxford, England)*  
13 2006;**45**(7):880-4 doi: 10.1093/rheumatology/kei018[published Online First: Epub Date]].
- 14 54. Furlan AD, van Tulder M, Cherkin D, et al. Acupuncture and dry-needling for low back pain: an  
15 updated systematic review within the framework of the cochrane collaboration. *Spine*  
16 2005;**30**(8):944-63
- 17 55. Yuan QL, Guo TM, Liu L, Sun F, Zhang YG. Traditional Chinese Medicine for Neck Pain and Low  
18 Back Pain: A Systematic Review and Meta-Analysis. *PloS one* 2015;**10**(2):e0117146 doi:  
19 10.1371/journal.pone.0117146[published Online First: Epub Date]].
- 20 56. Posadzki P, Lizis P, Hagner-Derengowska M. Pilates for low back pain: a systematic review.  
21 *Complementary Therapies in Clinical Practice* 2011;**17**(2):85-9
- 22 57. Lim EC, Poh RL, Low AY, Wong WP. Effects of Pilates-based exercises on pain and disability in  
23 individuals with persistent nonspecific low back pain: a systematic review with meta-  
24 analysis. *Journal of Orthopaedic & Sports Physical Therapy* 2011;**41**(2):70-80
- 25 58. Miyamoto GC, Costa LO, Cabral CM. Efficacy of the Pilates method for pain and disability in  
26 patients with chronic nonspecific low back pain: a systematic review with meta-analysis.  
27 *Brazilian Journal of Physical Therapy* 2013;**17**(6):517-32
- 28 59. Aladro-Gonzalvo AR, Araya-Vargas GA, Machado-Diaz M, Salazar-Rojas W. Pilates-based exercise  
29 for persistent, non-specific low back pain and associated functional disability: a meta-  
30 analysis with meta-regression. *Journal of Bodywork & Movement Therapies* 2013;**17**(1):125-  
31 36
- 32 60. Yamato TMC SBHMORCCMCLCL. Pilates for low back pain. *Cochrane Database of Systematic*  
33 *Reviews* 2015(7):No.: CD010265. DOI: 10.1002/14651858.CD010265.pub2
- 34 61. Posadzki P, Ernst E. Yoga for low back pain: a systematic review of randomized clinical trials.  
35 *Clinical Rheumatology* 2011;**30**(9):1257-62
- 36 62. Ward L, Stebbings S, Cherkin D, Baxter GD. Yoga for functional ability, pain and psychosocial  
37 outcomes in musculoskeletal conditions: a systematic review and meta-analysis.  
38 *Musculoskeletal Care* 2013;**11**(4):203-17
- 39 63. Cramer H, Lauche R, Haller H, Dobos G. A systematic review and meta-analysis of yoga for low  
40 back pain. *Clinical Journal of Pain* 2013;**29**(5):450-60
- 41 64. Furlan Andrea D, Giraldo M, Baskwill A, Imamura M. Massage for low-back pain. *Cochrane*  
42 *Database of Systematic Reviews* 2015(9):Art. No.: CD001929. DOI:  
43 10.1002/14651858.CD001929.pub3.
- 44 65. Orrock PJ, Myers SP. Osteopathic intervention in chronic non-specific low back pain: a systematic  
45 review. *BMC Musculoskeletal Disorders* 2013;**14**:129
- 46 66. Franke H, Franke JD, Fryer G. Osteopathic manipulative treatment for nonspecific low back pain:  
47 a systematic review and meta-analysis. *BMC Musculoskeletal Disorders* 2014;**15**:286
- 48 67. Kim YC, Lee MS, Park ES, Lew JH, Lee BJ. Acupressure for the treatment of musculoskeletal pain  
49 conditions: A systematic review. *Journal of Musculoskeletal Pain* 2012;**20**(2):116-21
- 50 68. Hu X-yC, Ni-ni; Chai,Qian-yun; Yang, Guo-yan; Trevelyan, Esme; Lorenc, Ava; Liu, Jian-ping;  
51 Robinson, Nicola. Integrative Treatment for Low Back Pain: An Exploratory Systematic  
52 Review and Meta-Analysis of Randomized Controlled Trials. *Chin J Integr Med*  
53 2015;**Accepted for publication**
- 54  
55  
56  
57  
58  
59  
60



- 1
- 2
- 3 69. Kizhakkeveettil A, Rose K, Kadar GE. Integrative therapies for low back pain that include
- 4 complementary and alternative medicine care: A systematic review. *Global Advances In*
- 5 *Health and Medicine* 2014;**3**(5):49-64
- 6 70. Walker BF, French SD, Grant W, Green S. Combined chiropractic interventions for low-back pain.
- 7 *Cochrane Database of Systematic Reviews* 2010:N.PAG
- 8 71. Langhorst J, Klose P, Musial F, Irnich D, Hauser W. Efficacy of acupuncture in fibromyalgia
- 9 syndrome--a systematic review with a meta-analysis of controlled clinical trials.
- 10 *Rheumatology* 2010;**49**(4):778-88
- 11 72. Cao H, Liu J, Lewith G. Traditional Chinese Medicine for treatment of fibromyalgia: a systematic
- 12 review of randomized controlled trials. *Journal of Alternative & Complementary Medicine -*
- 13 *New York* 2010;**16**(4):397-409.
- 14 73. Deare JC, Zheng Z, Xue CC, et al. Acupuncture for treating fibromyalgia. *Cochrane Database of*
- 15 *Systematic Reviews* 2013;**5**:CD007070
- 16 74. Bai Y, Guo Y, Wang H, et al. Efficacy of acupuncture on fibromyalgia syndrome: A Meta-analysis.
- 17 *Journal of Traditional Chinese Medicine* 2014;**34**(4):381-91
- 18 75. Porter N, Jason L, Boulton A, Bothne N, Coleman B. Alternative medical interventions used in the
- 19 treatment and management of myalgic encephalomyelitis/chronic fatigue syndrome and
- 20 fibromyalgia. *Journal of Alternative & Complementary Medicine - New York* 2010;**16**(3):235-
- 21 49.
- 22 76. Li YH, Wang FY, Feng CQ, Yang XF, Sun YH. Massage therapy for fibromyalgia: a systematic review
- 23 and meta-analysis of randomized controlled trials. *PLoS ONE [Electronic Resource]*
- 24 2014;**9**(2):e89304
- 25 77. Yuan SLK, Matsutani LA, Marques AP. Effectiveness of different styles of massage therapy in
- 26 fibromyalgia: A systematic review and meta-analysis. *Manual Therapy* 2015;**20**(2):257-64
- 27 doi: 10.1016/j.math.2014.09.003[published Online First: Epub Date]].
- 28 78. Lauche R, Cramer H, Dobos G, Langhorst J, Schmidt S. A systematic review and meta-analysis of
- 29 mindfulness-based stress reduction for the fibromyalgia syndrome. *Journal of Psychosomatic*
- 30 *Research* 2013;**75**(6):500-10
- 31 79. Theadom A, Cropley M, Smith HE, Feigin VL, McPherson K. Mind and body therapy for
- 32 fibromyalgia. *The Cochrane database of systematic reviews* 2015;**4**:Cd001980 doi:
- 33 10.1002/14651858.CD001980.pub3[published Online First: Epub Date]].
- 34 80. Bernardy K, Fuber N, Klose P, Hauser W. Efficacy of hypnosis/guided imagery in fibromyalgia
- 35 syndrome--a systematic review and meta-analysis of controlled trials. *BMC Musculoskeletal*
- 36 *Disorders* 2011;**12**:133
- 37 81. Mist SD, Firestone KA, Jones KD. Complementary and alternative exercise for fibromyalgia: a
- 38 meta-analysis. *Journal of pain research* 2013;**6**:247-60 doi: 10.2147/JPR.S32297[published
- 39 Online First: Epub Date]].
- 40 82. Cao H, Li X, Han M, Liu J. Acupoint stimulation for fibromyalgia: A systematic review of
- 41 randomized controlled trials. *Evidence-based Complementary and Alternative Medicine*
- 42 2013;**2013**(362831): doi: 10.1155/2013/362831
- 43 83. Gross A, Langevin P, Burnie SJ, et al. Manipulation and mobilisation for neck pain contrasted
- 44 against an inactive control or another active treatment. *Cochrane Database of Systematic*
- 45 *Reviews* 2015(9) doi: 10.1002/14651858.CD004249.pub4[published Online First: Epub
- 46 Date]].
- 47 84. Carlesso LC, Gross AR, Santaguida PL, Burnie S, Voth S, Sadi J. Adverse events associated with the
- 48 use of cervical manipulation and mobilization for the treatment of neck pain in adults: a
- 49 systematic review. *Manual Therapy* 2010;**15**(5):434-44
- 50 85. Lin JH, Chiu TT, Hu J. Chinese manipulation for mechanical neck pain: a systematic review. *Clinical*
- 51 *Rehabilitation* 2012;**26**(11):963-73
- 52 86. Huisman PA, Speksnijder CM, de Wijer A. The effect of thoracic spine manipulation on pain and
- 53 disability in patients with non-specific neck pain: a systematic review. *Disability &*
- 54
- 55
- 56
- 57
- 58
- 59
- 60



- 1  
2  
3 Rehabilitation 2013;**35**(20):1677-85 doi: 10.3109/09638288.2012.750689[published Online  
4 First: Epub Date]].
- 5 87. Boyles R, Toy P, Mellon Jr J, Hayes M, Hammer B. Effectiveness of manual physical therapy in the  
6 treatment of cervical radiculopathy: A systematic review. *Journal of Manual and*  
7 *Manipulative Therapy* 2011;**19**(3):135-42
- 8 88. Miller J, Gross A, D'Sylva J, et al. Manual therapy and exercise for neck pain: a systematic review.  
9 *Manual Therapy* 2010;**15**(4):334-54
- 10 89. D'Sylva J, Miller J, Gross A, et al. Manual therapy with or without physical medicine modalities for  
11 neck pain: a systematic review. *Manual Therapy* 2010;**15**(5):415-33 doi:  
12 10.1016/j.math.2010.04.003[published Online First: Epub Date]].
- 13 90. Trinh K, Graham N, Gross A, et al. Acupuncture for neck disorders. *Cochrane Database of*  
14 *Systematic Reviews* 2006:N.PAG
- 15 91. Patel KC, Gross A, Graham N, et al. Massage for mechanical neck disorders. *Cochrane Database*  
16 *of Systematic Reviews* 2012;**9**:CD004871
- 17 92. White A, Foster NE, Cummings M, Barlas P. Acupuncture treatment for chronic knee pain: a  
18 systematic review. *Rheumatology* 2007;**46**(3):384-90
- 19 93. Manheimer E, Cheng K, Linde K, et al. Acupuncture for peripheral joint osteoarthritis. *Cochrane*  
20 *Database of Systematic Reviews* 2010(1):CD001977
- 21 94. Cao L, Zhang XL, Gao YS, Jiang Y. Needle acupuncture for osteoarthritis of the knee. A systematic  
22 review and updated meta-analysis. *Saudi Medical Journal* 2012;**33**(5):526-32
- 23 95. Corbett M, Rice S, Madurasinghe V, et al. Acupuncture and other physical treatments for the  
24 relief of pain due to osteoarthritis of the knee: Network meta-analysis. *Osteoarthritis and*  
25 *Cartilage* 2013;**21**(9):1290-8.
- 26 96. Turner K, Igo S. Efficacy of acupuncture in the treatment of osteoarthritis of the knee joint.  
27 *Journal - Acupuncture Association of Chartered Physiotherapists* 2013;**2013**(1):21-39.
- 28 97. Manyanga T, Froese M, Zarychanski R, et al. Pain management with acupuncture in  
29 osteoarthritis: a systematic review and meta-analysis. *BMC Complementary & Alternative*  
30 *Medicine* 2014;**14**:312
- 31 98. Hall A, Maher C, Latimer J, Ferreira M. The effectiveness of Tai Chi for chronic musculoskeletal  
32 pain conditions: a systematic review and meta-analysis. *Arthritis & Rheumatism*  
33 2009;**61**(6):717-24
- 34 99. Kang JW, Lee MS, Posadzki P, Ernst E. T'ai chi for the treatment of osteoarthritis: a systematic  
35 review and meta-analysis. *BMJ Open* 2011;**1**(1) doi: 10.1136/bmjopen-2010-  
36 000035[published Online First: Epub Date]].
- 37 100. Lauche R, Langhorst J, Dobos G, Cramer H. A systematic review and meta-analysis of Tai Chi for  
38 osteoarthritis of the knee. *Complementary Therapies in Medicine* 2013;**21**(4):396-406
- 39 101. Yan JH, Gu WJ, Sun J, Zhang WX, Li BW, Pan L. Efficacy of Tai Chi on pain, stiffness and function  
40 in patients with osteoarthritis: a meta-analysis. *PLoS ONE [Electronic Resource]*  
41 2013;**8**(4):e61672
- 42 102. Mat S, Tan MP, Kamaruzzaman SB, Ng CT. Physical therapies for improving balance and  
43 reducing falls risk in osteoarthritis of the knee: a systematic review. *Age Ageing*  
44 2015;**44**(1):16-24 doi: 10.1093/ageing/afu112[published Online First: Epub Date]].
- 45 103. Casimiro L, Barnsley L, Brosseau L, et al. Acupuncture and electroacupuncture for the treatment  
46 of rheumatoid arthritis. *Cochrane Database of Systematic Reviews* 2005(4):CD003788
- 47 104. Lee M, Shin B, Ernst E. Acupuncture for rheumatoid arthritis: a systematic review.  
48 *Rheumatology* 2008;**47**(12):1747-53.
- 49 105. Sun ZL, Xu X, Du SZ, Jiang X. Moxibustion for treating rheumatoid arthritis: A systematic review  
50 and meta-analysis of randomized controlled trials. *European Journal of Integrative Medicine*  
51 2014;**6**(6):621-30
- 52  
53  
54  
55  
56  
57  
58  
59  
60

106. Verhagen AP, Bierma-Zeinstra SM, Boers M, et al. Balneotherapy (or spa therapy) for rheumatoid arthritis. The Cochrane database of systematic reviews 2015;**4**:CD000518 doi: 10.1002/14651858.CD000518.pub2[published Online First: Epub Date]].
107. Law D, McDonough S, Bleakley C, Baxter GD, Tumilty S. Laser Acupuncture for Treating Musculoskeletal Pain: A Systematic Review with Meta-analysis. JAMS Journal of Acupuncture and Meridian Studies 2015;**8**(1):2-16
108. Zhao H-J, Tan J-Y, Wang T, Jin L. Auricular therapy for chronic pain management in adults: A synthesis of evidence. Complementary Therapies in Clinical Practice 2015;**21**(2):68-78 doi: 10.1016/j.ctcp.2015.03.006[published Online First: Epub Date]].
109. Wong Lit Wan D, Wang Y, Xue CC, Wang LP, Liang FR, Zheng Z. Local and distant acupuncture points stimulation for chronic musculoskeletal pain: A systematic review on the comparative effects. Eur J Pain 2015;**19**(9):1232-47 doi: 10.1002/ejp.671[published Online First: Epub Date]].
110. Song Y, Lu H, Chen H, Geng G, Wang J. Mindfulness intervention in the management of chronic pain and psychological comorbidity: A meta-analysis. International Journal of Nursing Sciences 2014;**1**(2):215-23
111. Bawa FL, Mercer SW, Atherton RJ, et al. Does mindfulness improve outcomes in patients with chronic pain? Systematic review and meta-analysis. The British journal of general practice : the journal of the Royal College of General Practitioners 2015;**65**(635):e387-400 doi: 10.3399/bjgp15X685297[published Online First: Epub Date]].
112. Braun C, Hanchard NCA. Manual therapy and exercise for impingement-related shoulder pain. Physical Therapy Reviews 2010;**15**(2):62-83 doi: 10.1179/174328810X12786297204675[published Online First: Epub Date]].
113. Page Matthew J, Green S, Kramer S, et al. Manual therapy and exercise for adhesive capsulitis (frozen shoulder). Cochrane Database of Systematic Reviews 2014(8):CD011275 doi: 10.1002/14651858.CD011275[published Online First: Epub Date]].
114. Clar C, Tsertsvadze A, Court R, Hundt GL, Clarke A, Sutcliffe P. Clinical effectiveness of manual therapy for the management of musculoskeletal and non-musculoskeletal conditions: Systematic review and update of UK evidence report. Chiropractic and Manual Therapies 2014;**22**:12
115. Desjardins-Charbonneau A, Roy JS, Dionne CE, Fremont P, MacDermid JC, Desmeules F. The efficacy of manual therapy for rotator cuff tendinopathy: a systematic review and meta-analysis. J Orthop Sports Phys Ther 2015;**45**(5):330-50 doi: 10.2519/jospt.2015.5455[published Online First: Epub Date]].
116. Green S, Buchbinder R, Hetrick S. Acupuncture for shoulder pain. Cochrane Database of Systematic Reviews 2005(2):CD005319
117. Tough EA, White AR, Cummings T, Richards SH, Campbell JL. Acupuncture and dry needling in the management of myofascial trigger point pain: A systematic review and meta-analysis of randomised controlled trials. European Journal of Pain 2009;**13**(1):3-10
118. Liu L, Huang QM, Liu QG, et al. Effectiveness of dry needling for myofascial trigger points associated with neck and shoulder pain: A systematic review and meta-analysis. Archives of Physical Medicine and Rehabilitation 2015;**96**(5):944-55
119. Clark RJ, Tighe M. The effectiveness of acupuncture for plantar heel pain: a systematic review. Acupuncture in Medicine 2012;**30**(4):298-306
120. Qin ZL, Xiaoxu; Wu, Jiani; Zhai, Yanbing; Liu, Zhishun. Acupuncture for sciatica: a systematic review. 2015
121. Bisset L, Hing W, Vicenzino B. A systematic review of the efficacy of MWM. In: Bill Vicenzino WH, Darren Rivett, Toby Hall, ed. Mobilisation with Movement: The Art and Science. Australia: Elsevier 2011:26-63.

- 1  
2  
3 122. Tang H, Fan H, Chen J, et al. Acupuncture for Lateral Epicondylitis: A Systematic Review. *Evid*  
4 *Based Complement Alternat Med* 2015;**2015**:861849 doi: 10.1155/2015/861849[published  
5 Online First: Epub Date]].
- 6 123. Southerst D, Marchand AA, Cote P, et al. The effectiveness of noninvasive interventions for  
7 musculoskeletal thoracic spine and chest wall pain: a systematic review by the Ontario  
8 Protocol for Traffic Injury Management (OPTIMa) collaboration. *J Manipulative Physiol Ther*  
9 2015;**38**(7):521-31 doi: 10.1016/j.jmpt.2015.06.001[published Online First: Epub Date]].
- 10 124. Piper S, Shearer HM, Cote P, et al. The effectiveness of soft-tissue therapy for the management  
11 of musculoskeletal disorders and injuries of the upper and lower extremities: A systematic  
12 review by the Ontario Protocol for Traffic Injury management (OPTIMa) collaboration. *Man*  
13 *Ther* 2016;**21**:18-34 doi: 10.1016/j.math.2015.08.011[published Online First: Epub Date]].
- 14 125. de Vibe M, Bjørndal Arlid, Tipton Elizabeth, Hammerstrøm K, Kowalski K. Mindfulness Based  
15 Stress Reduction (MBSR) for Improving Health, Quality of Life, and Social Functioning in  
16 Adults, 2012.
- 17 126. Goyal M, Singh S, Sibinga EM, et al. Meditation programs for psychological stress and well-  
18 being: a systematic review and meta-analysis. *JAMA Internal Medicine* 2014;**174**(3):357-68
- 19 127. Smith CA, Hay PP, Macpherson H. Acupuncture for depression. *Cochrane Database of*  
20 *Systematic Reviews* 2010(1):CD004046
- 21 128. Zhang ZJ, Chen HY, Yip KC, Ng R, Wong VT. The effectiveness and safety of acupuncture therapy  
22 in depressive disorders: systematic review and meta-analysis. *Journal of Affective Disorders*  
23 2010;**124**(1-2):9-21
- 24 129. Wang H, Qi H, Wang BS, et al. Is acupuncture beneficial in depression: a meta-analysis of 8  
25 randomized controlled trials? *Journal of Affective Disorders* 2008;**111**(2-3):125-34
- 26 130. Klainin-Yobas P, Oo WN, Suzanne Yew PY, Lau Y. Effects of relaxation interventions on  
27 depression and anxiety among older adults: a systematic review. *Aging & mental health*  
28 2015:1-13 doi: 10.1080/13607863.2014.997191[published Online First: Epub Date]].
- 29 131. Cramer H, Lauche R, Langhorst J, Dobos G. Yoga for depression: a systematic review and meta-  
30 analysis. *Depression & Anxiety* 2013;**30**(11):1068-83
- 31 132. Maratos A, Gold C, Wang X, Crawford M. Music therapy for depression. *Cochrane database of*  
32 *systematic reviews (Online)* 2008(1):CD004517 doi:  
33 10.1002/14651858.CD004517.pub2[published Online First: Epub Date]].
- 34 133. Liu X, Clark J, Siskind D, et al. A systematic review and meta-analysis of the effects of Qigong  
35 and Tai Chi for depressive symptoms. *Complement Ther Med* 2015;**23**(4):516-34 doi:  
36 10.1016/j.ctim.2015.05.001[published Online First: Epub Date]].
- 37 134. Joyce J, Herbison GP. Reiki for depression and anxiety. *Cochrane Database of Systematic*  
38 *Reviews* 2015; (4).  
39 <http://onlinelibrary.wiley.com/doi/10.1002/14651858.CD006833.pub2/abstracthttp://onlinelibrary.wiley.com/store/10.1002/14651858.CD006833.pub2/asset/CD006833.pdf?v=1&t=ib3g7f71&s=fc7f57607f3f9ab6e5f4c9efedb82890cbf11111>.
- 40 135. Chi I, Jordan-Marsh M, Guo M, Xie B, Bai Z. Tai chi and reduction of depressive symptoms for  
41 older adults: a meta-analysis of randomized trials. *Geriatrics & gerontology international*  
42 2013;**13**(1):3-12
- 43 136. Kirkwood G, Rampes H, Tuffrey V, Richardson J, Pilkington K. Yoga for anxiety: a systematic  
44 review of the research evidence... including commentary by Ramaratnam S. *British journal of*  
45 *sports medicine* 2005;**39**(12):884-91; discussion 91 doi:  
46 10.1136/bjism.2005.018069[published Online First: Epub Date]].
- 47 137. Chugh-Gupta N, Baldassarre F, Vrkljan B. A systematic review of yoga for state anxiety:  
48 Considerations for occupational therapy. *Canadian Journal of Occupational Therapy*  
49 2013;**80**(3):150-70.
- 50 138. Krisanaprakornkit T, Krisanaprakornkit W, Piyavhatkul N, Laopaiboon M. Meditation therapy for  
51 anxiety disorders. *Cochrane Database of Systematic Reviews* 2006(1):CD004998
- 52  
53  
54  
55  
56  
57  
58  
59  
60

- 1  
2  
3 139. Chen KW, Berger CC, Manheimer E, et al. Meditative therapies for reducing anxiety: A  
4 systematic review and meta-analysis of randomized controlled trials. *Depression and Anxiety*  
5 2012;**29**(7):545-62
- 6 140. Pilkington K, Kirkwood G, Rampes H, Cummings M, Richardson J. Acupuncture for anxiety and  
7 anxiety disorders--a systematic literature review. *Acupuncture in Medicine* 2007;**25**(1-2):1-  
8 10
- 9 141. Wang CW, Chan CH, Ho RT, Chan JS, Ng SM, Chan CL. Managing stress and anxiety through  
10 qigong exercise in healthy adults: a systematic review and meta-analysis of randomized  
11 controlled trials. *BMC Complementary & Alternative Medicine* 2014;**14**:8
- 12 142. Wu H, Yu D, He Y, Wang J, Xiao Z, Li C. Morita therapy for anxiety disorders in adults. *Cochrane*  
13 *Database Syst Rev* 2015;**2**:CD008619 doi: 10.1002/14651858.CD008619.pub2[published  
14 Online First: Epub Date]].
- 15 143. Robinson J, Biley FC, Dolk H. Therapeutic touch for anxiety disorders. *Cochrane Database of*  
16 *Systematic Reviews* 2006;**(4)**(CD006240)
- 17 144. Wu W-w, Kwong E, Lan X-y, Jiang X-y. The Effect of a Meditative Movement Intervention on  
18 Quality of Sleep in the Elderly: A Systematic Review and Meta-Analysis. *The Journal of*  
19 *Alternative and Complementary Medicine* 2015 doi: 10.1089/acm.2014.0251[published  
20 Online First: Epub Date]].
- 21 145. Neuendorf R, Wahbeh H, #xe9, et al. The Effects of Mind-Body Interventions on Sleep Quality: A  
22 Systematic Review. *Evidence-Based Complementary and Alternative Medicine* 2015;**2015**:17  
23 doi: 10.1155/2015/902708[published Online First: Epub Date]].
- 24 146. Wang F, Eun-Kyoung Lee O, Feng F, et al. The effect of meditative movement on sleep quality: A  
25 systematic review. *Sleep Med Rev* 2015;**30**:43-52 doi: 10.1016/j.smrv.2015.12.001[published  
26 Online First: Epub Date]].
- 27 147. Huang W, Kutner N, Bliwise DL. A systematic review of the effects of acupuncture in treating  
28 insomnia. *Sleep Medicine Reviews* 2009;**13**(1):73-104
- 29 148. Lan Y, Wu X, Tan HJ, et al. Auricular acupuncture with seed or pellet attachments for primary  
30 insomnia: A systematic review and meta-analysis. *BMC Complementary and Alternative*  
31 *Medicine* 2015;**15**(1)
- 32 149. Du S, Dong J, Zhang H, et al. Taichi exercise for self-rated sleep quality in older people: A  
33 systematic review and meta-analysis. *International Journal of Nursing Studies*  
34 2015;**52**(1):368-79
- 35 150. Cooper KL, Relton C. Homeopathy for insomnia: a systematic review of research evidence. *Sleep*  
36 *Medicine Reviews* 2010;**14**(5):329-37
- 37 151. Lam TH, Chung KF, Yeung WF, Yu BY, Yung KP, Ng TH. Hypnotherapy for insomnia: a systematic  
38 review and meta-analysis of randomized controlled trials. *Complement Ther Med*  
39 2015;**23**(5):719-32 doi: 10.1016/j.ctim.2015.07.011[published Online First: Epub Date]].
- 40 152. Wieland LS, Skoetz N, Pilkington K, Vempati R, D'Adamo CR, Berman BM. Yoga treatment for  
41 chronic non-specific low back pain. *Cochrane Database of Systematic Reviews*  
42 2017;**1**:CD010671
- 43 153. Hilton L, Hempel S, Ewing BA, et al. Mindfulness Meditation for Chronic Pain: Systematic Review  
44 and Meta-analysis. *Ann Behav Med* 2017;**51**(2):199-213 doi: 10.1007/s12160-016-9844-  
45 2[published Online First: Epub Date]].
- 46 154. Anheyer D, Haller H, Barth J, Lauche R, Dobos G, Cramer H. Mindfulness-Based Stress Reduction  
47 for Treating Low Back Pain: A Systematic Review and Meta-analysis. *Annals of Internal*  
48 *Medicine* 2017;**166**(11):799-807
- 49 155. Shim JW, Jung JY, Kim SS. Effects of Electroacupuncture for Knee Osteoarthritis: A Systematic  
50 Review and Meta-Analysis. *Evidence-based Complementary and Alternative Medicine*  
51 2016;**2016 (no pagination)**(3485875)
- 52  
53  
54  
55  
56  
57  
58  
59  
60

- 1  
2  
3 156. Lin X, Huang K, Zhu G, Huang Z, Qin A, Fan S. The Effects of Acupuncture on Chronic Knee Pain  
4 Due to Osteoarthritis: A Meta-Analysis. *Journal of Bone & Joint Surgery - American Volume*  
5 2016;**98**(18):1578-85
- 6 157. Shea BJ, Reeves BC, Wells G, et al. AMSTAR 2: a critical appraisal tool for systematic reviews  
7 that include randomised or non-randomised studies of healthcare interventions, or both.  
8 *BMJ* 2017;**358** doi: 10.1136/bmj.j4008[published Online First: Epub Date]].
- 9 158. Linde K. Can you trust systematic reviews of complementary and alternative therapies? *Eur J*  
10 *Integr Med* 2009;**1**(3):117-23 doi: <http://dx.doi.org/10.1016/j.eujim.2009.09.002>[published  
11 Online First: Epub Date]].
- 12 159. Verhoef MJ, Lewith G, Ritenbaugh C, Boon H, Fleishman S, Leis A. Complementary and  
13 alternative medicine whole systems research: Beyond identification of inadequacies of the  
14 RCT. *Complement Ther Med* 2005;**13**(3):206-12
- 15 160. Carter B. Methodological issues and complementary therapies: researching intangibles?  
16 *Complementary Therapies in Nursing and Midwifery* 2003;**9**(3):133-39
- 17  
18  
19  
20  
21  
22  
23  
24  
25  
26  
27  
28  
29  
30  
31  
32  
33  
34  
35  
36  
37  
38  
39  
40  
41  
42  
43  
44  
45  
46  
47  
48  
49  
50  
51  
52  
53  
54  
55  
56  
57  
58  
59  
60

1  
2  
3  
4  
5  
6  
7  
8  
9  
10  
11  
12  
13  
14  
15  
16  
17  
18  
19  
20  
21  
22  
23  
24  
25  
26  
27  
28  
29  
30  
31  
32  
33  
34  
35  
36  
37  
38  
39  
40  
41  
42  
43  
44  
45  
46  
47  
48  
49  
50  
51  
52  
53  
54  
55  
56  
57  
58  
59  
60

Appendix 1: Inclusion and exclusion criteria for review

Appendix 2: Example search

Appendix 3: AMSTAR items reported in SRs

Figure 1: PRISMA flowchart

For peer review only

1  
2  
3  
4  
5  
6  
7  
8  
9  
10  
11  
12  
13  
14  
15  
16  
17  
18  
19  
20  
21  
22  
23  
24  
25  
26  
27  
28  
29  
30  
31  
32  
33  
34  
35  
36  
37  
38  
39  
40  
41  
42  
43  
44  
45  
46  
47  
48  
49  
50  
51  
52  
53  
54  
55  
56  
57  
58  
59  
60

For peer review only



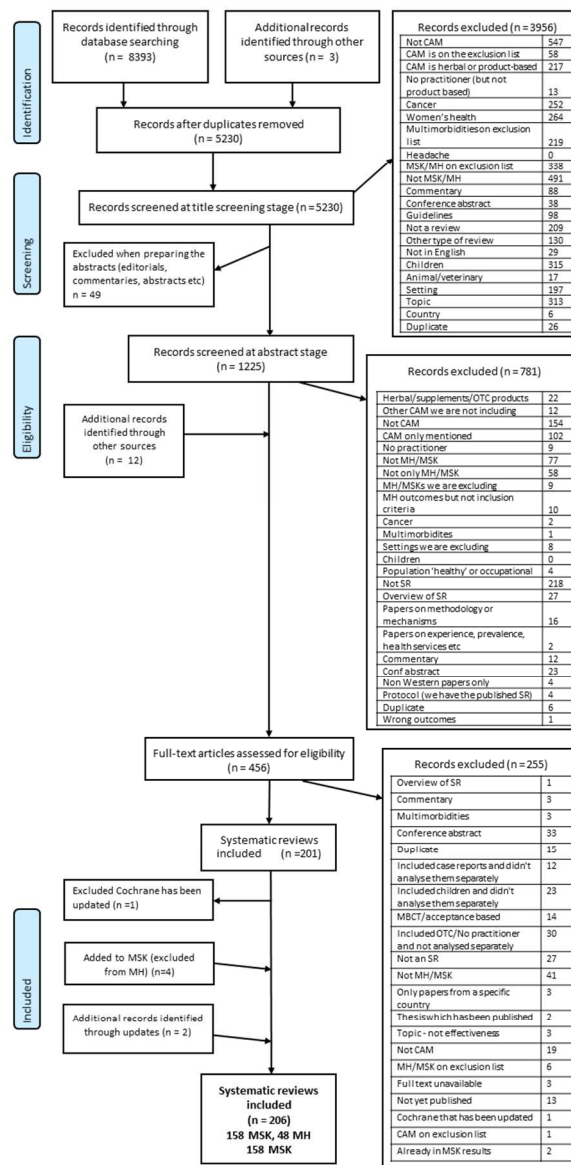

Figure 1: PRISMA flowchart

62x121mm (300 x 300 DPI)

## Appendix 1: Inclusion and exclusion criteria

|                               | Include                                                                                                                                                                                                                                                                                                                                                                                                                                                                                                                                                                                                                                                                                                                                                                                 | Exclude                                                                                                                                                                                                                                                                                                                                                                                                                                                                                                                                                                                                                                                                                                                                                                                                                                                         |
|-------------------------------|-----------------------------------------------------------------------------------------------------------------------------------------------------------------------------------------------------------------------------------------------------------------------------------------------------------------------------------------------------------------------------------------------------------------------------------------------------------------------------------------------------------------------------------------------------------------------------------------------------------------------------------------------------------------------------------------------------------------------------------------------------------------------------------------|-----------------------------------------------------------------------------------------------------------------------------------------------------------------------------------------------------------------------------------------------------------------------------------------------------------------------------------------------------------------------------------------------------------------------------------------------------------------------------------------------------------------------------------------------------------------------------------------------------------------------------------------------------------------------------------------------------------------------------------------------------------------------------------------------------------------------------------------------------------------|
| <b>Types of review</b>        | Systematic review and/or meta-analysis                                                                                                                                                                                                                                                                                                                                                                                                                                                                                                                                                                                                                                                                                                                                                  | Non-systematic searches; clinical summaries; mechanism reviews; conceptual reviews; historical reviews; herbal monographs; opinions/editorials; reviews of qualitative studies. Reviews including case studies. Reviews only available as an abstract                                                                                                                                                                                                                                                                                                                                                                                                                                                                                                                                                                                                           |
| <b>Topic of review</b>        | Efficacy, effectiveness, cost-effectiveness, safety                                                                                                                                                                                                                                                                                                                                                                                                                                                                                                                                                                                                                                                                                                                                     | Any other focus including prevalence, mechanisms                                                                                                                                                                                                                                                                                                                                                                                                                                                                                                                                                                                                                                                                                                                                                                                                                |
| <b>CAM</b>                    | Any under the MeSH term CAM, except those in the adjacent column (acupuncture (body or ear), acupressure, electroacupuncture, laser acupuncture, Alexander technique, aromatherapy, art therapy, anthroposophy, autogenic training, balneotherapy/hydrotherapy, Bowen, chiropractic, craniosacral, emotional freedom technique, Feldenkrais, guided imagery, kinesiology, homeopathy, hypnosis, integrative medicine, massage, manual therapy or manipulation, meditation, mindfulness, moxibustion, music therapy, naturopathy, osteopathy, Pilates, qi gong, reflexology, relaxation therapy, reiki, shiatsu, spiritual therapies, spiritual healing, tai chi, therapeutic touch, traditional medicine (all types - including TCM approaches such as tuina and guasha), trager, yoga) | Those which are not considered CAM in a UK NHS setting: acoustic stimulation, bee venom acupuncture, biofeedback, breathing exercises, cell therapy, colour therapy, dance therapy, detoxification, deep transverse friction massage, diets, horticultural therapy, light therapy, leech therapy, lifestyle changes, laughter therapy, low level laser therapy (included laser acupuncture which is based on TCM acupuncture points), MBCT, mental healing, magnet therapy, NLP, neural therapy, prayer, play therapy, psychodrama, psychophysiology, prolotherapy, sensory art therapy, suggestion, transcranial magnetic stimulation, TENS rejuvenation, western medicine<br>Herbal medicine/phytotherapy, as the majority of studies do not involve a practitioner<br>Oral or topical CAM which are given to the patient without the input of a practitioner |
| <b>Intervention details</b>   | Practitioner-based CAM only<br><br>The CAM must be the main focus of the paper.                                                                                                                                                                                                                                                                                                                                                                                                                                                                                                                                                                                                                                                                                                         | Over-the-counter, online, self-help only.<br><br>CAM is only mentioned amongst a list of other active interventions                                                                                                                                                                                                                                                                                                                                                                                                                                                                                                                                                                                                                                                                                                                                             |
| <b>MSK: muscular diseases</b> | Muscular diseases                                                                                                                                                                                                                                                                                                                                                                                                                                                                                                                                                                                                                                                                                                                                                                       | Carpal tunnel; compartment syndromes; contracture; craniomandibular disorders; eosinophilia-myalgia syndrome; muscle cramp; muscular abnormalities; muscle neoplasms;                                                                                                                                                                                                                                                                                                                                                                                                                                                                                                                                                                                                                                                                                           |

|                                                                         |                                                                   |                                                                                                                                                                                                                                                                                                                                                                                   |
|-------------------------------------------------------------------------|-------------------------------------------------------------------|-----------------------------------------------------------------------------------------------------------------------------------------------------------------------------------------------------------------------------------------------------------------------------------------------------------------------------------------------------------------------------------|
|                                                                         |                                                                   | mitochondrial myopathies; myositis; paralysis; rhabdomyolysis; spinal stenosis                                                                                                                                                                                                                                                                                                    |
| <b>MSK: bone diseases</b>                                               | Osteoarthropathy                                                  | All other bone diseases                                                                                                                                                                                                                                                                                                                                                           |
| <b>MSK: rheumatic diseases</b>                                          | Arthritis, Fibromyalgia                                           | Juvenile arthritis; rheumatic fever; sternocostoclavicular; hyperostosis; infectious arthritis; Reiter's disease; rheumatic fever                                                                                                                                                                                                                                                 |
| <b>MSK: other</b>                                                       | Musculoskeletal pain                                              | Abdominal pain; cranial pain; ear ache; eye pain; facial pain; headache/migraine; jaw disorders; labour pain; nipple pain; neuralgia; neuropathic pain; pelvic pain; phantom limb pain; sprains                                                                                                                                                                                   |
| <b>MH (as diagnoses or symptoms not just outcomes)</b>                  | Anxiety; stress; bipolar; loneliness, low mood                    | Autism; Alzheimer's; ADHD; child/domestic abuse; delusions; dementia; delirium; eating disorders; learning/intellectual disorders; OCD; Parkinson's; personality disorders; psychotic conditions; psychological trauma; PTSD; quality of life; sexual/gender disorders; substance misuse/abuse; substance abuse; schizophrenia; serious mental health; suicide; sexual disorders; |
|                                                                         | Somatoform disorders                                              | Hypochondriasis                                                                                                                                                                                                                                                                                                                                                                   |
|                                                                         | Depression                                                        | Postpartum or premenstrual depression; postoperative depression; depressive psychosis; atypical depression                                                                                                                                                                                                                                                                        |
|                                                                         | Stress, stress management                                         | Financial strain; oxidative stress; physiological stress; posttraumatic stress; stress incontinence                                                                                                                                                                                                                                                                               |
|                                                                         | Sleep problems, insomnia                                          | Restless leg syndrome                                                                                                                                                                                                                                                                                                                                                             |
| <b>Other multimorbidities/populations: serious/long term conditions</b> | Cardiovascular; diabetes; digestive issues; obesity; respiratory; | Asthma; brain injury; cancer chronic fatigue syndrome; cystic fibrosis; epilepsy; hepatitis; HIV/AIDS; kidney disease; multiple sclerosis, stroke/post stroke; sleep apnoea                                                                                                                                                                                                       |
| <b>Other multimorbidities/populations: acute conditions</b>             | None                                                              | Injuries, infections                                                                                                                                                                                                                                                                                                                                                              |
| <b>Other multimorbidities/populations: settings</b>                     | Carers                                                            | Critical illness; intensive care; military; nursing home; palliative care; prisons; surgery                                                                                                                                                                                                                                                                                       |
| <b>Other multimorbidities/populations: women's health</b>               | -                                                                 | Endometriosis; infertility; labour/postpartum/pregnancy; PCOS; menopause; menstrual pain; pelvic pain                                                                                                                                                                                                                                                                             |
|                                                                         | -                                                                 | Memory impairment                                                                                                                                                                                                                                                                                                                                                                 |

|                                                          |                                                                                                   |                                                                     |
|----------------------------------------------------------|---------------------------------------------------------------------------------------------------|---------------------------------------------------------------------|
| <b>Other multimorbidities/ populations: disabilities</b> | -                                                                                                 | Hearing loss/impairment                                             |
|                                                          | -                                                                                                 | Vision loss/impairment                                              |
| <b>Population</b>                                        | Adults only $\geq$ 18yrs (include if children were included but reported and analysed separately) | Animal studies or laboratory studies                                |
|                                                          | Need to be generalisable to GP population                                                         | Healthy populations or specific occupations (e.g. nurses, teachers) |
| <b>Language</b>                                          | English only                                                                                      | Any other language                                                  |
| <b>Date of publication</b>                               | 2005 or later                                                                                     | Pre 2005                                                            |
| <b>For trial registries</b>                              | Only those which were completed and we had not picked up in other searches                        | Currently recruiting or not recruiting                              |
| <b>Country</b>                                           | Reviews including studies from Western countries                                                  | Review of studies from only non-Western countries                   |

*Appendix 2 Example search (OVID Medline)*

1. "Alexander technique".tw.
2. "bowen technique".tw.
3. craniosacral.tw.
4. ("emotional freedom technique" or EFT).tw.
5. feldenkrais.tw.
6. Pilates.tw.
7. reiki.tw.
8. Shiatsu.tw.
9. trager.tw.
10. "complementary medicine".tw.
11. "integrative medicine".tw.
12. exp complementary therapies/
13. integrative medicine/
14. Manipulation, Spinal/
15. acupuncture/
16. Musculoskeletal manipulations/
17. Mindfulness/
18. **1 or 2 or 3 or 4 or 5 or 6 or 7 or 8 or 9 or 10 or 11 or 12 or 13 or 14 or 15 or 16 or 17**
19. exp Musculoskeletal System/
20. exp Musculoskeletal Diseases/
21. myalgia/
22. exp back pain/
23. neck pain/
24. chronic pain/
25. headache/ or exp headache disorders, primary/
26. **19 or 20 or 21 or 22 or 23 or 24 or 25**
27. ((systematic or structured or evidence or trials).ti. and ((review or overview or look or examination or update\$ or summary).ti. or review.pt.) or (meta analysis.pt. or meta-analysis/ or "0266-4623".is.) or (reviewed systematically or systematically reviewed).tw. or (1469-493X or 1366-5278 or 1530-440X).is.
28. ("review" or "review academic" or "review tutorial").pt.
29. (medline or medlars or embase or pubmed).tw,sh.
30. (scisearch or psychinfo or psycinfo).tw,sh.
31. (psychlit or psychlit).tw,sh.
32. cinahl.tw,sh.
33. ((hand adj2 search\$) or (manual\$ adj2 search\$)).tw,sh.
34. (electronic database\$ or bibliographic database\$ or computeri#ed database\$ or online database\$).tw,sh.
35. (pooling or pooled or mantel haenszel).tw,sh.
36. (retraction of publication or retracted publication).pt.
37. (peto or dersimonian or der simonian or fixed effect).tw,sh.
38. **29 or 30 or 31 or 32 or 33 or 34 or 35 or 36 or 37**
39. **28 and 38**
40. meta-analysis.pt.
41. meta-analysis.sh.
42. (meta analys\$ or metaanalys\$).tw,sh.
43. (systematic\$ adj5 review\$).tw,sh.
44. (systematic\$ adj5 overview\$).tw,sh.
45. (quantitativ\$ adj5 review\$).tw,sh.
46. (quantitativ\$ adj5 overview\$).tw,sh.
47. (quantitativ\$ adj5 synthesis\$).tw,sh.
48. (methodologic\$ adj5 review\$).tw,sh.
49. (methodologic\$ adj5 overview\$).tw,sh.
50. (integrative research review\$ or research integration).tw.
51. **40 or 41 or 42 or 43 or 44 or 45 or 46 or 47 or 48 or 49 or 50**
52. **27 or 39 or 51**
53. **18 and 26 and 52**

**Appendix 3: AMSTAR items reported**

**AMSTAR items reported in MSK reviews**

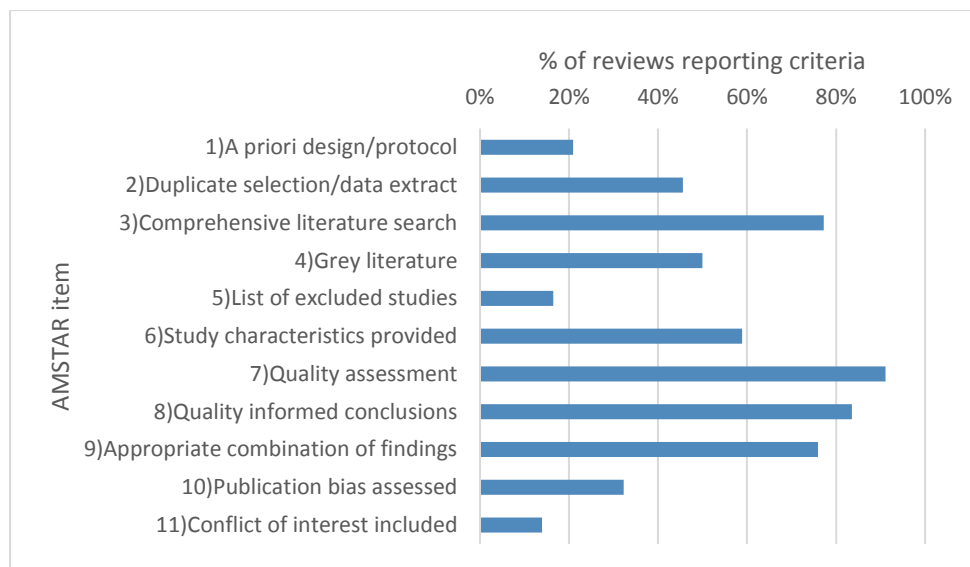

**AMSTAR items reported in MH reviews**

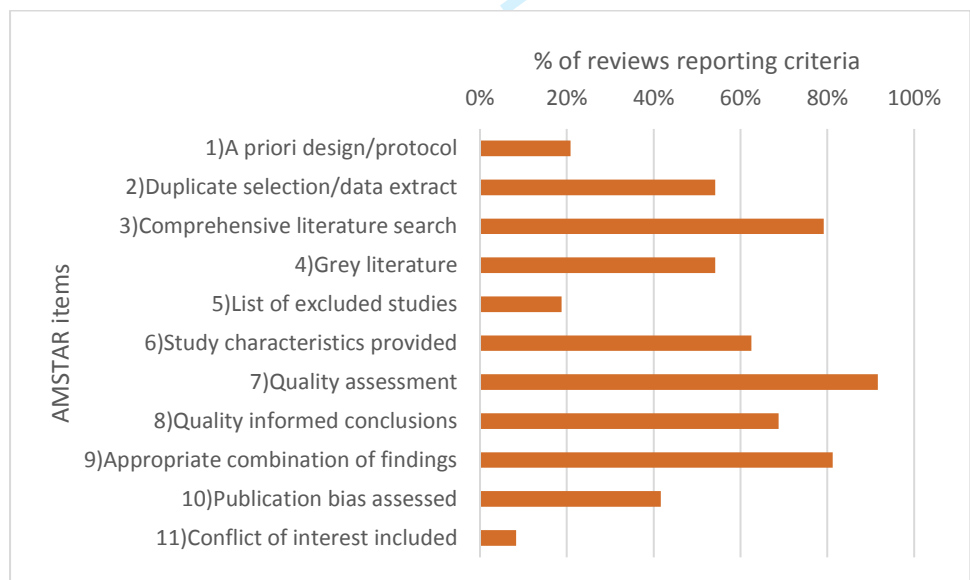

Supplement: bmjopen-2017-020222.draft_revisions.pdf [file bmjopen-2017-020222.draft_revisions.pdf]
