# Supplementary material for: Scoping review of systematic reviews of complementary medicine for musculoskeletal and mental health conditions
Source: PubMed Central journal article supplement — BMJ Open. 2018 Oct 15;8(10):e020222. doi: 10.1136/bmjopen-2017-020222 (PMC6196876; doi:10.1136/bmjopen-2017-020222), 2018-10-15
Supplement: bmjopen-2017-020222supp001.pdf [file bmjopen-2017-020222supp001.pdf]

## Appendix 1: Inclusion and exclusion criteria

|                               | Include                                                                                                                                                                                                                                                                                                                                                                                                                                                                                                                                                                                                                                                                                                                                                                                 | Exclude                                                                                                                                                                                                                                                                                                                                                                                                                                                                                                                                                                                                                                                                     |
|-------------------------------|-----------------------------------------------------------------------------------------------------------------------------------------------------------------------------------------------------------------------------------------------------------------------------------------------------------------------------------------------------------------------------------------------------------------------------------------------------------------------------------------------------------------------------------------------------------------------------------------------------------------------------------------------------------------------------------------------------------------------------------------------------------------------------------------|-----------------------------------------------------------------------------------------------------------------------------------------------------------------------------------------------------------------------------------------------------------------------------------------------------------------------------------------------------------------------------------------------------------------------------------------------------------------------------------------------------------------------------------------------------------------------------------------------------------------------------------------------------------------------------|
| <b>Types of review</b>        | Systematic review and/or meta-analysis                                                                                                                                                                                                                                                                                                                                                                                                                                                                                                                                                                                                                                                                                                                                                  | Non-systematic searches; clinical summaries; mechanism reviews; conceptual reviews; historical reviews; herbal monographs; opinions/editorials; reviews of qualitative studies. Reviews including case studies. Reviews only available as an abstract                                                                                                                                                                                                                                                                                                                                                                                                                       |
| <b>Topic of review</b>        | Efficacy, effectiveness, cost-effectiveness, safety                                                                                                                                                                                                                                                                                                                                                                                                                                                                                                                                                                                                                                                                                                                                     | Any other focus including prevalence, mechanisms                                                                                                                                                                                                                                                                                                                                                                                                                                                                                                                                                                                                                            |
| <b>CAM</b>                    | Any under the MeSH term CAM, except those in the adjacent column (acupuncture (body or ear), acupressure, electroacupuncture, laser acupuncture, Alexander technique, aromatherapy, art therapy, anthroposophy, autogenic training, balneotherapy/hydrotherapy, Bowen, chiropractic, craniosacral, emotional freedom technique, Feldenkrais, guided imagery, kinesiology, homeopathy, hypnosis, integrative medicine, massage, manual therapy or manipulation, meditation, mindfulness, moxibustion, music therapy, naturopathy, osteopathy, Pilates, qi gong, reflexology, relaxation therapy, reiki, shiatsu, spiritual therapies, spiritual healing, tai chi, therapeutic touch, traditional medicine (all types - including TCM approaches such as tuina and guasha), trager, yoga) | Those which are not considered CAM in a UK NHS setting: acoustic stimulation, bee venom acupuncture, biofeedback, breathing exercises, cell therapy, colour therapy, dance therapy, detoxification, deep transverse friction massage, diets, horticultural therapy, light therapy, leech therapy, lifestyle changes, laughter therapy, low level laser therapy (included laser acupuncture which is based on TCM acupuncture points), MBCT, mental healing, magnet therapy, NLP, neural therapy, prayer, play therapy, psychodrama, psychophysiology, prolotherapy, sensory art therapy, suggestion, transcranial magnetic stimulation, TENS rejuvenation, western medicine |
|                               |                                                                                                                                                                                                                                                                                                                                                                                                                                                                                                                                                                                                                                                                                                                                                                                         | Herbal medicine/phytotherapy, as the majority of studies do not involve a practitioner                                                                                                                                                                                                                                                                                                                                                                                                                                                                                                                                                                                      |
|                               |                                                                                                                                                                                                                                                                                                                                                                                                                                                                                                                                                                                                                                                                                                                                                                                         | Oral or topical CAM which are given to the patient without the input of a practitioner                                                                                                                                                                                                                                                                                                                                                                                                                                                                                                                                                                                      |
| <b>Intervention details</b>   | Practitioner-based CAM only                                                                                                                                                                                                                                                                                                                                                                                                                                                                                                                                                                                                                                                                                                                                                             | Over-the-counter, online, self-help only.                                                                                                                                                                                                                                                                                                                                                                                                                                                                                                                                                                                                                                   |
|                               | The CAM must be the main focus of the paper.                                                                                                                                                                                                                                                                                                                                                                                                                                                                                                                                                                                                                                                                                                                                            | CAM is only mentioned amongst a list of other active interventions                                                                                                                                                                                                                                                                                                                                                                                                                                                                                                                                                                                                          |
| <b>MSK: muscular diseases</b> | Muscular diseases                                                                                                                                                                                                                                                                                                                                                                                                                                                                                                                                                                                                                                                                                                                                                                       | Carpal tunnel; compartment syndromes; contracture; craniomandibular disorders; eosinophilia-myalgia syndrome; muscle cramp; muscular abnormalities; muscle neoplasms;                                                                                                                                                                                                                                                                                                                                                                                                                                                                                                       |

|                                                                          |                                                                   |                                                                                                                                                                                                                                                                                                                                                                                   |
|--------------------------------------------------------------------------|-------------------------------------------------------------------|-----------------------------------------------------------------------------------------------------------------------------------------------------------------------------------------------------------------------------------------------------------------------------------------------------------------------------------------------------------------------------------|
|                                                                          |                                                                   | mitochondrial myopathies; myositis; paralysis; rhabdomyolysis; spinal stenosis                                                                                                                                                                                                                                                                                                    |
| <b>MSK: bone diseases</b>                                                | Osteoarthropathy                                                  | All other bone diseases                                                                                                                                                                                                                                                                                                                                                           |
| <b>MSK: rheumatic diseases</b>                                           | Arthritis, Fibromyalgia                                           | Juvenile arthritis; rheumatic fever; sternocostoclavicular; hyperostosis; infectious arthritis; Reiter's disease; rheumatic fever                                                                                                                                                                                                                                                 |
| <b>MSK: other</b>                                                        | Musculoskeletal pain                                              | Abdominal pain; cranial pain; ear ache; eye pain; facial pain; headache/migraine; jaw disorders; labour pain; nipple pain; neuralgia; neuropathic pain; pelvic pain; phantom limb pain; sprains                                                                                                                                                                                   |
| <b>MH (as diagnoses or symptoms not just outcomes)</b>                   | Anxiety; stress; bipolar; loneliness, low mood                    | Autism; Alzheimer's; ADHD; child/domestic abuse; delusions; dementia; delirium; eating disorders; learning/intellectual disorders; OCD; Parkinson's; personality disorders; psychotic conditions; psychological trauma; PTSD; quality of life; sexual/gender disorders; substance misuse/abuse; substance abuse; schizophrenia; serious mental health; suicide; sexual disorders; |
|                                                                          | Somatoform disorders                                              | Hypochondriasis                                                                                                                                                                                                                                                                                                                                                                   |
|                                                                          | Depression                                                        | Postpartum or premenstrual depression; postoperative depression; depressive psychosis; atypical depression                                                                                                                                                                                                                                                                        |
|                                                                          | Stress, stress management                                         | Financial strain; oxidative stress; physiological stress; posttraumatic stress; stress incontinence                                                                                                                                                                                                                                                                               |
|                                                                          | Sleep problems, insomnia                                          | Restless leg syndrome                                                                                                                                                                                                                                                                                                                                                             |
| <b>Other multimorbidities/ populations: serious/long term conditions</b> | Cardiovascular; diabetes; digestive issues; obesity; respiratory; | Asthma; brain injury; cancer chronic fatigue syndrome; cystic fibrosis; epilepsy; hepatitis; HIV/AIDS; kidney disease; multiple sclerosis, stroke/post stroke; sleep apnoea                                                                                                                                                                                                       |
| <b>Other multimorbidities/ populations: acute conditions</b>             | None                                                              | Injuries, infections                                                                                                                                                                                                                                                                                                                                                              |
| <b>Other multimorbidities/ populations: settings</b>                     | Carers                                                            | Critical illness; intensive care; military; nursing home; palliative care; prisons; surgery                                                                                                                                                                                                                                                                                       |
| <b>Other multimorbidities/ populations: women's health</b>               | -                                                                 | Endometriosis; infertility; labour/postpartum/pregnancy; PCOS; menopause; menstrual pain; pelvic pain                                                                                                                                                                                                                                                                             |
|                                                                          | -                                                                 | Memory impairment                                                                                                                                                                                                                                                                                                                                                                 |

|                                                          |                                                                                                    |                                                                     |
|----------------------------------------------------------|----------------------------------------------------------------------------------------------------|---------------------------------------------------------------------|
| <b>Other multimorbidities/ populations: disabilities</b> | -                                                                                                  | Hearing loss/impairment                                             |
|                                                          | -                                                                                                  | Vision loss/impairment                                              |
| <b>Population</b>                                        | Adults only $\geq 18$ yrs (include if children were included but reported and analysed separately) | Animal studies or laboratory studies                                |
|                                                          | Need to be generalisable to GP population                                                          | Healthy populations or specific occupations (e.g. nurses, teachers) |
| <b>Language</b>                                          | English only                                                                                       | Any other language                                                  |
| <b>Date of publication</b>                               | 2005 or later                                                                                      | Pre 2005                                                            |
| <b>For trial registries</b>                              | Only those which were completed and we had not picked up in other searches                         | Currently recruiting or not recruiting                              |
| <b>Country</b>                                           | Reviews including studies from Western countries                                                   | Review of studies from only non-Western countries                   |
