# Supplementary material for: Scoping review of systematic reviews of complementary medicine for musculoskeletal and mental health conditions
Source: PubMed Central journal article supplement — BMJ Open. 2018 Oct 15;8(10):e020222. doi: 10.1136/bmjopen-2017-020222 (PMC6196876; doi:10.1136/bmjopen-2017-020222), 2018-10-15
Supplement: bmjopen-2017-020222supp002.pdf [file bmjopen-2017-020222supp002.pdf]

Appendix 2 Example search (OVID Medline)

1. "Alexander technique".tw.
2. "bowen technique".tw.
3. craniosacral.tw.
4. ("emotional freedom technique" or EFT).tw.
5. feldenkrais.tw.
6. Pilates.tw.
7. reiki.tw.
8. Shiatsu.tw.
9. trager.tw.
10. "complementary medicine".tw.
11. "integrative medicine".tw.
12. exp complementary therapies/
13. integrative medicine/
14. Manipulation, Spinal/
15. acupuncture/
16. Musculoskeletal manipulations/
17. Mindfulness/
18. **1 or 2 or 3 or 4 or 5 or 6 or 7 or 8 or 9 or 10 or 11 or 12 or 13 or 14 or 15 or 16 or 17**
19. exp Musculoskeletal System/
20. exp Musculoskeletal Diseases/
21. myalgia/
22. exp back pain/
23. neck pain/
24. chronic pain/
25. headache/ or exp headache disorders, primary/
26. **19 or 20 or 21 or 22 or 23 or 24 or 25**
27. ((systematic or structured or evidence or trials).ti. and ((review or overview or look or examination or update\$ or summary).ti. or review.pt.)) or (meta analysis.pt. or meta-analysis/ or "0266-4623".is.) or (reviewed systematically or systematically reviewed).tw. or (1469-493X or 1366-5278 or 1530-440X).is.
28. ("review" or "review academic" or "review tutorial").pt.
29. (medline or medlars or embase or pubmed).tw,sh.
30. (scisearch or psychinfo or psycinfo).tw,sh.
31. (psychlit or psyclit).tw,sh.
32. cinahl.tw,sh.
33. ((hand adj2 search\$) or (manual\$ adj2 search\$)).tw,sh.
34. (electronic database\$ or bibliographic database\$ or computeri#ed database\$ or online database\$).tw,sh.
35. (pooling or pooled or mantel haenszel).tw,sh.
36. (retraction of publication or retracted publication).pt.
37. (peto or dersimonian or der simonian or fixed effect).tw,sh.
38. **29 or 30 or 31 or 32 or 33 or 34 or 35 or 36 or 37**
39. **28 and 38**
40. meta-analysis.pt.
41. meta-analysis.sh.
42. (meta analys\$ or metaanalys\$).tw,sh.
43. (systematic\$ adj5 review\$).tw,sh.
44. (systematic\$ adj5 overview\$).tw,sh.
45. (quantitativ\$ adj5 review\$).tw,sh.
46. (quantitativ\$ adj5 overview\$).tw,sh.
47. (quantitativ\$ adj5 synthesis\$).tw,sh.
48. (methodologic\$ adj5 review\$).tw,sh.
49. (methodologic\$ adj5 overview\$).tw,sh.
50. (integrative research review\$ or research integration).tw.
51. **40 or 41 or 42 or 43 or 44 or 45 or 46 or 47 or 48 or 49 or 50**
52. **27 or 39 or 51**
53. **18 and 26 and 52**
