# Supplementary material for: Scoping review of systematic reviews of complementary medicine for musculoskeletal and mental health conditions
Source: PubMed Central journal article supplement — BMJ Open. 2018 Oct 15;8(10):e020222. doi: 10.1136/bmjopen-2017-020222 (PMC6196876; doi:10.1136/bmjopen-2017-020222), 2018-10-15

### Appendix 3: AMSTAR items reported

#### AMSTAR items reported in MSK reviews

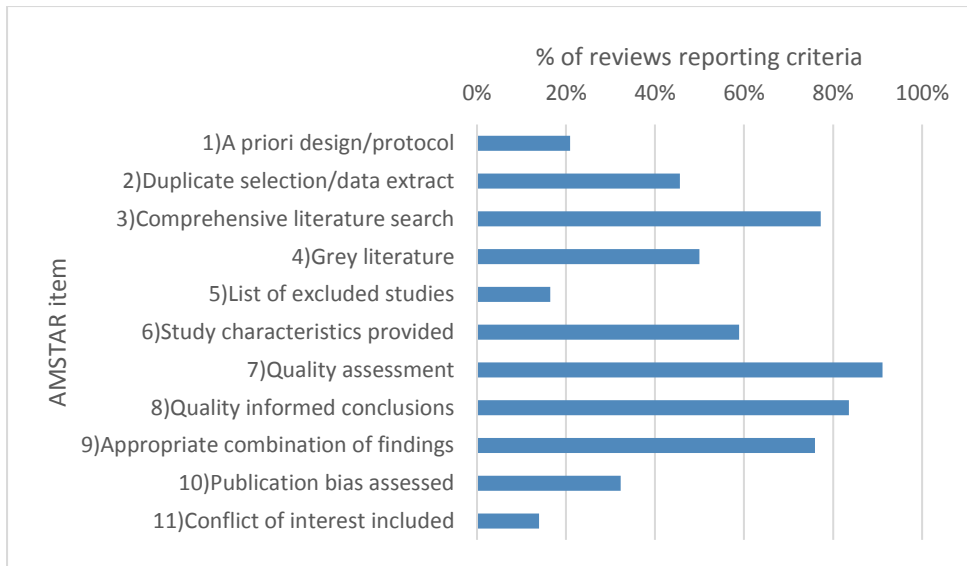

#### AMSTAR items reported in MH reviews

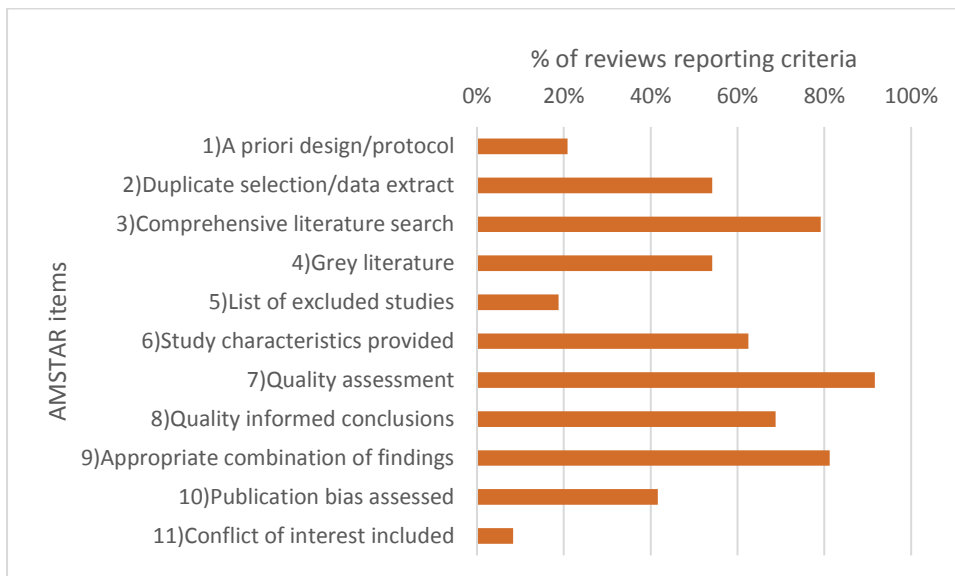

Supplement: bmjopen-2017-020222supp003.pdf [file bmjopen-2017-020222supp003.pdf]
